# Supplementary material for: Ricinodols A–G: new tetracyclic triterpenoids as 11β-HSD1 inhibitors from Ricinodendron heudelotii
Source: Royal Society of Chemistry journal article supplement (doi:10.1039/c5ra01857a), 2015-01-01

Electronic supplementary information for

## **Ricinodols A–G: New Tetracyclic Triterpenoids as 11 $\beta$ -HSD1**

### **Inhibitors from *Ricinodendron heudelotii***

Jin-Hai Yu, Yu Shen, Yan Wu, Ying Leng, Hua Zhang,\* and Jian-Min Yue\*

*State Key Laboratory of Drug Research, Shanghai Institute of Materia Medica, Chinese Academy of Sciences, 555 Zu Chong Zhi Road, Shanghai 201203, People's Republic of China*

*E-mails: h.zhang@simm.ac.cn; jmyue@simm.ac.cn; Tel.: +86-21-50806718; Fax.: +86-21-50807088*

**Table S1.** Preliminary assay results of tested compounds against human 11 $\beta$ -HSD1 at 10.0  $\mu$ M.

**Table S2.** Preliminary assay results of tested compounds against mouse 11 $\beta$ -HSD1 at 10.0  $\mu$ M.

**Figure S1.** Induced CD spectrum of the Mo<sub>2</sub><sup>4+</sup> complex for **2** in DMSO

**Figure S2.** Induced CD spectrum of the Mo<sub>2</sub><sup>4+</sup> complex for **5** in DMSO

**Figure S3.** <sup>1</sup>H NMR spectrum of ricinodol A (**1**) in CDCl<sub>3</sub>

**Figure S4.** <sup>13</sup>C NMR spectrum of ricinodol A (**1**) in CDCl<sub>3</sub>

**Figure S5.** HSQC spectrum of ricinodol A (**1**) in CDCl<sub>3</sub>

**Figure S6.** <sup>1</sup>H–<sup>1</sup>H COSY spectrum of ricinodol A (**1**) in CDCl<sub>3</sub>

**Figure S7.** HMBC spectrum of ricinodol A (**1**) in CDCl<sub>3</sub>

**Figure S8.** ROESY spectrum of ricinodol A (**1**) in CDCl<sub>3</sub>

**Figure S9.** ESI(+)MS spectrum of ricinodol A (**1**)

**Figure S10.** ESI(–)MS spectrum of ricinodol A (**1**)

**Figure S11.** HRESI(–)MS spectrum of ricinodol A (**1**)

**Figure S12.** IR spectrum of ricinodol A (**1**)

**Figure S13.** <sup>1</sup>H NMR spectrum of ricinodol B (**2**) in CDCl<sub>3</sub>

**Figure S14.** <sup>13</sup>C NMR spectrum of ricinodol B (**2**) in CDCl<sub>3</sub>

**Figure S15.** HSQC spectrum of ricinodol B (**2**) in CDCl<sub>3</sub>

**Figure S16.** HMBC spectrum of ricinodol B (**2**) in CDCl<sub>3</sub>

**Figure S17.** ROESY spectrum of ricinodol B (**2**) in CDCl<sub>3</sub>

**Figure S18.** ESI(+)MS spectrum of ricinodol B (**2**)

**Figure S19.** ESI(–)MS spectrum of ricinodol B (**2**)

**Figure S20.** HRESI(+)MS spectrum of ricinodol B (**2**)

**Figure S21.** IR spectrum of ricinodol B (**2**)

**Figure S22.** <sup>1</sup>H NMR spectrum of ricinodol C (**3**) in CDCl<sub>3</sub>

**Figure S23.**  $^{13}\text{C}$  NMR spectrum of ricinodol C (**3**) in  $\text{CDCl}_3$   
**Figure S24.** HSQC spectrum of ricinodol C (**3**) in  $\text{CDCl}_3$   
**Figure S25.**  $^1\text{H}$ - $^1\text{H}$  COSY spectrum of ricinodol C (**3**) in  $\text{CDCl}_3$   
**Figure S26.** HMBC spectrum of ricinodol C (**3**) in  $\text{CDCl}_3$   
**Figure S27.** ROESY spectrum of ricinodol C (**3**) in  $\text{CDCl}_3$   
**Figure S28.** ESI(+)-MS spectrum of ricinodol C (**3**)  
**Figure S29.** ESI(-)-MS spectrum of ricinodol C (**3**)  
**Figure S30.** HRESI(-)-MS spectrum of ricinodol C (**3**)  
**Figure S31.** IR spectrum of ricinodol C (**3**)

**Figure S32.**  $^1\text{H}$  NMR spectrum of ricinodol D (**4**) in  $\text{CDCl}_3$   
**Figure S33.**  $^{13}\text{C}$  NMR spectrum of ricinodol D (**4**) in  $\text{CDCl}_3$   
**Figure S34.** HSQC spectrum of ricinodol D (**4**) in  $\text{CDCl}_3$   
**Figure S35.** HMBC spectrum of ricinodol D (**4**) in  $\text{CDCl}_3$   
**Figure S36.** ROESY spectrum of ricinodol C (**4**) in  $\text{CDCl}_3$   
**Figure S37.** ESI(+)-MS spectrum of ricinodol D (**4**)  
**Figure S38.** ESI(-)-MS spectrum of ricinodol D (**4**)  
**Figure S39.** HRESI(+)-MS spectrum of ricinodol D (**4**)  
**Figure S40.** IR spectrum of ricinodol D (**4**)

**Figure S41.**  $^1\text{H}$  NMR spectrum of ricinodol E (**5**) in  $\text{CDCl}_3$   
**Figure S42.**  $^{13}\text{C}$  NMR spectrum of ricinodol E (**5**) in  $\text{CDCl}_3$   
**Figure S43.** HSQC spectrum of ricinodol E (**5**) in  $\text{CDCl}_3$   
**Figure S44.** HMBC spectrum of ricinodol E (**5**) in  $\text{CDCl}_3$   
**Figure S45.** ROESY spectrum of ricinodol E (**5**) in  $\text{CDCl}_3$   
**Figure S46.** ESI(+)-MS spectrum of ricinodol E (**5**)  
**Figure S47.** ESI(-)-MS spectrum of ricinodol E (**5**)  
**Figure S48.** HRESI(-)-MS spectrum of ricinodol E (**5**)  
**Figure S49.** IR spectrum of ricinodol E (**5**)

**Figure S50.**  $^1\text{H}$  NMR spectrum of ricinodol F (**6**) in  $\text{CDCl}_3$   
**Figure S51.**  $^{13}\text{C}$  NMR spectrum of ricinodol F (**6**) in  $\text{CDCl}_3$   
**Figure S52.** HSQC spectrum of ricinodol F (**6**) in  $\text{CDCl}_3$   
**Figure S53.** HMBC spectrum of ricinodol F (**6**) in  $\text{CDCl}_3$   
**Figure S54.** ROESY spectrum of ricinodol F (**6**) in  $\text{CDCl}_3$   
**Figure S55.** ESI(+)-MS spectrum of ricinodol F (**6**)  
**Figure S56.** ESI(-)-MS spectrum of ricinodol F (**6**)  
**Figure S57.** HRESI(-)-MS spectrum of ricinodol F (**6**)  
**Figure S58.** IR spectrum of ricinodol F (**6**)

**Figure S59.**  $^1\text{H}$  NMR spectrum of ricinodol G (**7**) in  $\text{CDCl}_3$   
**Figure S60.**  $^{13}\text{C}$  NMR spectrum of ricinodol G (**7**) in  $\text{CDCl}_3$   
**Figure S61.** HSQC spectrum of ricinodol G (**7**) in  $\text{CDCl}_3$   
**Figure S62.** HMBC spectrum of ricinodol G (**7**) in  $\text{CDCl}_3$

**Figure S63.** ROESY spectrum of ricinodol G (7) in  $\text{CDCl}_3$

**Figure S64.** ESI(+)MS spectrum of ricinodol G (7)

**Figure S65.** ESI(-)MS spectrum of ricinodol G (7)

**Figure S66.** HRESI(-)MS spectrum of ricinodol G (7)

**Figure S67.** IR spectrum of ricinodol G (7)

**Table S1.** Preliminary assay results of tested compounds against human 11 $\beta$ -HSD1 at 10.0 $\mu$ M.

| Compds no.               | Exp. 1 | Exp. 2 | Exp. 3 | Average | SD   |
|--------------------------|--------|--------|--------|---------|------|
| <b>1</b>                 | 63.0%  | 51.3%  | 61.6%  | 58.6%   | 6.4% |
| <b>2</b>                 | 21.0%  | 17.4%  | 15.8%  | 18.1%   | 2.6% |
| <b>3</b>                 | 64.3%  | 58.5%  | 59.8%  | 60.8%   | 3.0% |
| <b>4</b>                 | 62.2%  | 58.5%  | 54.3%  | 58.4%   | 4.0% |
| <b>5</b>                 | 98.8%  | 94.3%  | 95.4%  | 96.2%   | 2.4% |
| <b>6</b>                 | 56.9%  | 53.0%  | 53.4%  | 54.4%   | 2.1% |
| <b>7</b>                 | 55.2%  | 56.1%  | 56.5%  | 56.0%   | 0.6% |
| <b>8</b>                 | 28.5%  | 28.8%  | 37.0%  | 31.4%   | 4.8% |
| <b>9</b>                 | 12.1%  | 14.6%  | 19.6%  | 15.4%   | 3.8% |
| <b>10</b>                | 35.6%  | 27.8%  | 34.6%  | 32.7%   | 4.2% |
| Glycyrrhetic acid 1 nM   | 27.6%  | 21.0%  | 19.1%  | 22.6%   | 4.4% |
| Glycyrrhetic acid 10 nM  | 61.1%  | 67.6%  | 69.7%  | 66.1%   | 4.5% |
| Glycyrrhetic acid 100 nM | 95.8%  | 98.1%  | 94.7%  | 96.2%   | 1.8% |

**Table S2.** Preliminary assay results of tested compounds against mouse 11 $\beta$ -HSD1 at 10.0 $\mu$ M.

| Compds no.               | Exp. 1 | Exp. 2 | Exp. 3 | Average | SD   |
|--------------------------|--------|--------|--------|---------|------|
| <b>1</b>                 | 39.3%  | 40.2%  | 35.6%  | 38.4%   | 2.5% |
| <b>2</b>                 | 41.6%  | 40.8%  | 33.4%  | 38.6%   | 4.5% |
| <b>3</b>                 | 44.9%  | 47.9%  | 40.2%  | 44.3%   | 3.9% |
| <b>4</b>                 | 35.8%  | 39.0%  | 32.1%  | 35.6%   | 3.5% |
| <b>5</b>                 | 95.6%  | 96.4%  | 91.5%  | 94.5%   | 2.6% |
| <b>6</b>                 | 74.2%  | 78.5%  | 73.9%  | 75.5%   | 2.6% |
| <b>7</b>                 | 67.8%  | 64.1%  | 59.9%  | 63.9%   | 3.9% |
| <b>8</b>                 | 28.2%  | 25.9%  | 25.6%  | 26.6%   | 1.4% |
| <b>9</b>                 | 38.7%  | 44.0%  | 36.7%  | 39.8%   | 3.8% |
| <b>10</b>                | 38.8%  | 42.0%  | 35.9%  | 38.9%   | 3.1% |
| Glycyrrhetic acid 1 nM   | 21.8%  | 17.4%  | 15.3%  | 18.2%   | 3.3% |
| Glycyrrhetic acid 10 nM  | 55.9%  | 52.7%  | 51.5%  | 53.4%   | 2.3% |
| Glycyrrhetic acid 100 nM | 93.3%  | 95.5%  | 95.9%  | 94.9%   | 1.4% |

**Figure S1.** Induced CD spectrum of the  $\text{Mo}_2^{4+}$  complex for **2** in DMSO

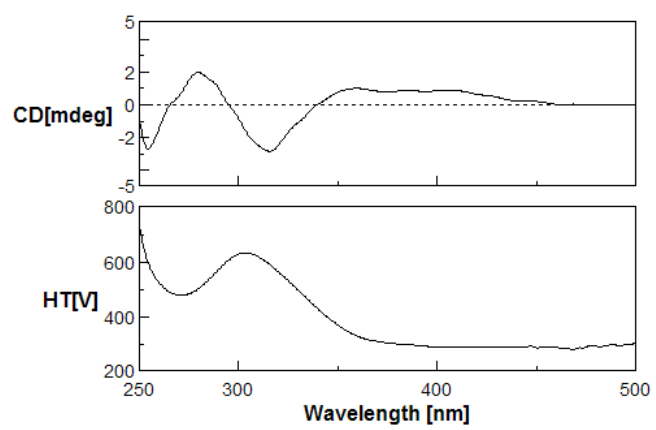

**Figure S2.** Induced CD spectrum of the  $\text{Mo}_2^{4+}$  complex for **5** in DMSO

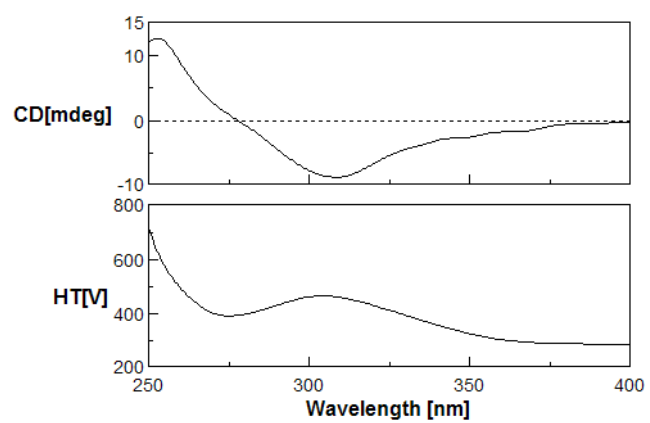

**Figure S3.**  $^1\text{H}$  NMR spectrum of ricinodol A (**1**) in  $\text{CDCl}_3$

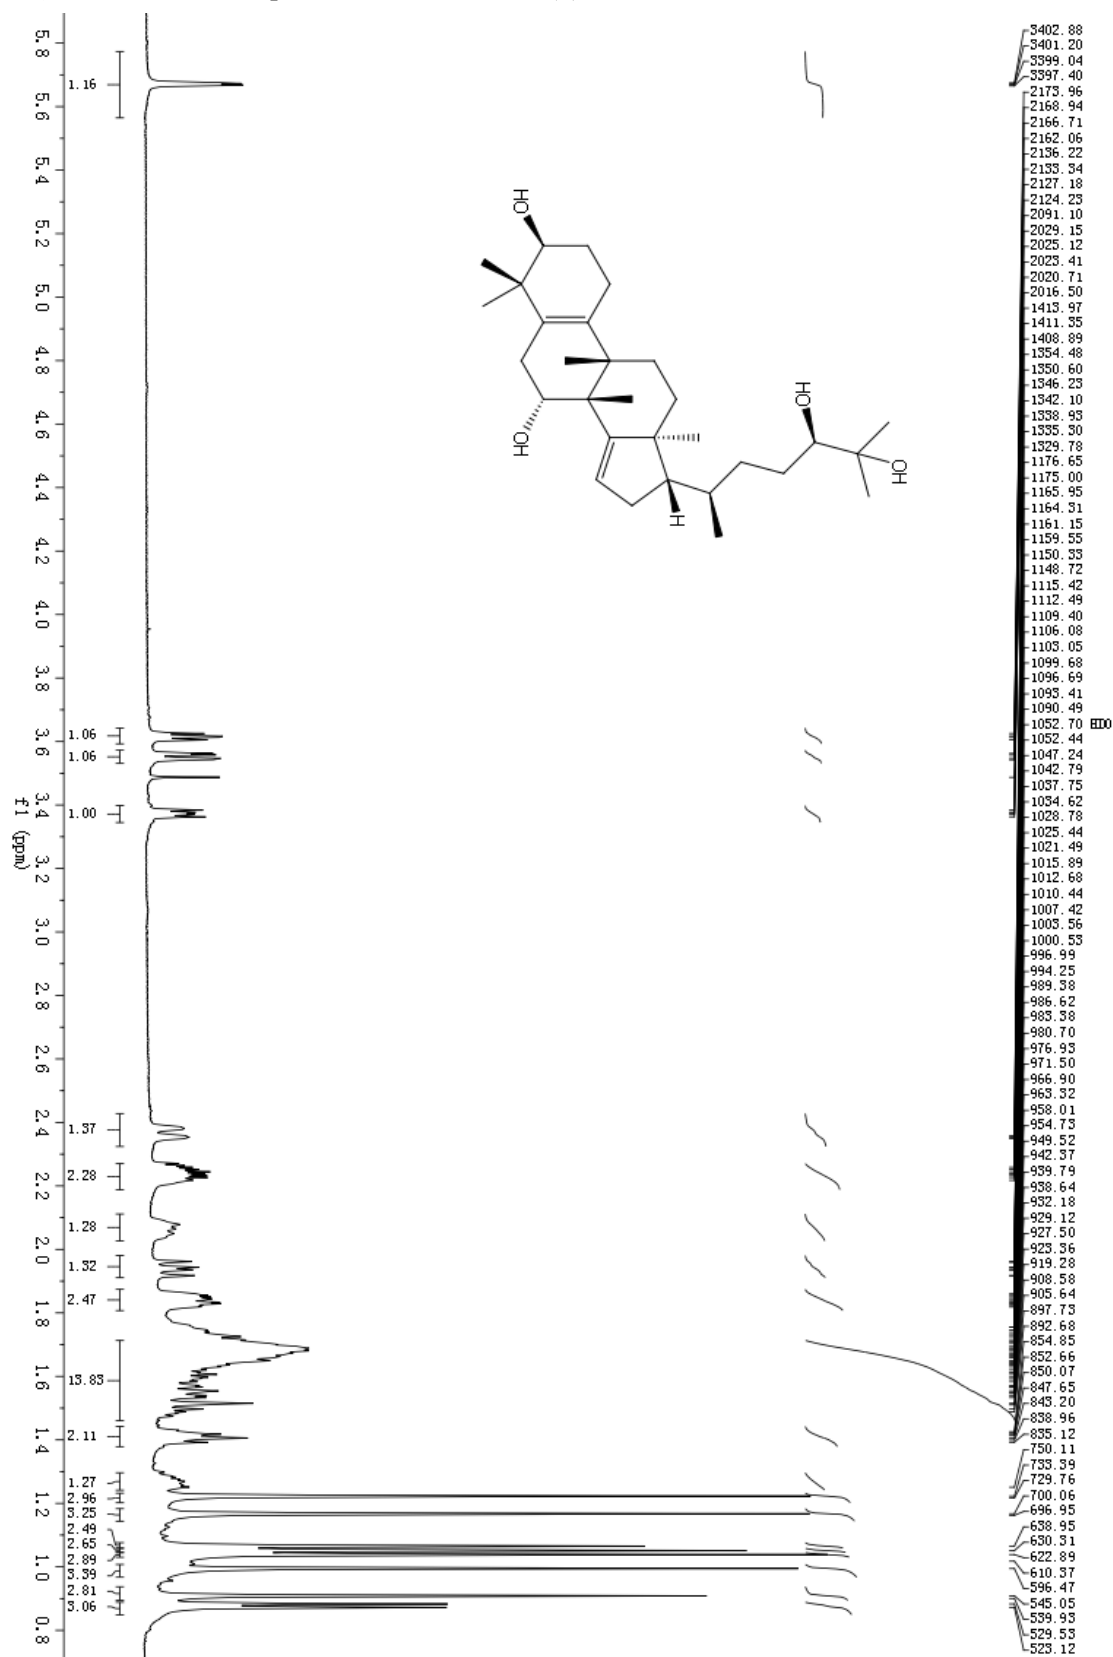



**Figure S4.**  $^{13}\text{C}$  NMR spectrum of ricinodol A (**1**) in  $\text{CDCl}_3$

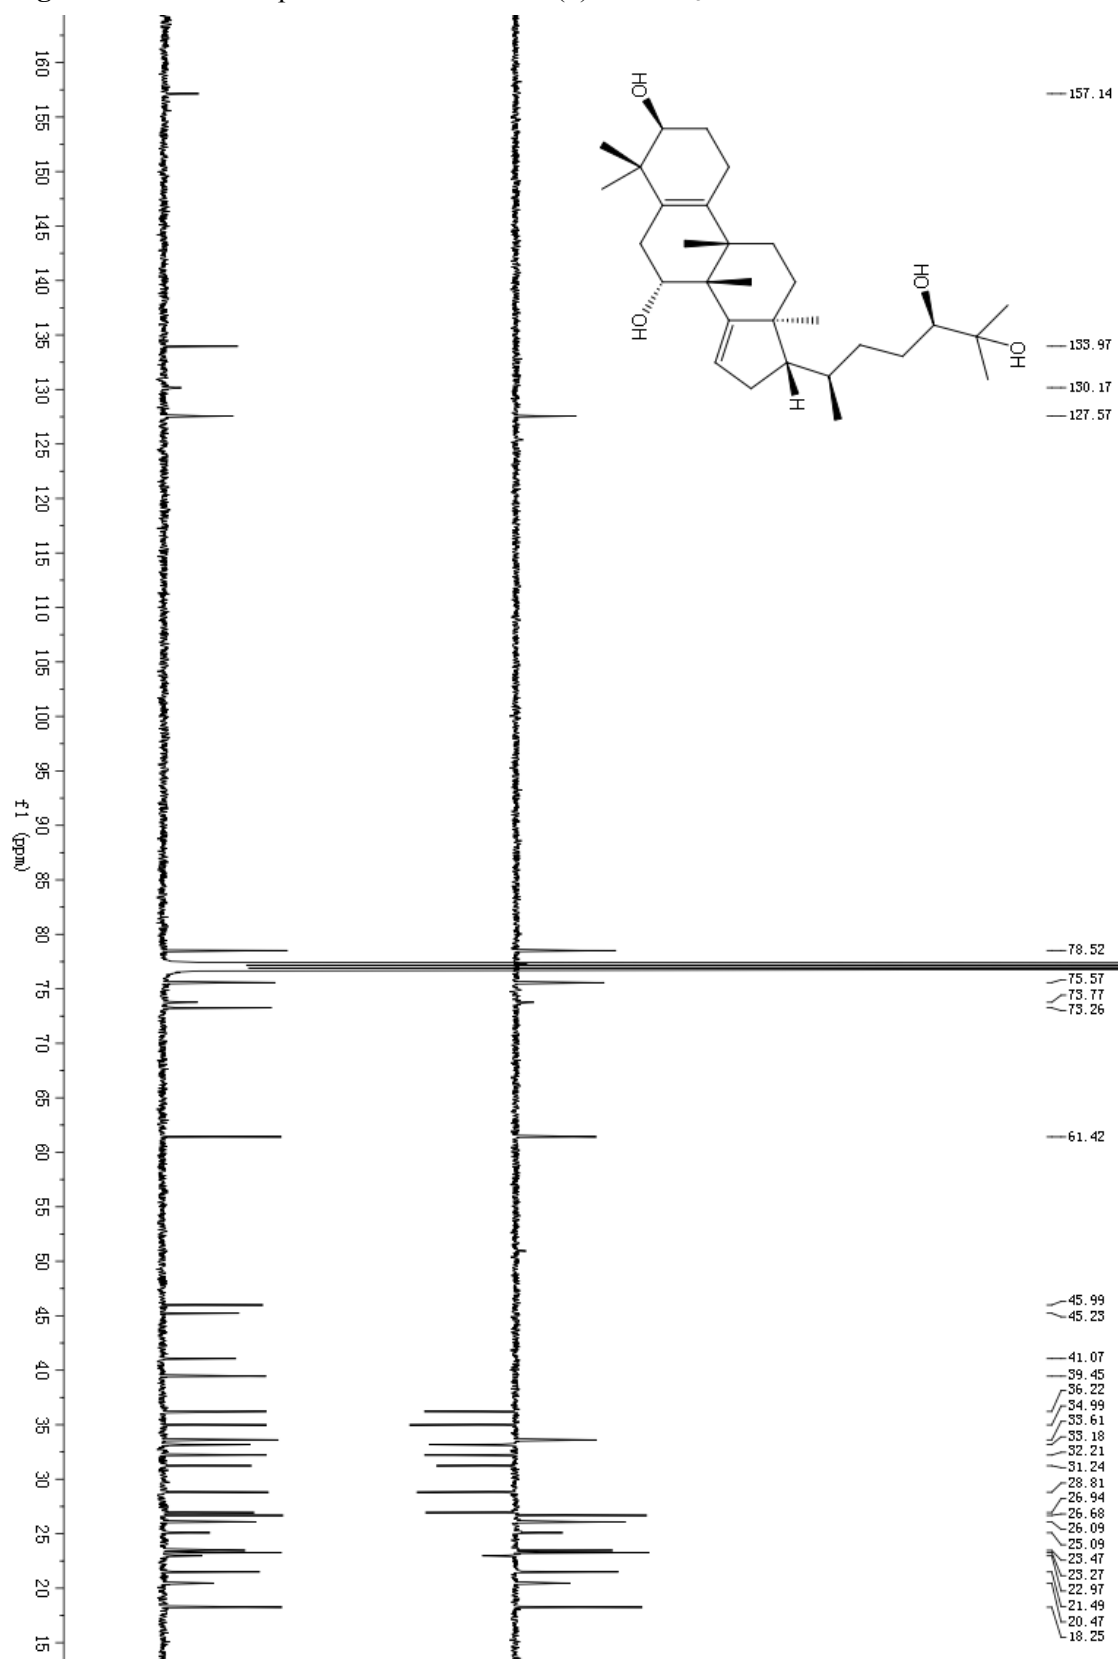

**Figure S5.** HSQC spectrum of ricinodol A (**1**) in CDCl<sub>3</sub>

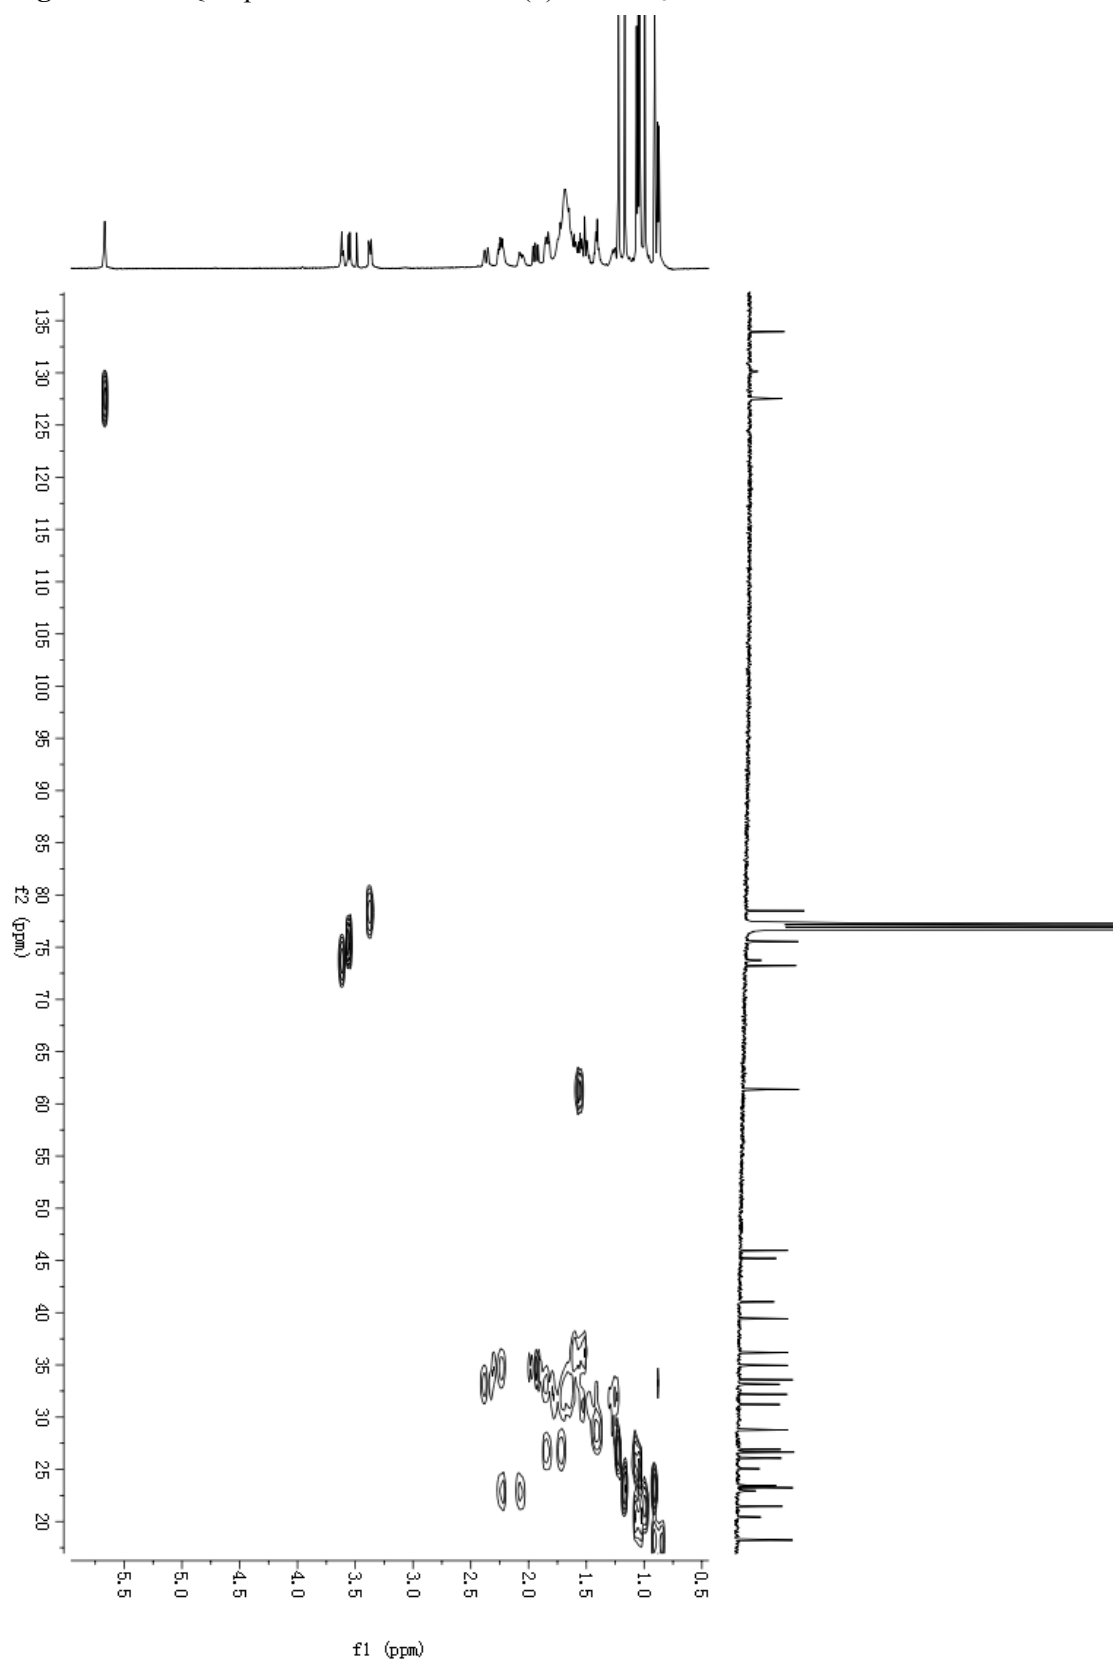

**Figure S6.**  $^1\text{H}$ - $^1\text{H}$  COSY spectrum of ricinodol A (**1**) in  $\text{CDCl}_3$

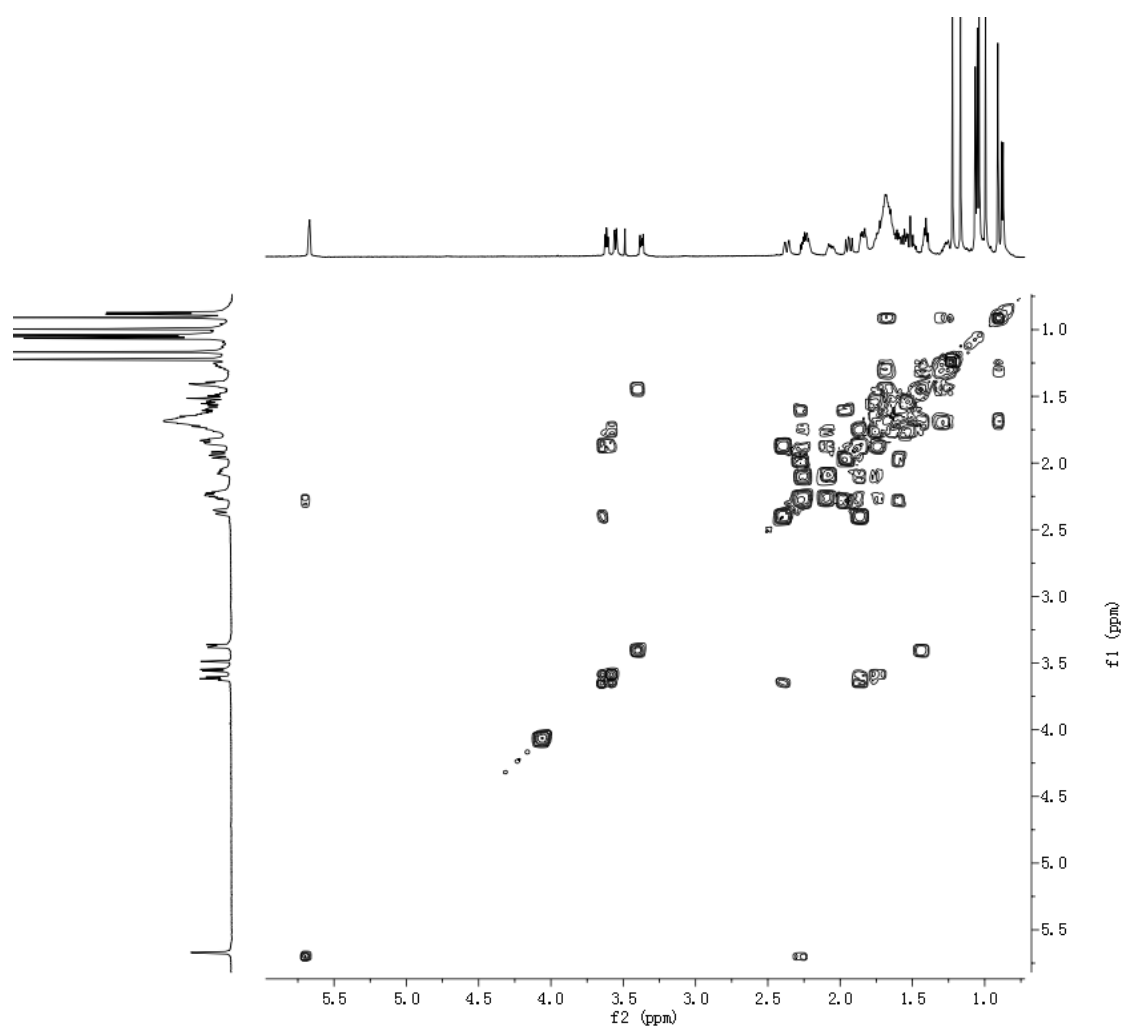

**Figure S7.** HMBC spectrum of ricinodol A (**1**) in CDCl<sub>3</sub>

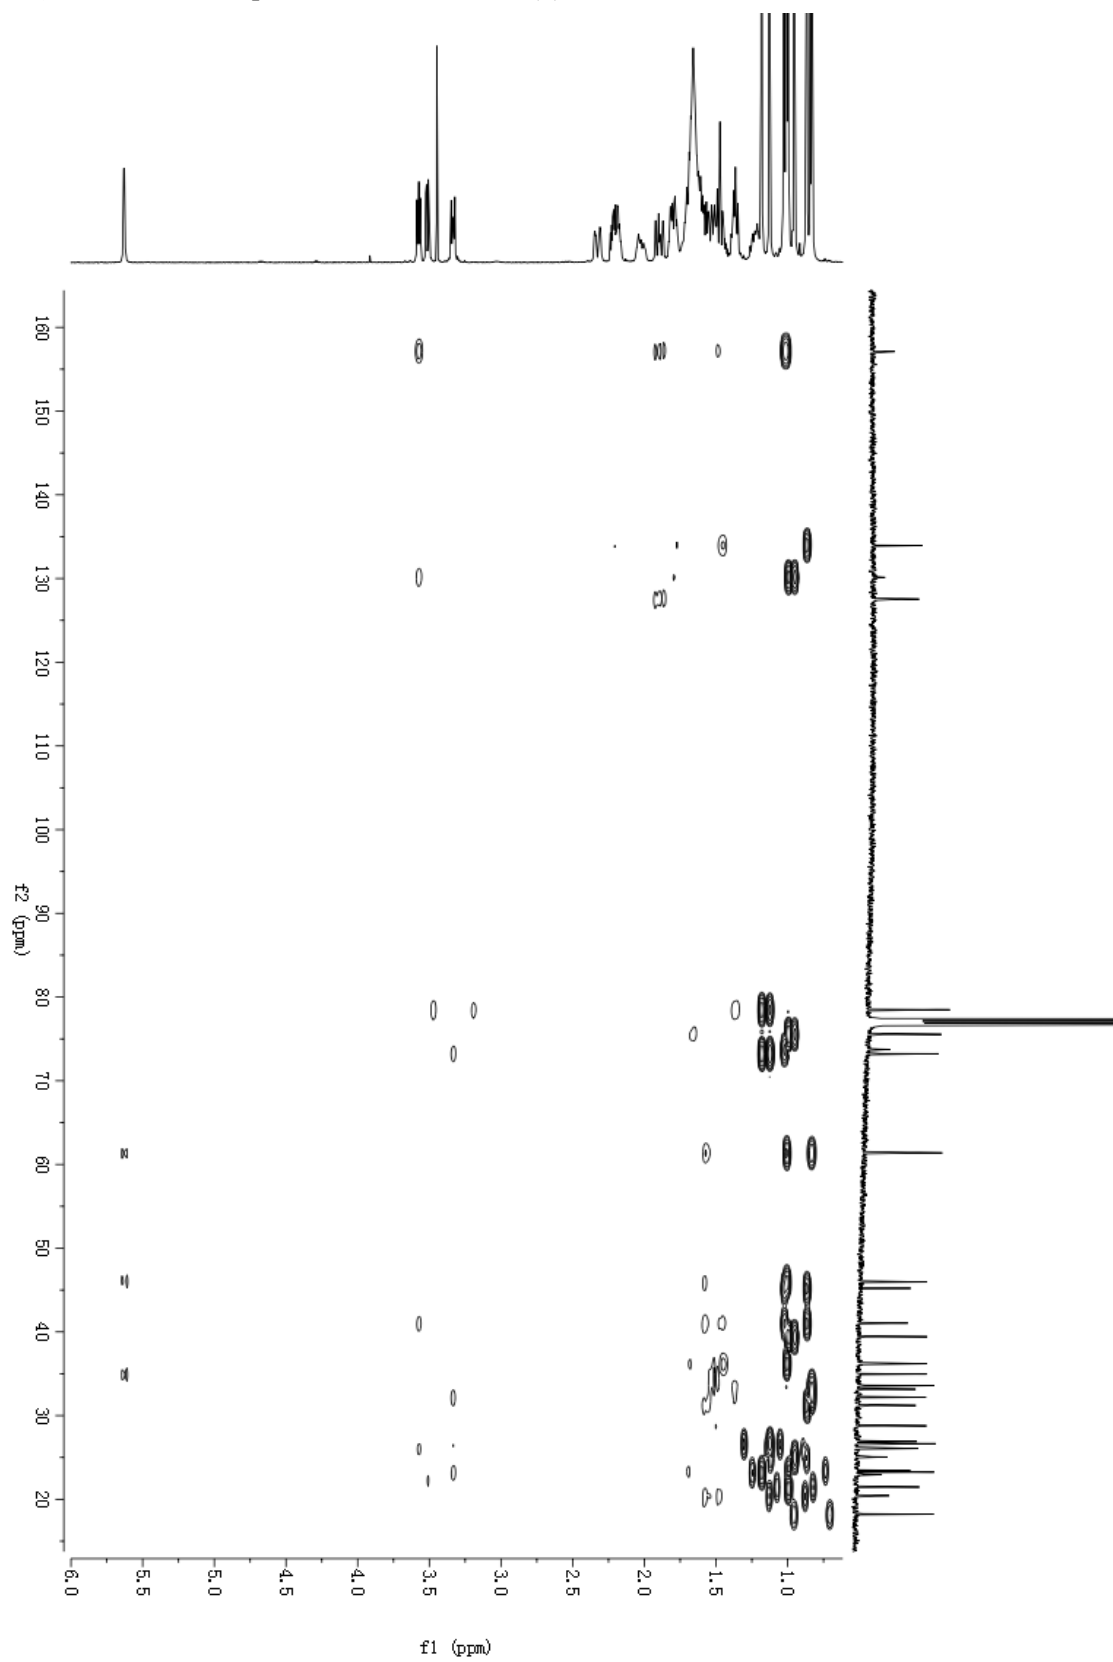

Figure S8. ROESY spectrum of ricinodol A (1) in CDCl<sub>3</sub>

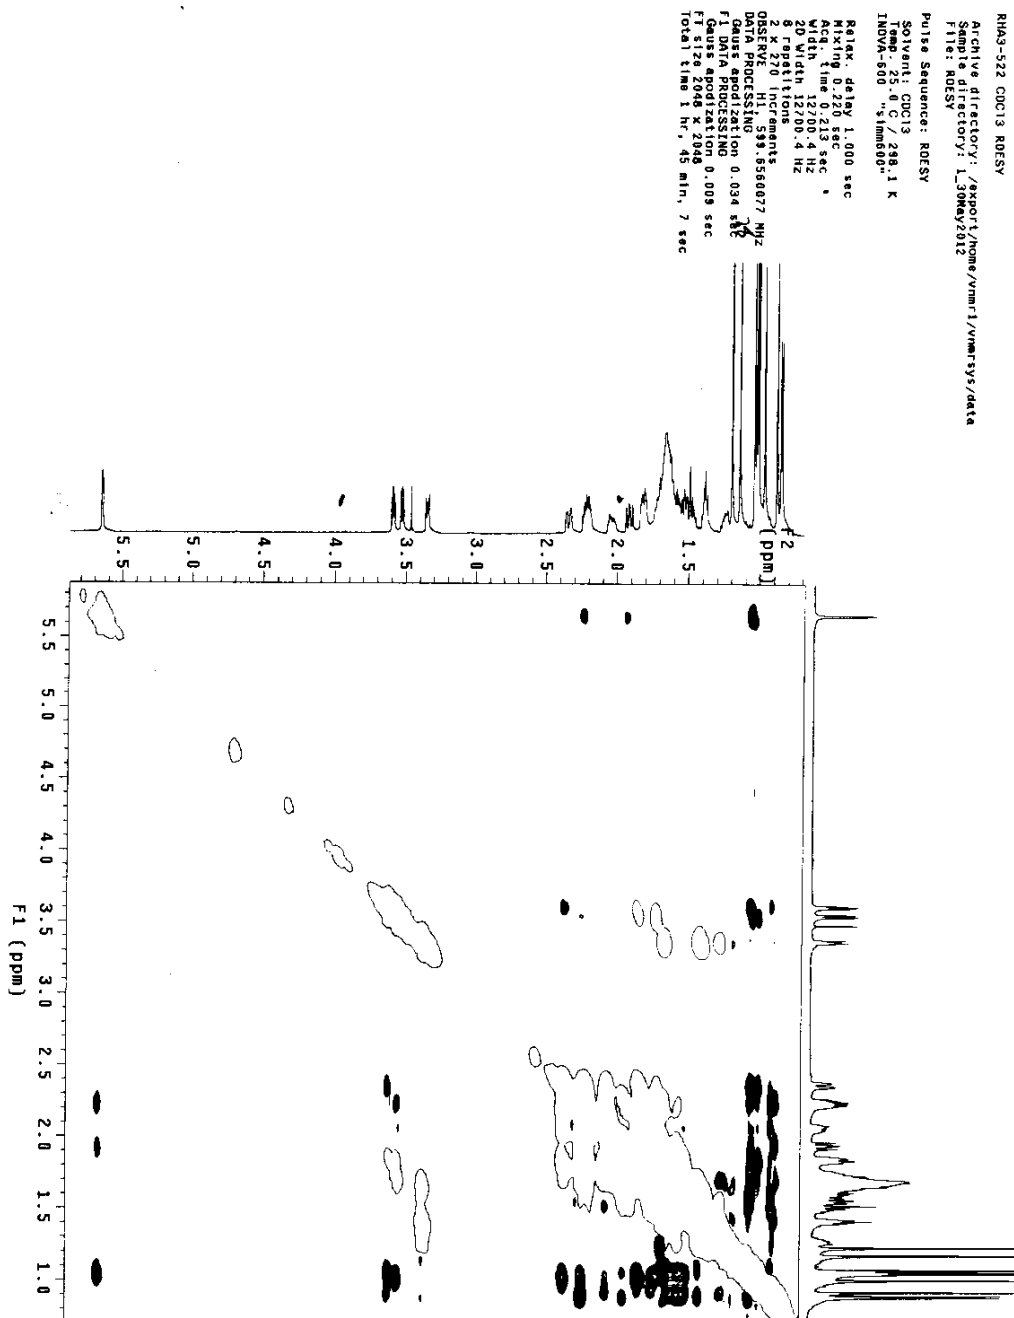

Figure S9. ESI(+)-MS spectrum of ricinodol A (1)

### Display Report

**Analysis Info**

|               |                    |                  |                   |
|---------------|--------------------|------------------|-------------------|
| Analysis Name | 002-0501.D         | Acquisition Date | 05/30/12 09:59:26 |
| Method        | Copy of DSOPMS2P.M | Operator         | Administrator     |
| Sample Name   | yjm-RHA3-5212      | Instrument       | esquire3000plus   |
| Comment       | *)□                |                  |                   |

**Acquisition Parameter**

|                   |            |              |           |                          |          |
|-------------------|------------|--------------|-----------|--------------------------|----------|
| Ion Source Type   | ESI        | Ion Polarity | Positive  | Alternating Ion Polarity | off      |
| Mass Range Mode   | Std/Normal | Scan Begin   | 100 m/z   | Scan End                 | 1750 m/z |
| Capillary Exit    | 158.5 Volt | Skim 1       | 40.0 Volt | Trap Drive               | 85.4     |
| Accumulation Time | 15000      | Averages     | 3 Spectra | Auto MS/MS               | on       |

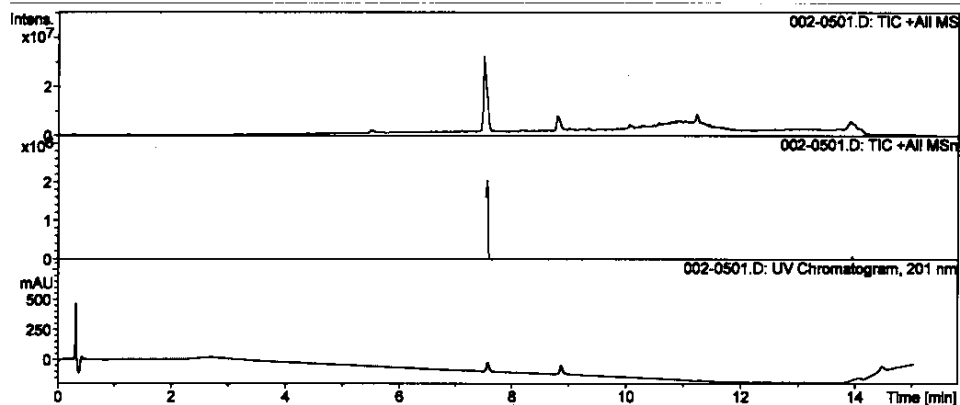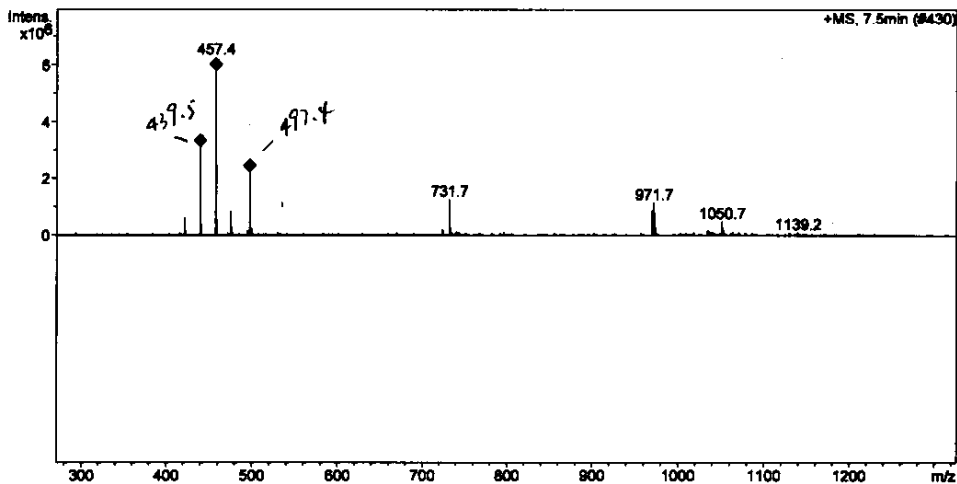

Figure S10. ESI(-)MS spectrum of ricinodol A (1)

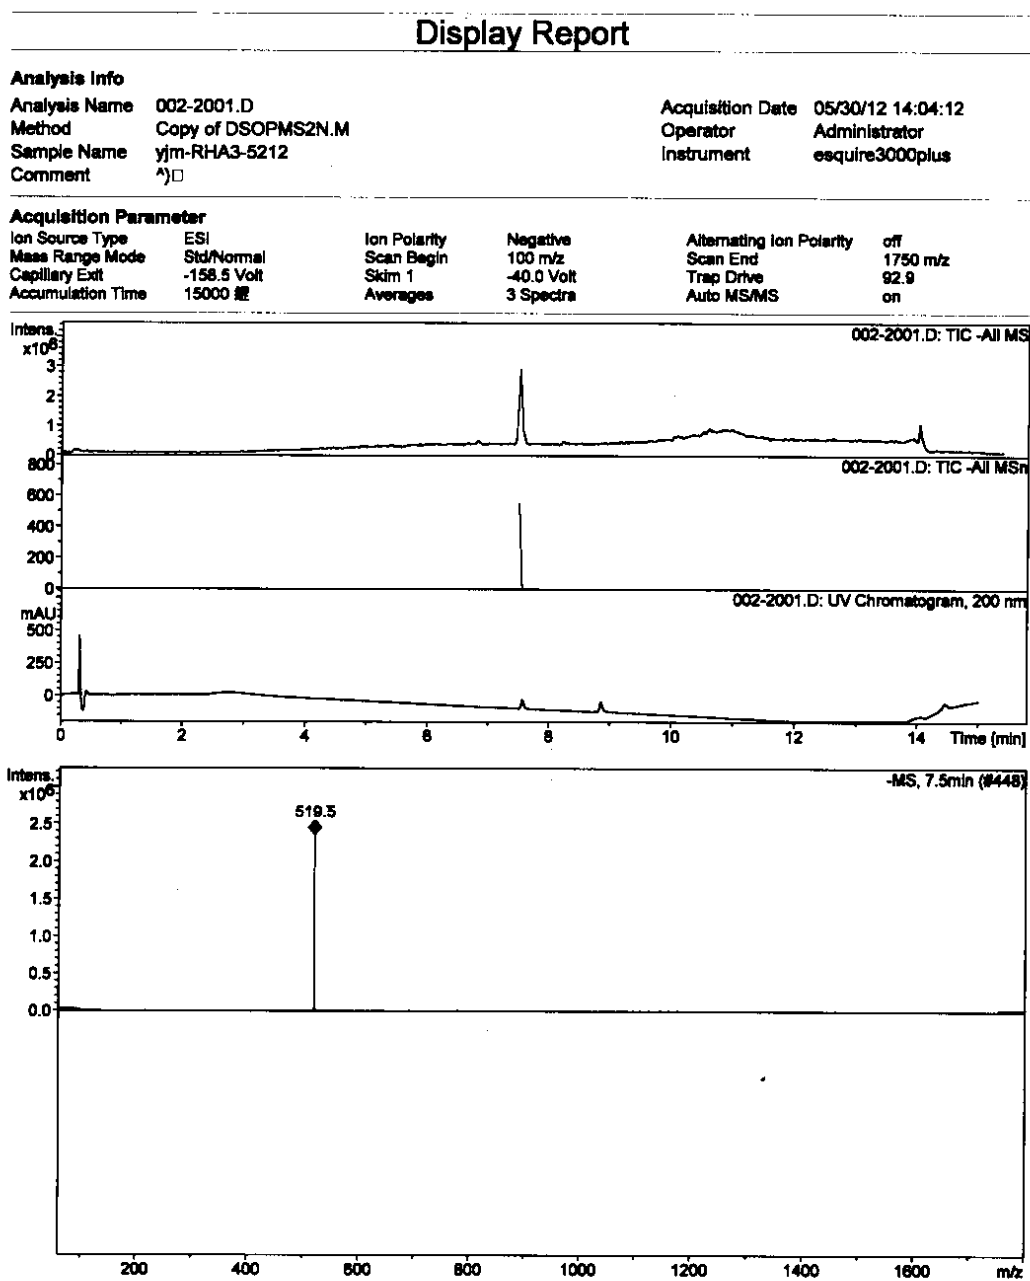

Figure S11. HRESI(-)MS spectrum of ricinodol A (1)

Elemental Composition Report

Page 1

Single Mass Analysis

Tolerance = 3.0 PPM / DBE: min = -1.5, max = 50.0

Element prediction: Off

Number of isotope peaks used for i-FIT = 3

Monoisotopic Mass, Even Electron Ions

121 formula(e) evaluated with 1 results within limits (up to 50 closest results for each mass)

Elements Used:

C: 10-60 H: 1-110 O: 0-30

YJH

LCT PXE KE324

01-Jun-2012

14:26:51

RHA3-5212 20 (0.422) AM2 (Ar:10000.0,0.00,1.00); ABS; Cm (14:48)

1: TOF MS ES-

2.25e+004

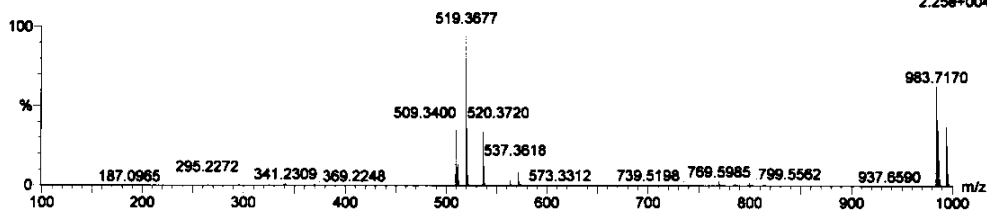

Minimum:

Maximum: 3.0 3.0 -1.5

50.0

| Mass     | Calc. Mass | mDa  | PPM  | DBE | i-FIT | i-FIT (Norm) | Formula    |
|----------|------------|------|------|-----|-------|--------------|------------|
| 519.3677 | 519.3686   | -0.9 | -1.7 | 6.5 | 102.3 | 0.0          | C31 H51 O6 |



Figure S12. IR spectrum of ricinodol A (1)

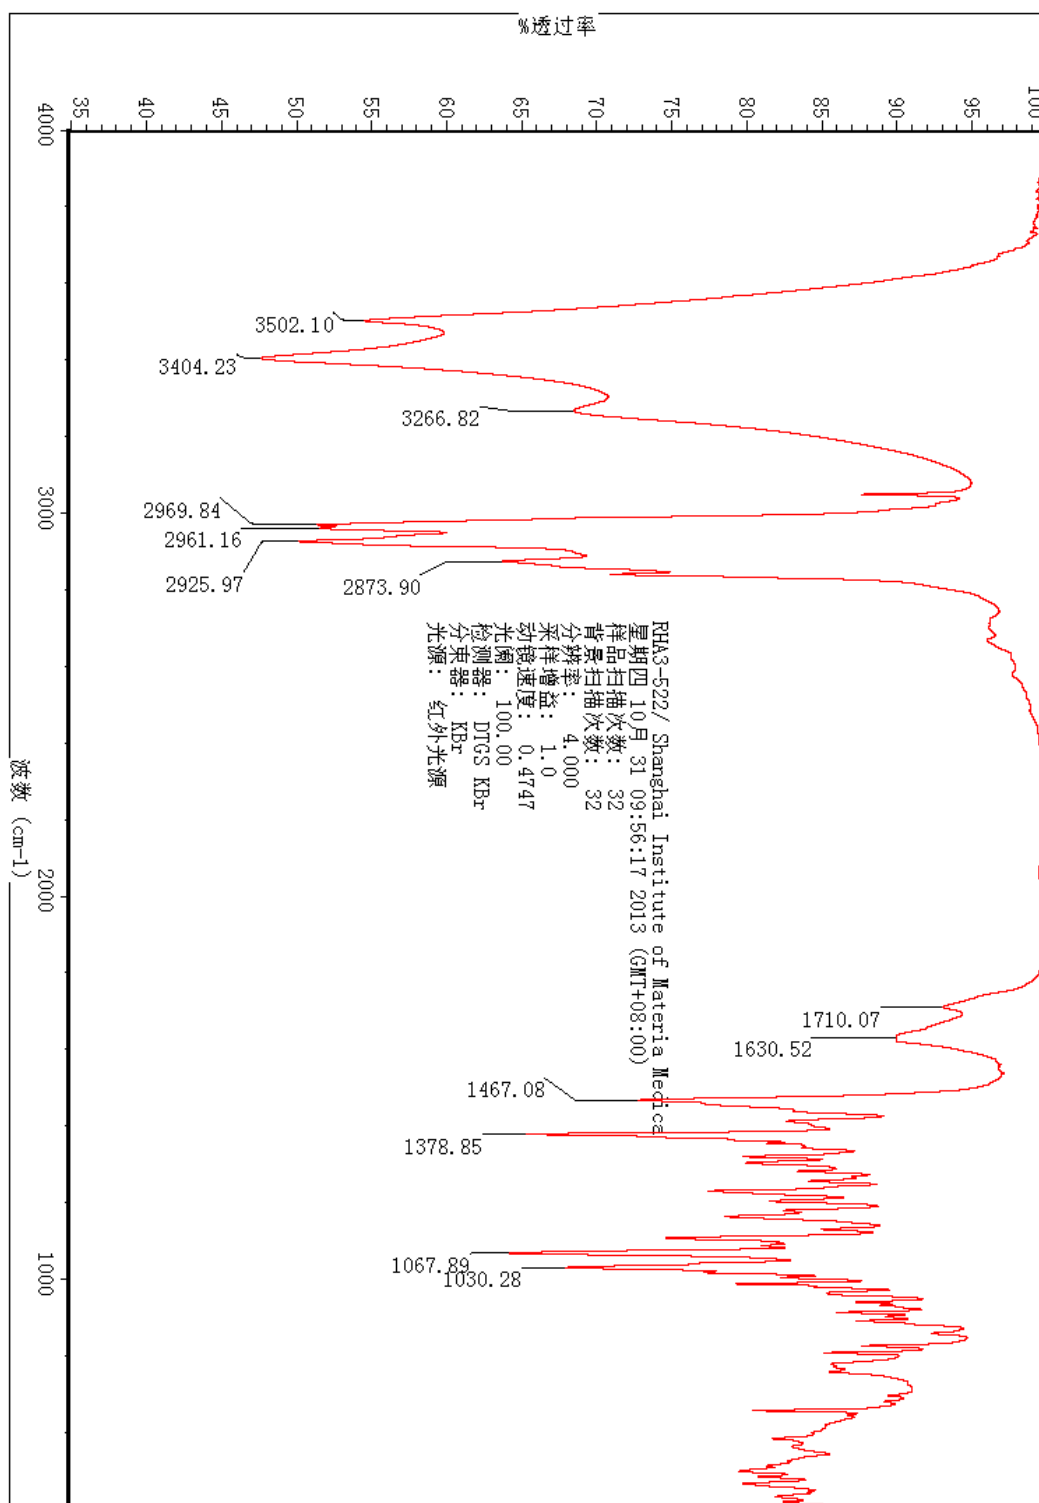

**Figure S13.**  $^1\text{H}$  NMR spectrum of ricinodol B (2) in  $\text{CDCl}_3$

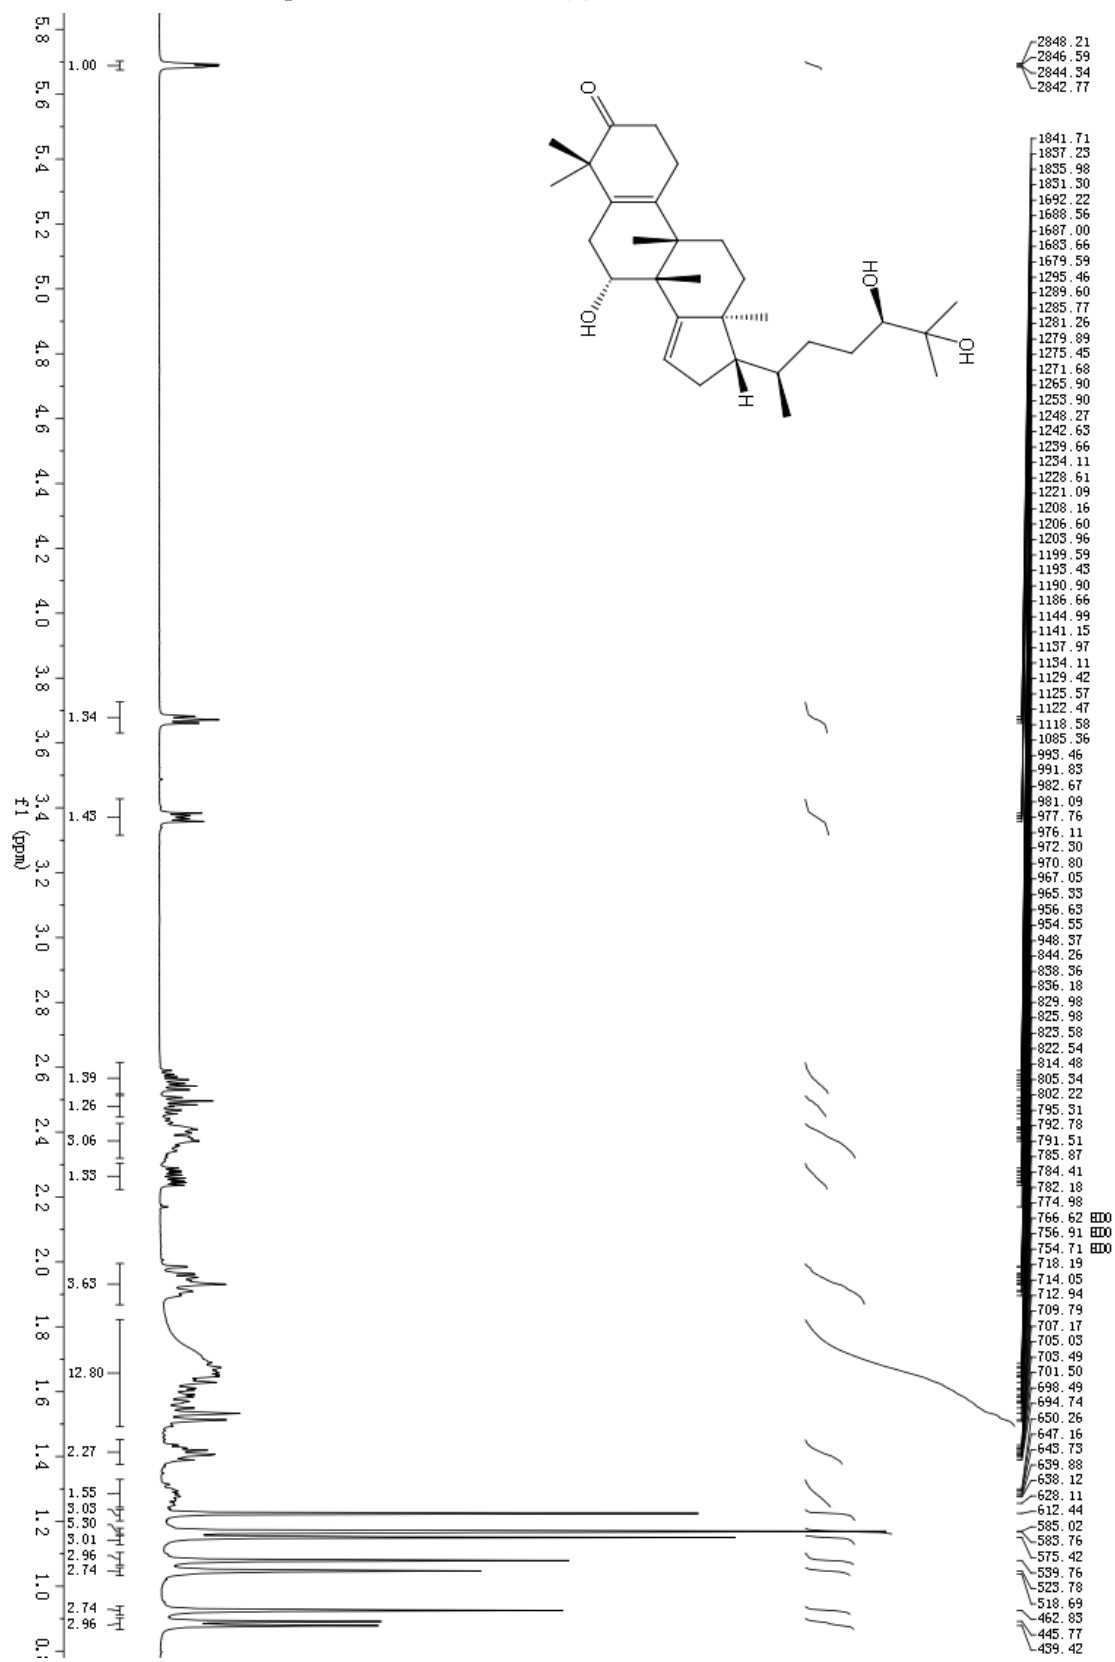

**Figure S14.**  $^{13}\text{C}$  NMR spectrum of ricinodol B (**2**) in  $\text{CDCl}_3$

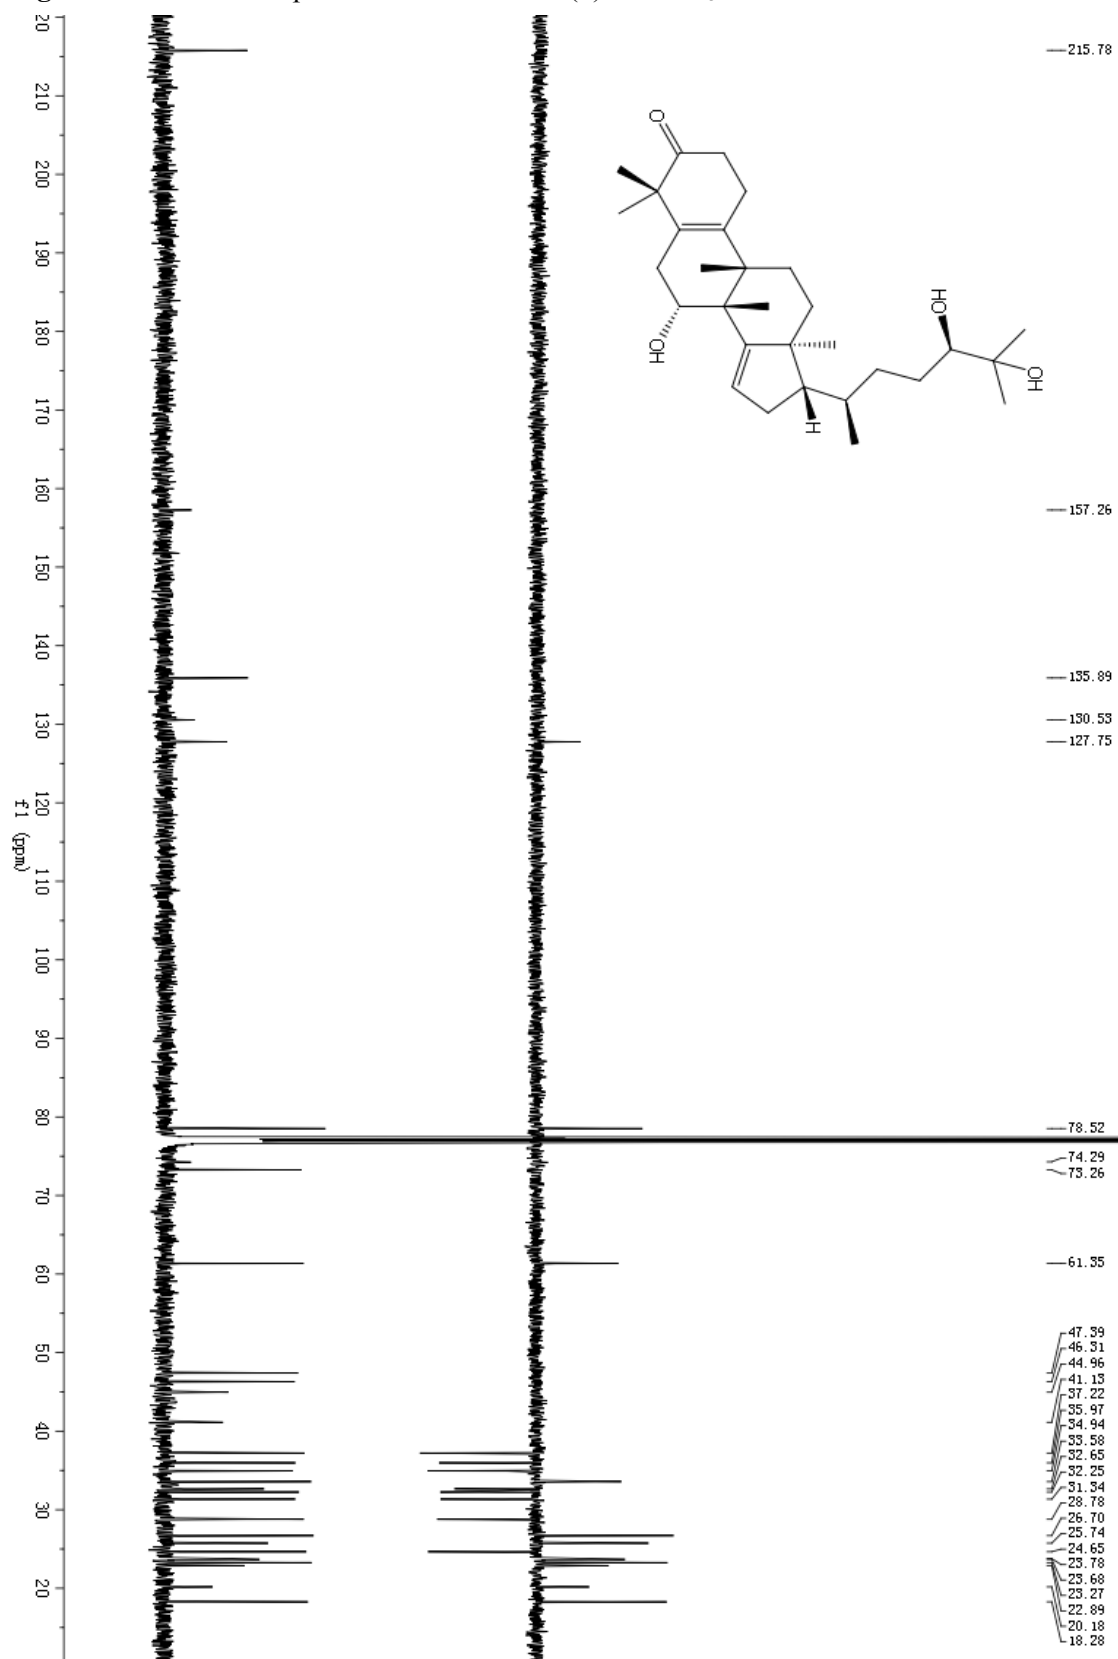

**Figure S15.** HSQC spectrum of ricinodol B (**2**) in CDCl<sub>3</sub>

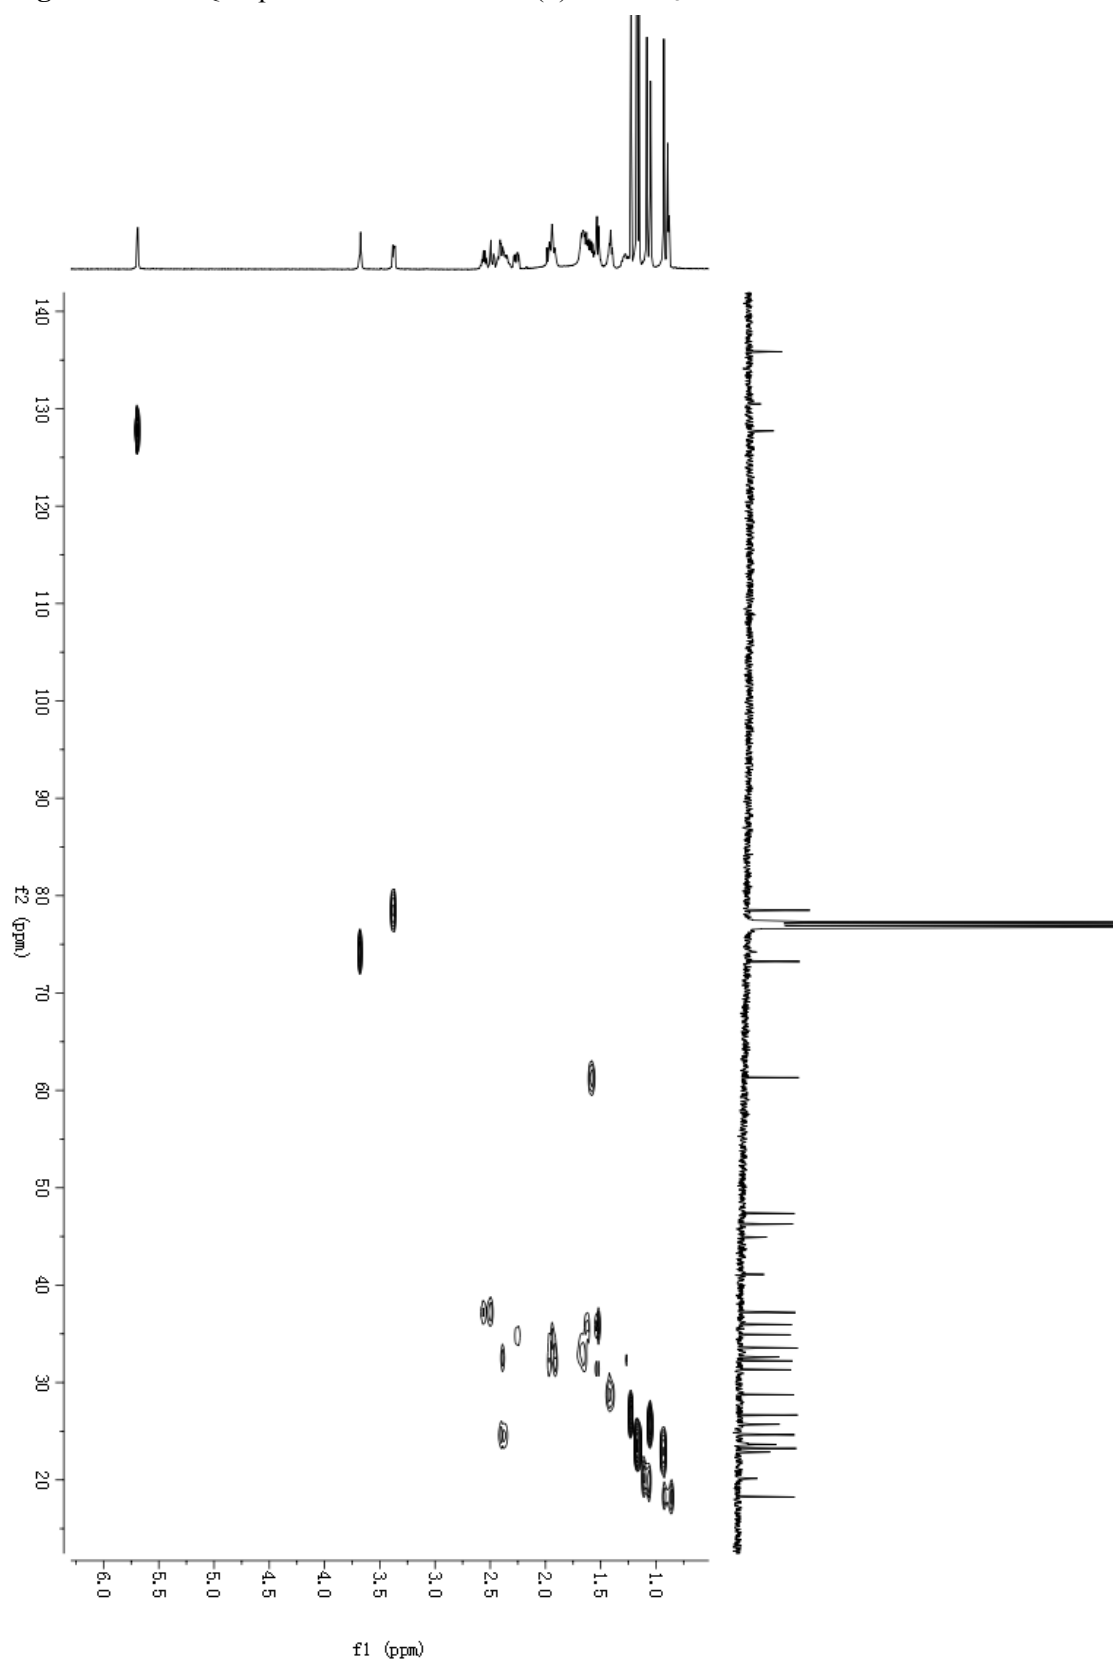

**Figure S16.** HMBC spectrum of ricinodol B (**2**) in CDCl<sub>3</sub>

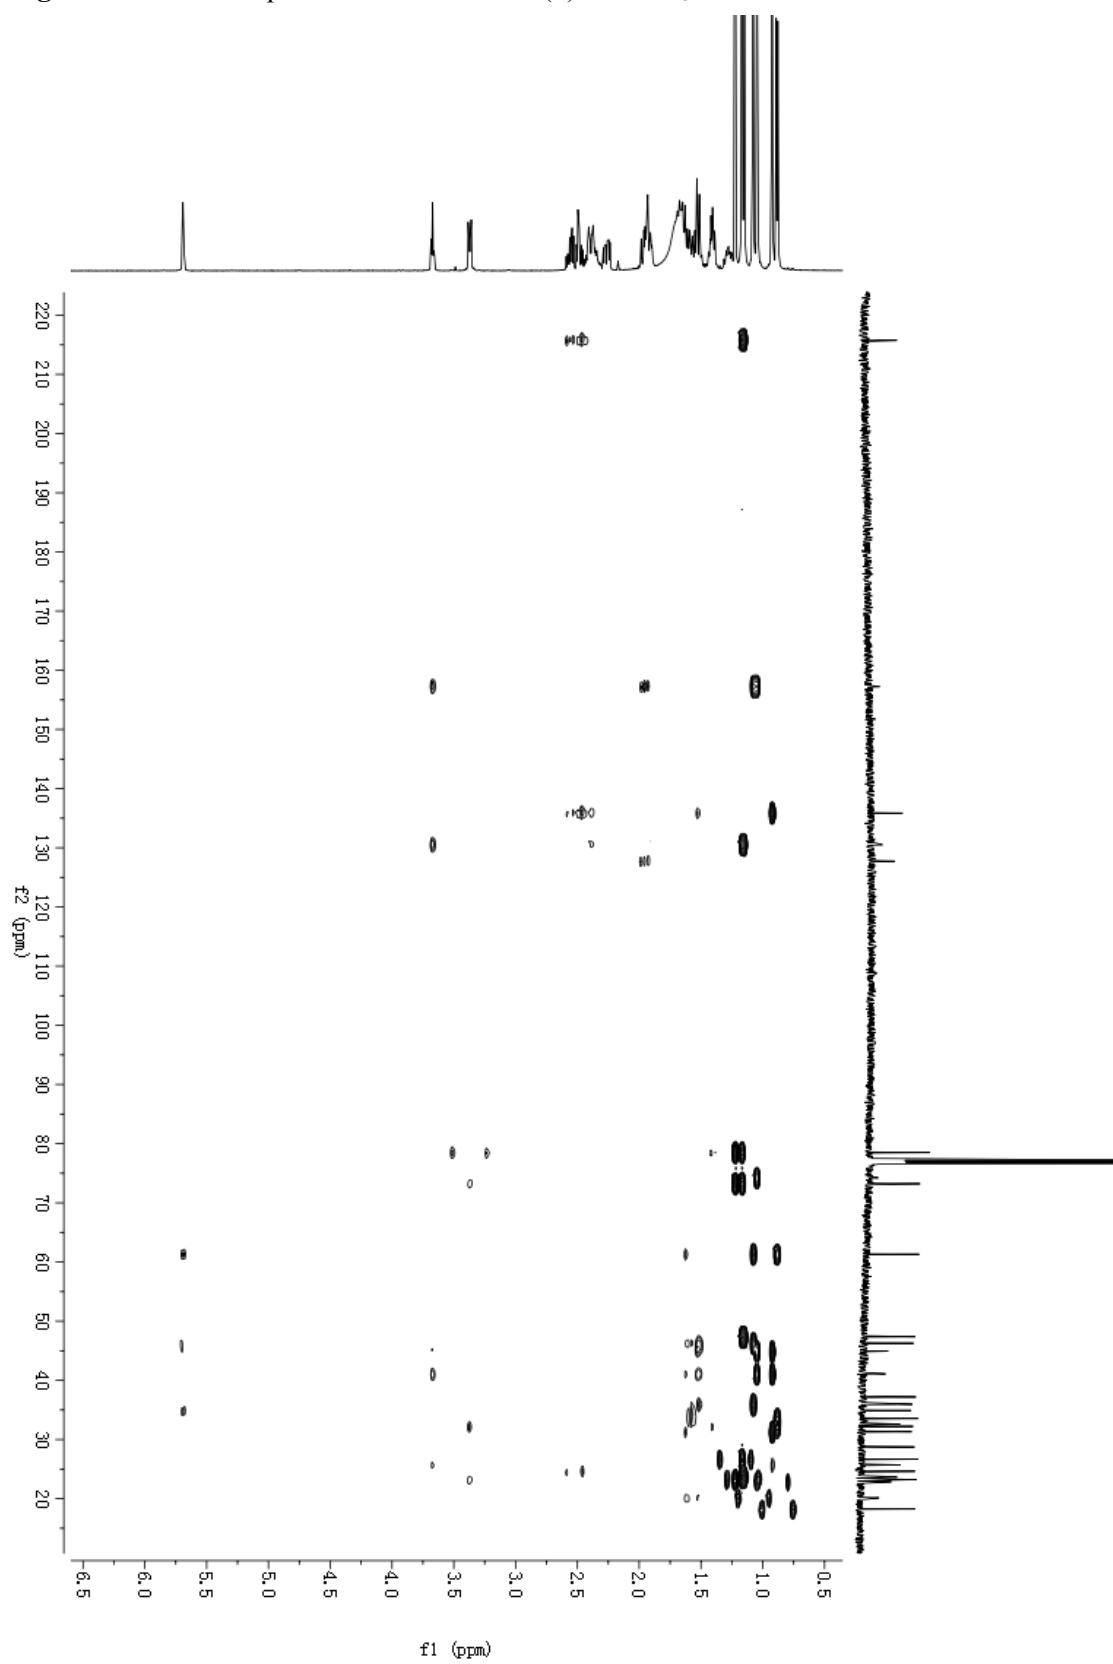

Figure S17. ROESY spectrum of ricinodol B (2) in CDCl<sub>3</sub>

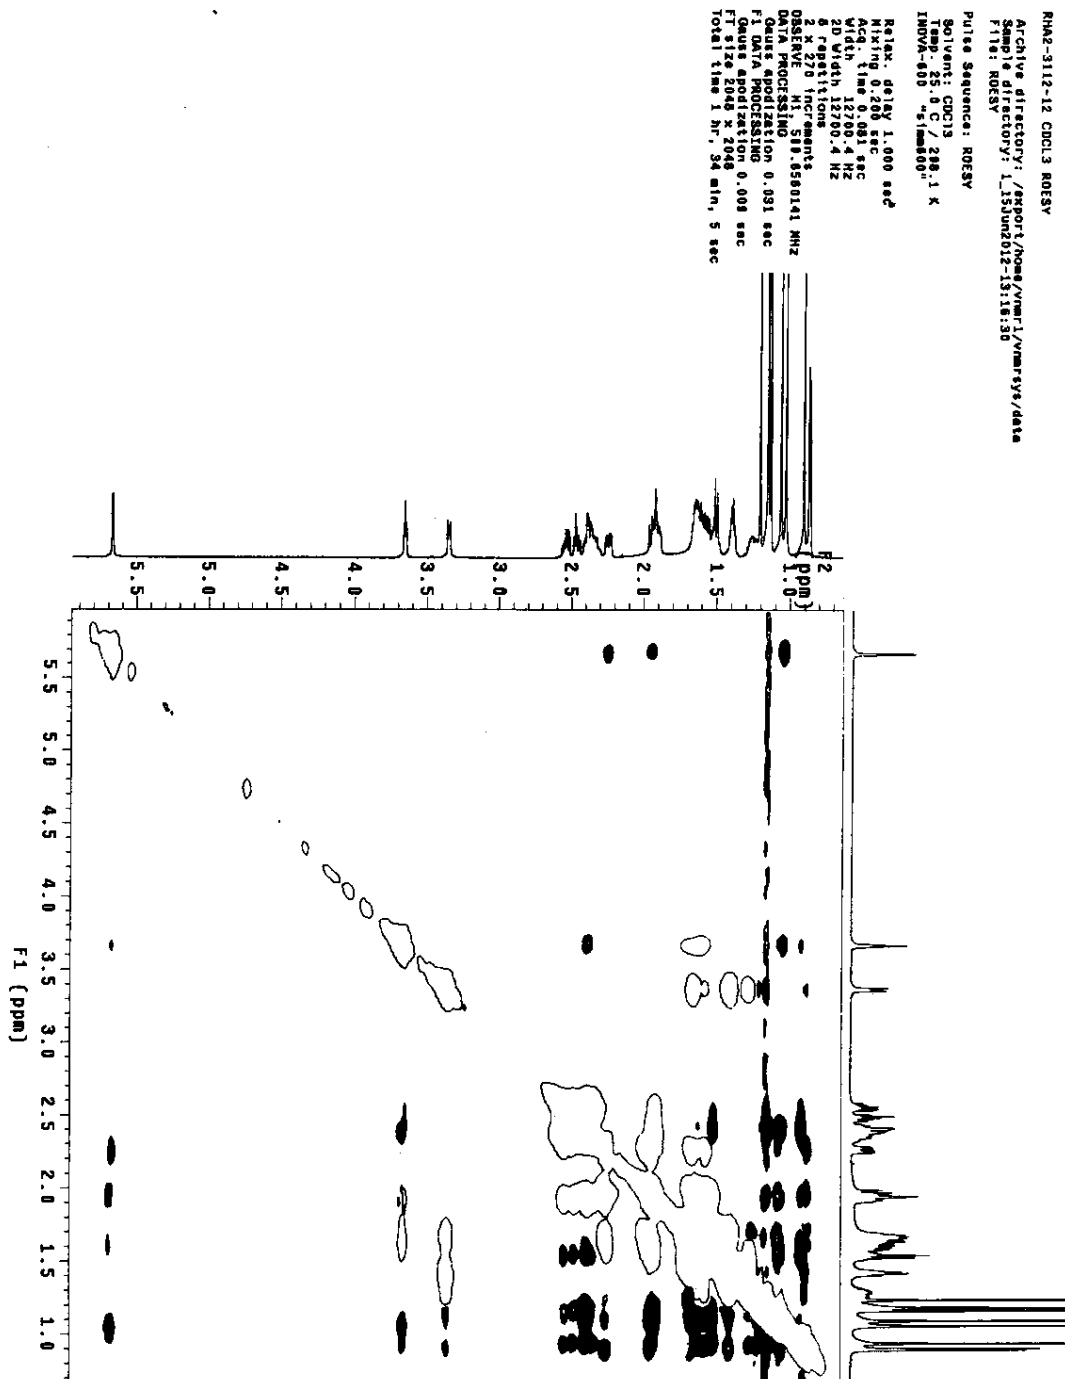

Figure S18. ESI(+)MS spectrum of ricinodol B (2)

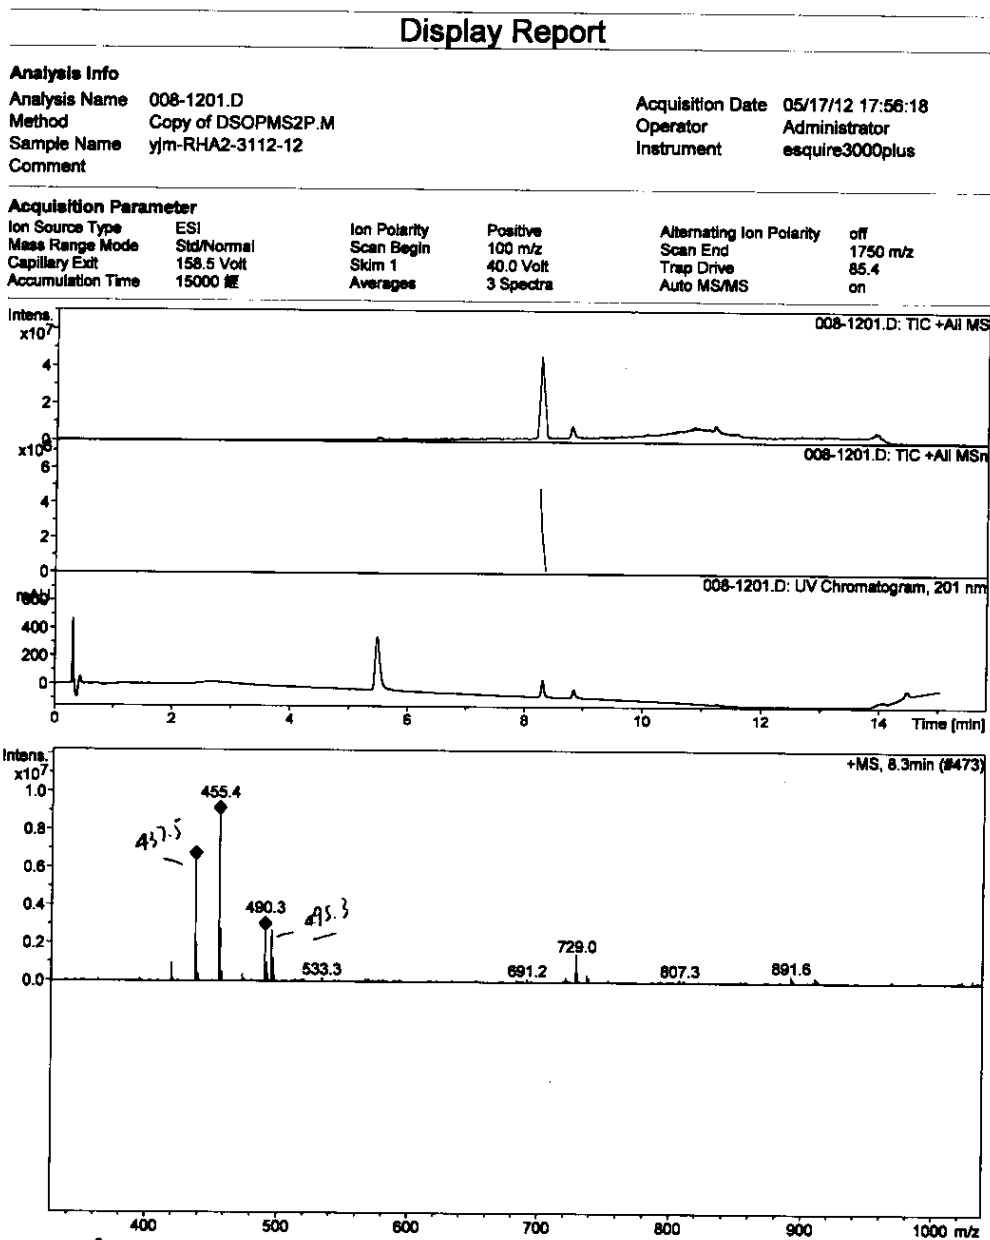

Figure S19. ESI(-)MS spectrum of ricinodol B (2)

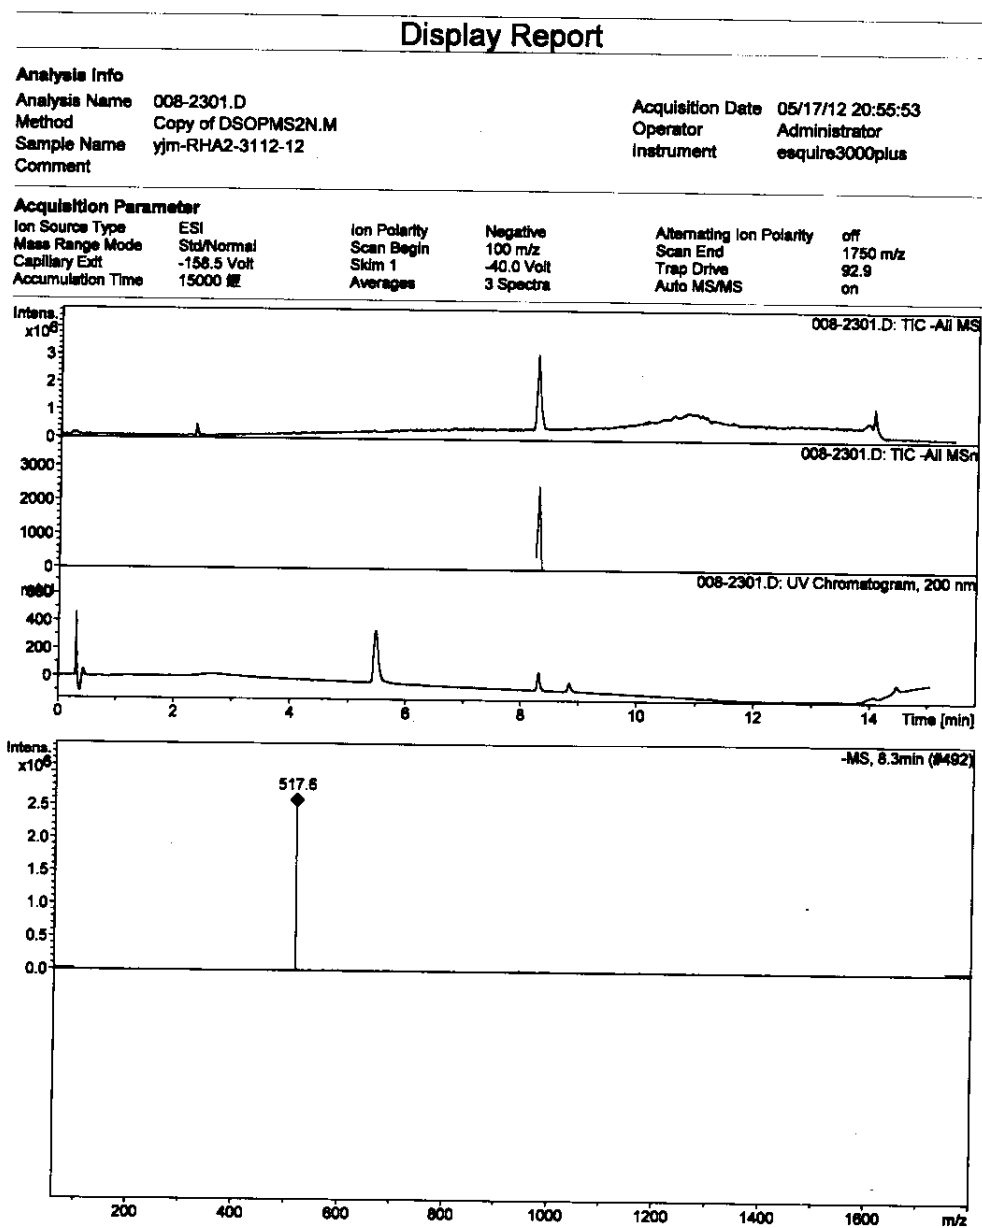



Figure S20. HRESI(+)-MS spectrum of ricinodol B (2)

Elemental Composition Report

Single Mass Analysis

Tolerance = 3.0 PPM / DBE: min = -1.5, max = 50.0

Element prediction: Off

Number of isotope peaks used for i-FIT = 3

Monoisotopic Mass, Even Electron Ions

213 formula(e) evaluated with 1 results within limits (up to 50 best isotopic matches for each mass)

Elements Used:

C: 10-60 H: 1-110 O: 0-30 Na: 0-1

YJH

LCT PXE KE324

18-May-2012

14:01:43

1: TOF MS ES+

3.25e+004

967.7043

RHA2-3112-12 39 (0.847) AM2 (Ar,10000.0,0.00,1.00); ABS; Cm (33:53)

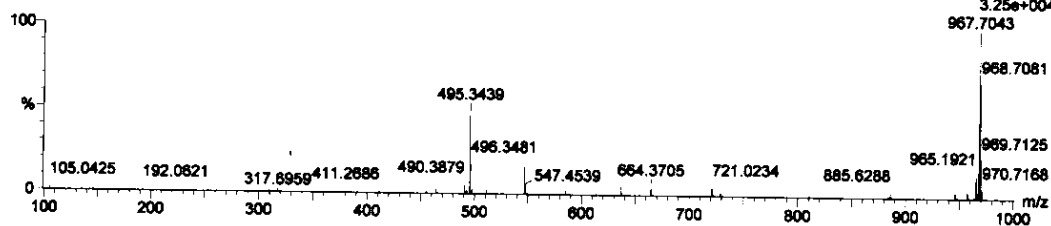

Minimum:

Maximum: 3.0 3.0 -1.5

| Mass     | Calc. Mass | mDa  | PPM  | DBE | i-FIT | i-FIT (Norm) | Formula       |
|----------|------------|------|------|-----|-------|--------------|---------------|
| 495.3439 | 495.3450   | -1.1 | -2.2 | 6.5 | 70.0  | 0.0          | C30 H48 O4 Na |

Figure S21. IR spectrum of ricinodol B (2)

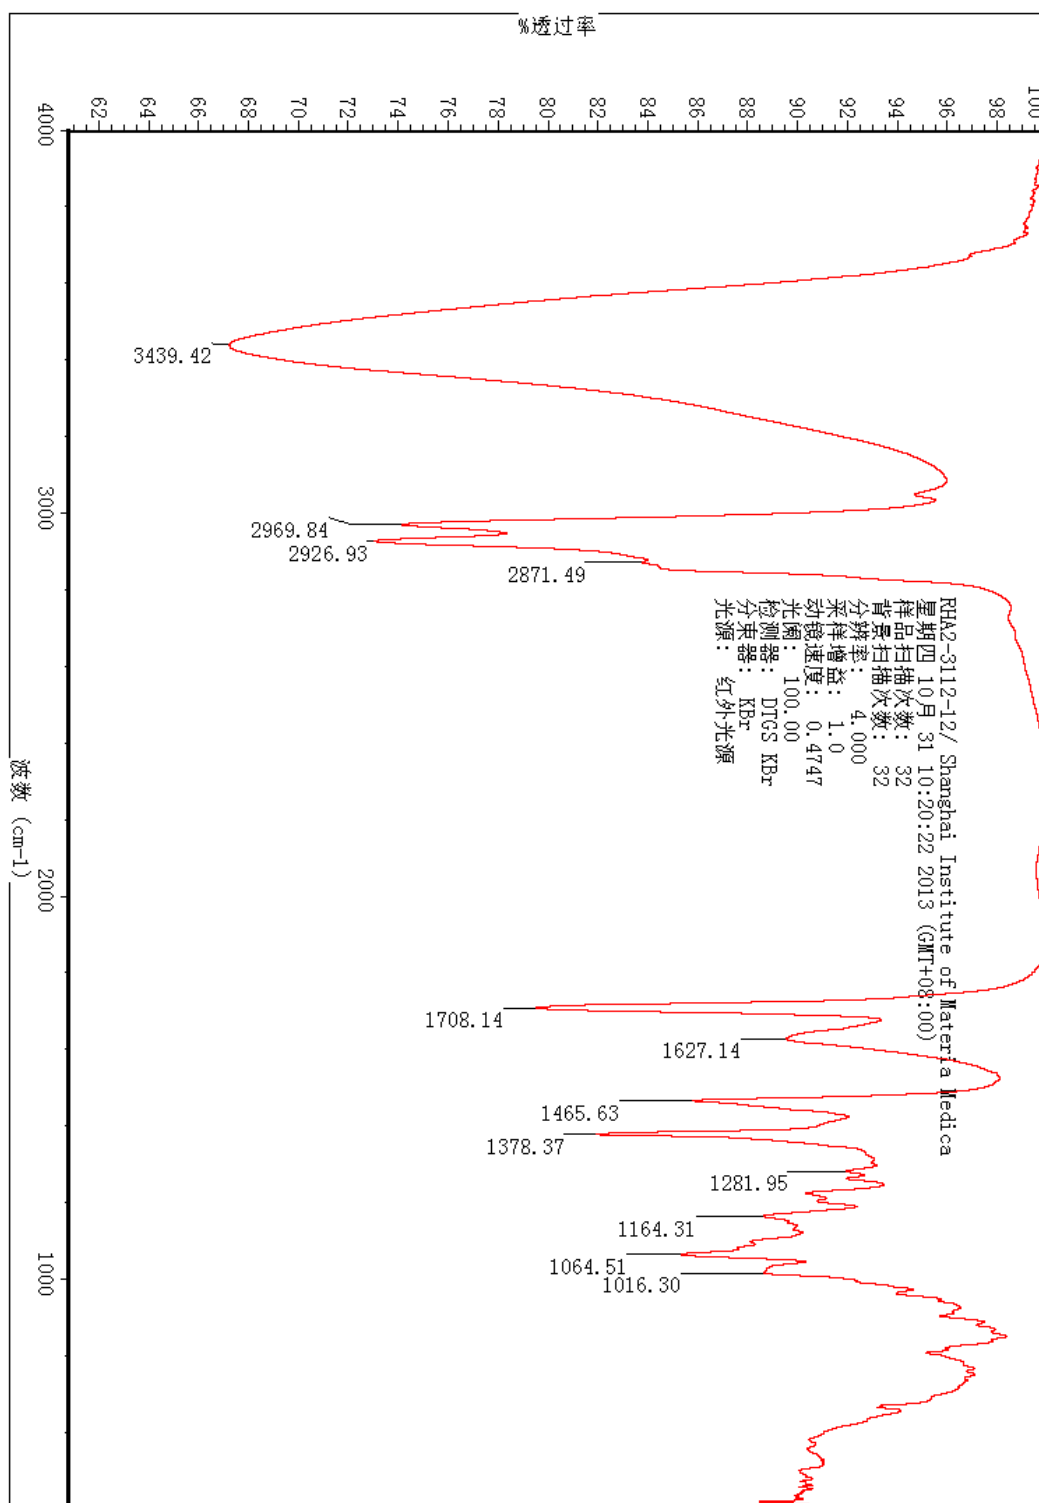

**Figure S22.**  $^1\text{H}$  NMR spectrum of ricinodol C (**3**) in  $\text{CDCl}_3$

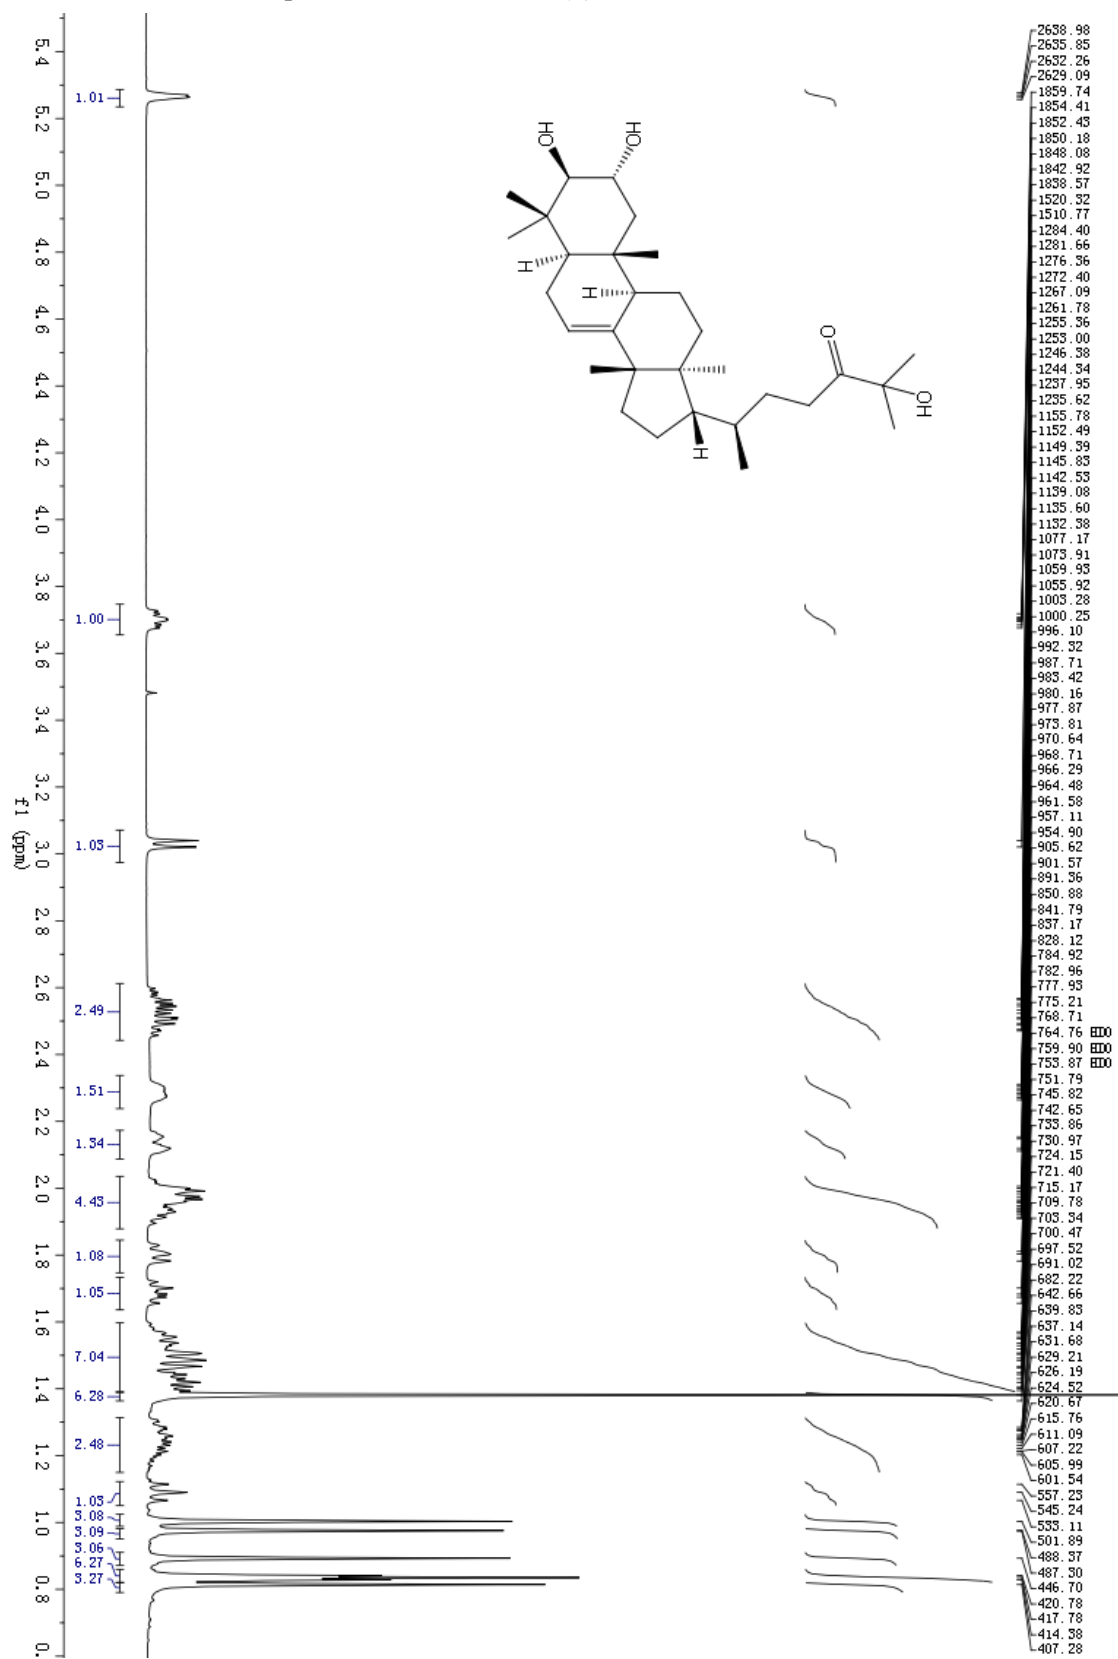

**Figure S23.**  $^{13}\text{C}$  NMR spectrum of ricinodol C (**3**) in  $\text{CDCl}_3$

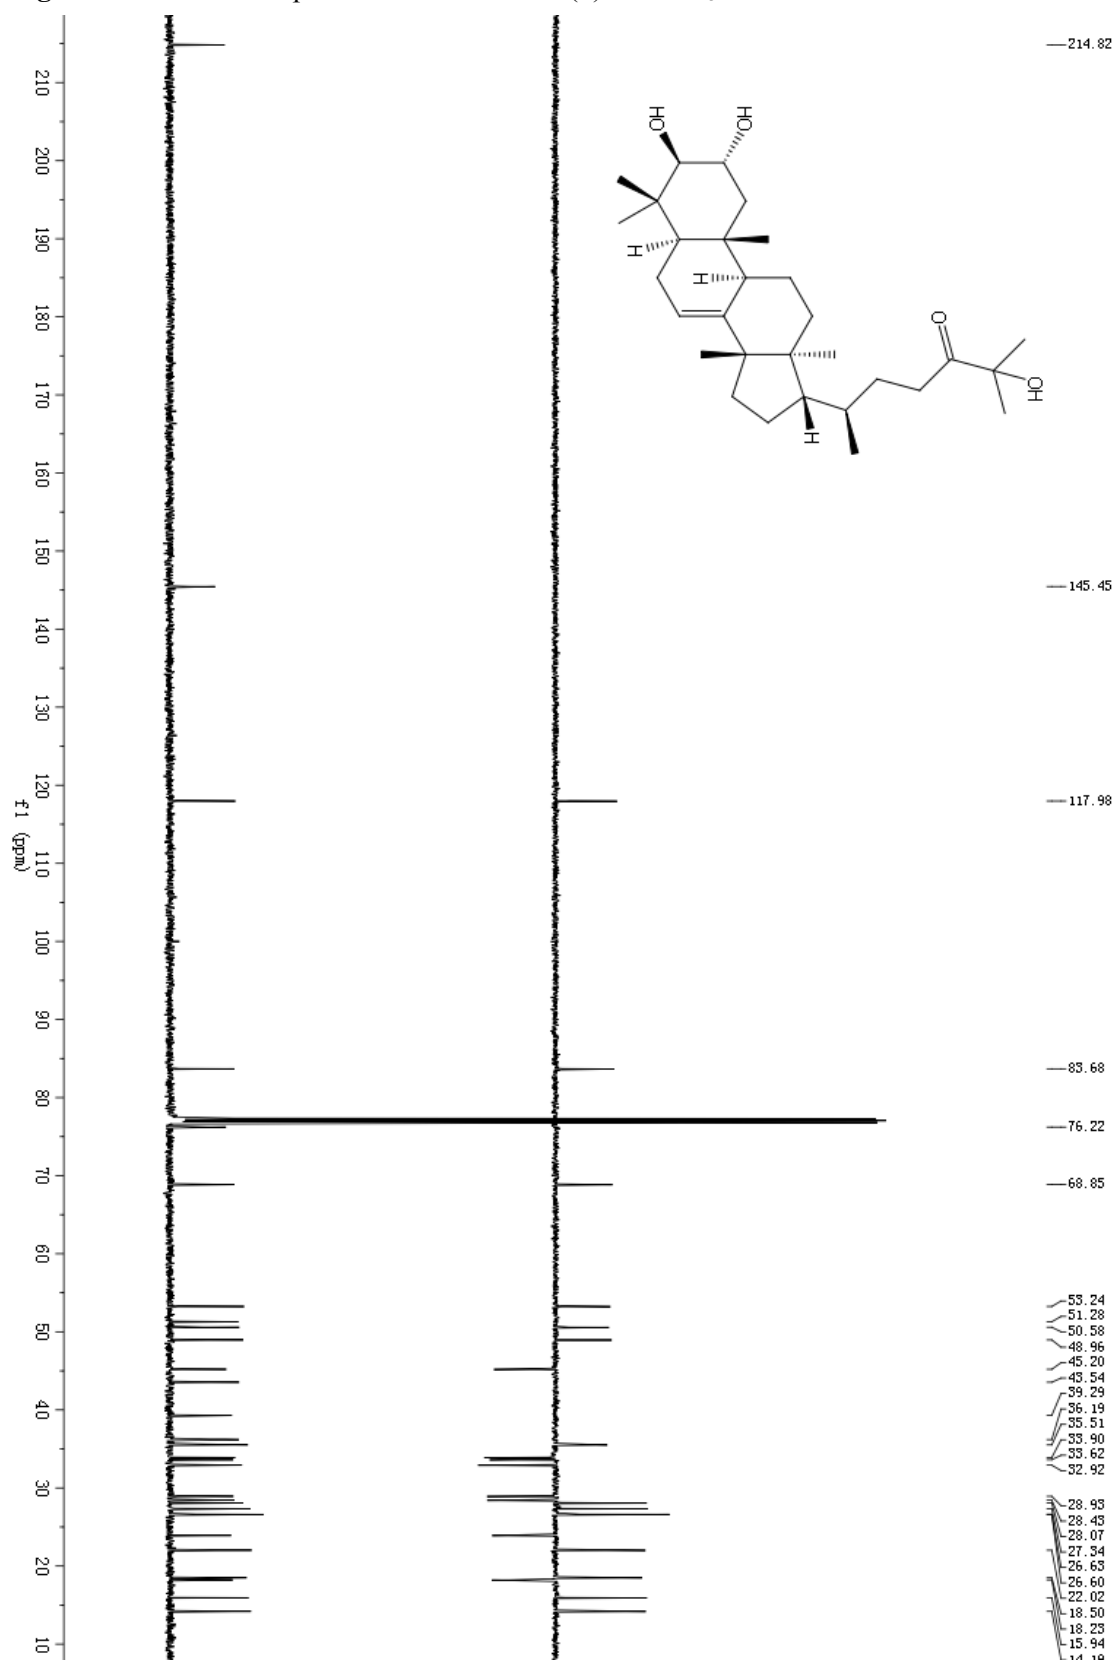

**Figure S24.** HSQC spectrum of ricinodol C (**3**) in CDCl<sub>3</sub>

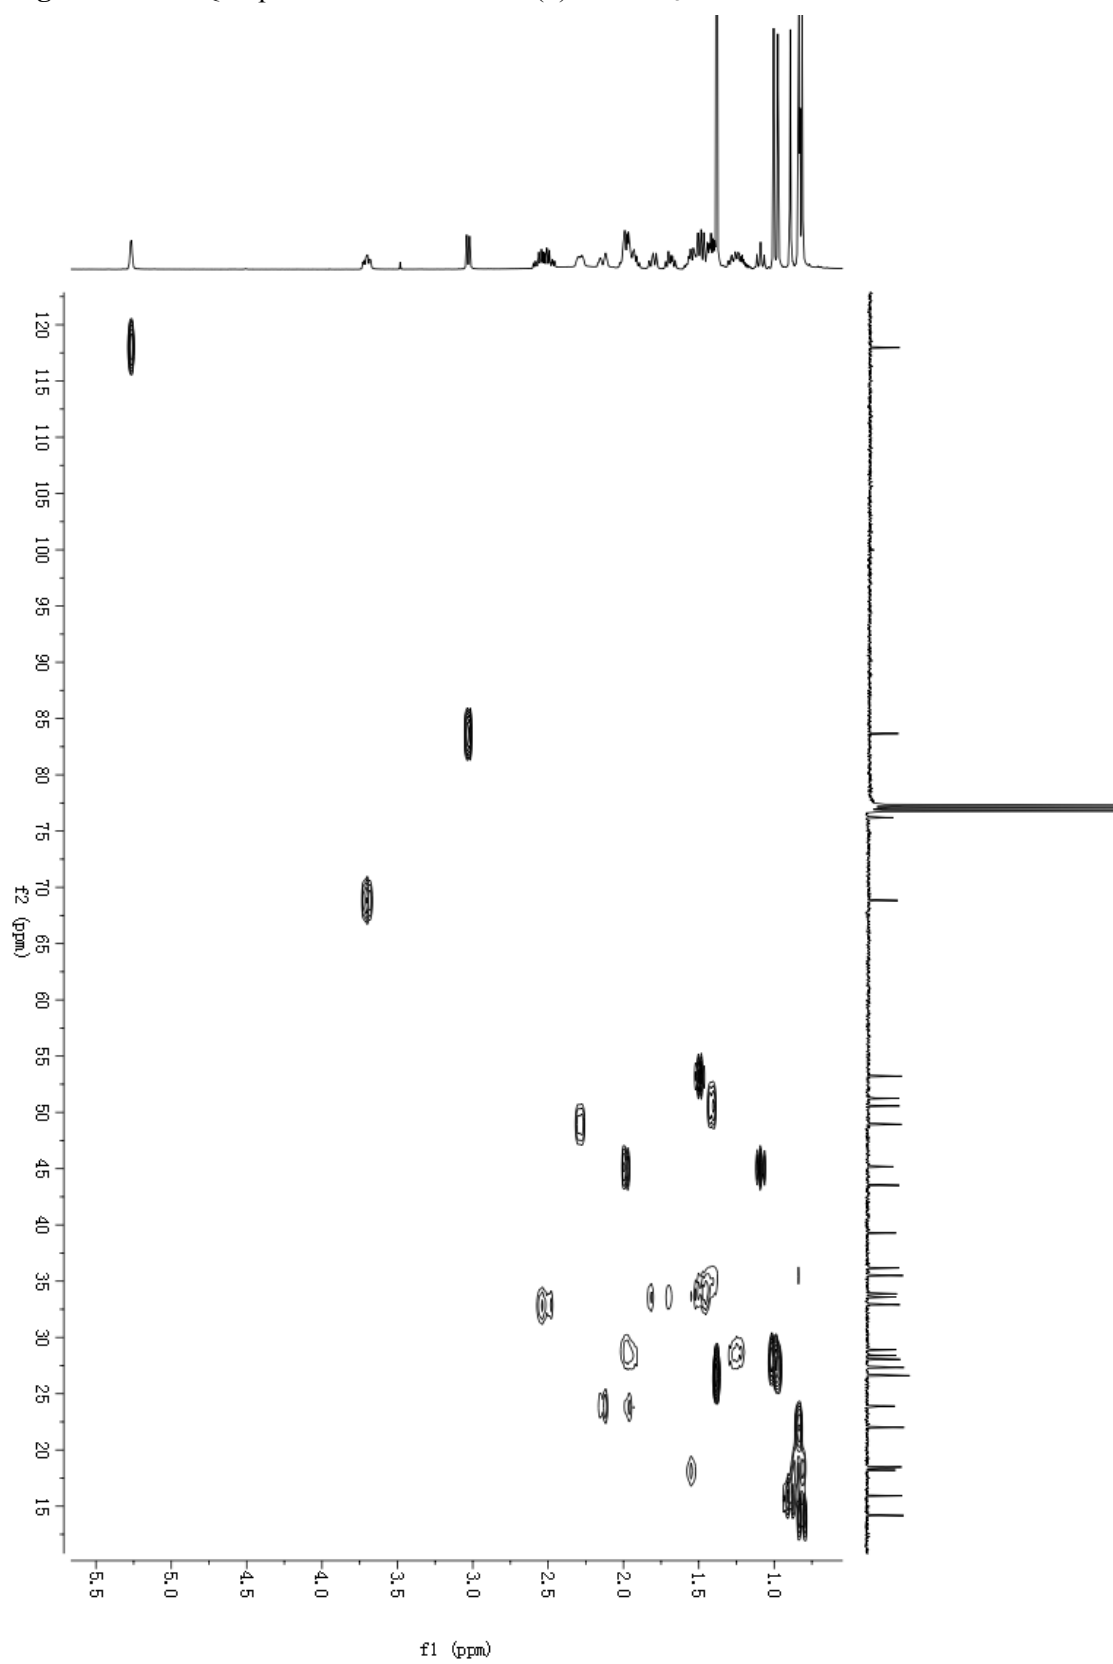



**Figure S26.** HMBC spectrum of ricinodol C (**3**) in CDCl<sub>3</sub>

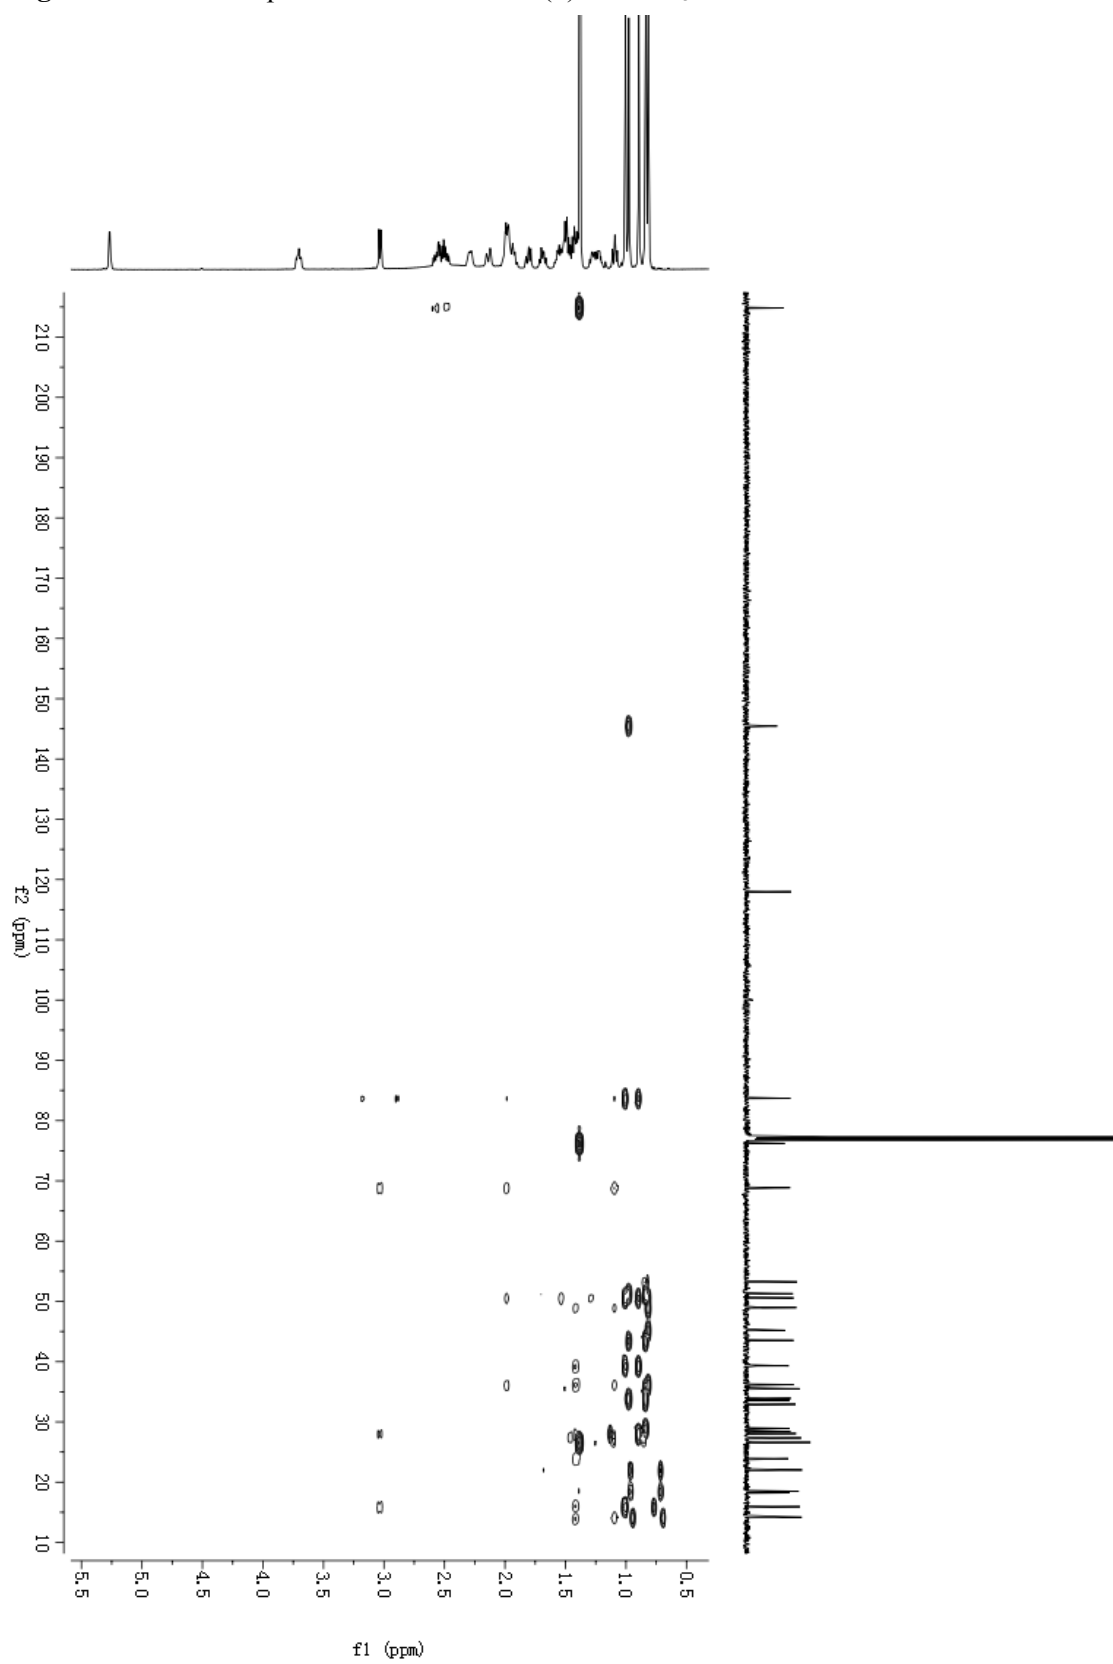

Figure S27. ROESY spectrum of ricinodol C (3) in CDCl<sub>3</sub>

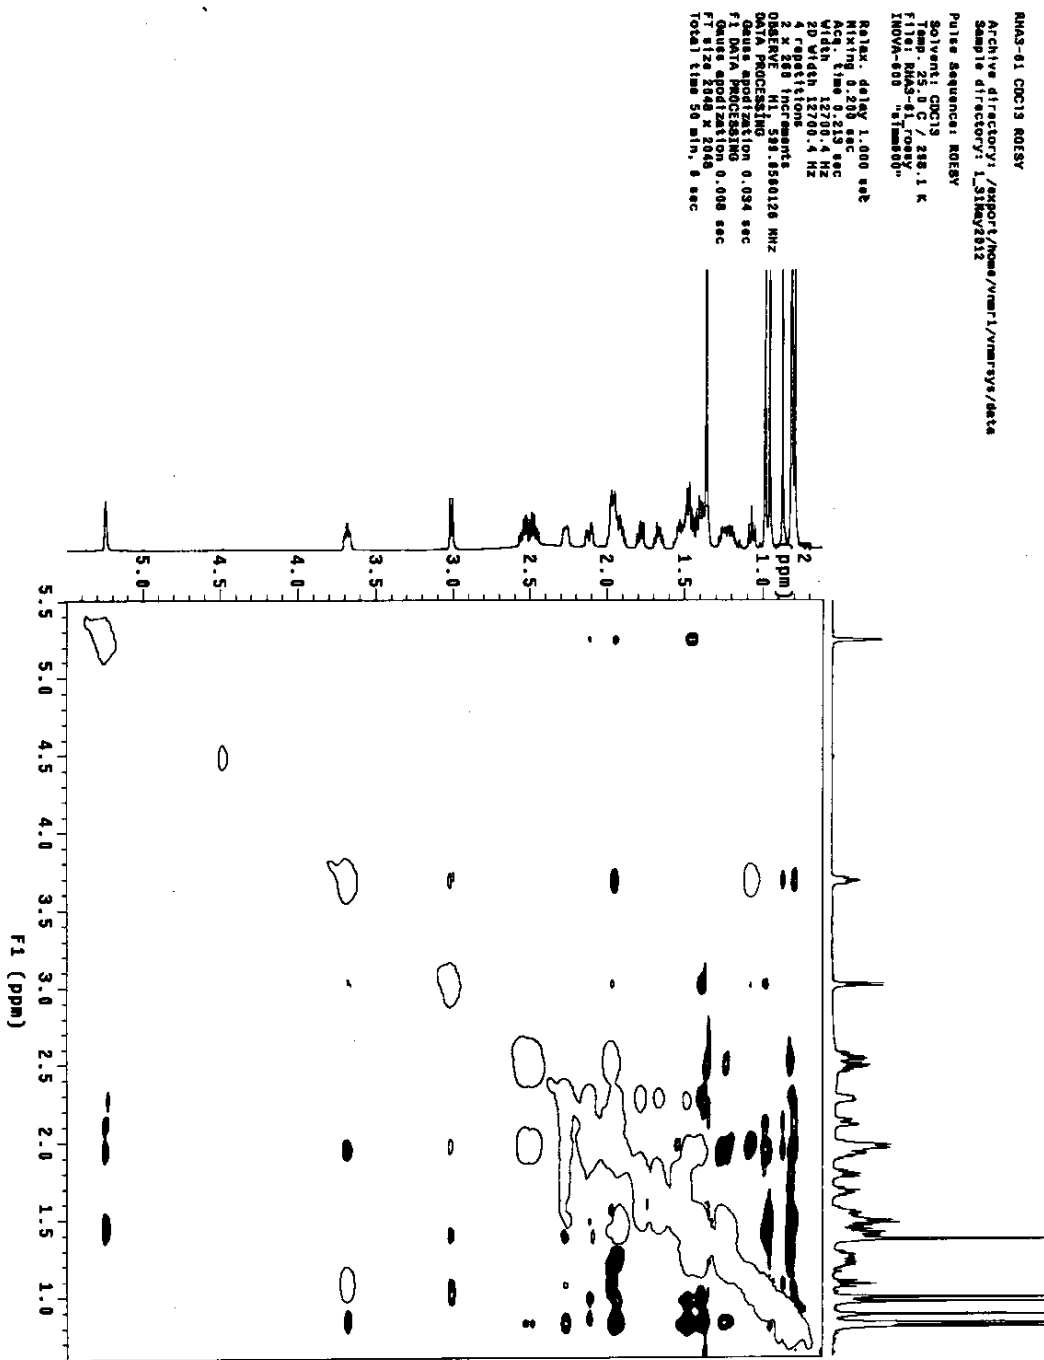



Figure S28. ESI(+)MS spectrum of ricinodol C (3)

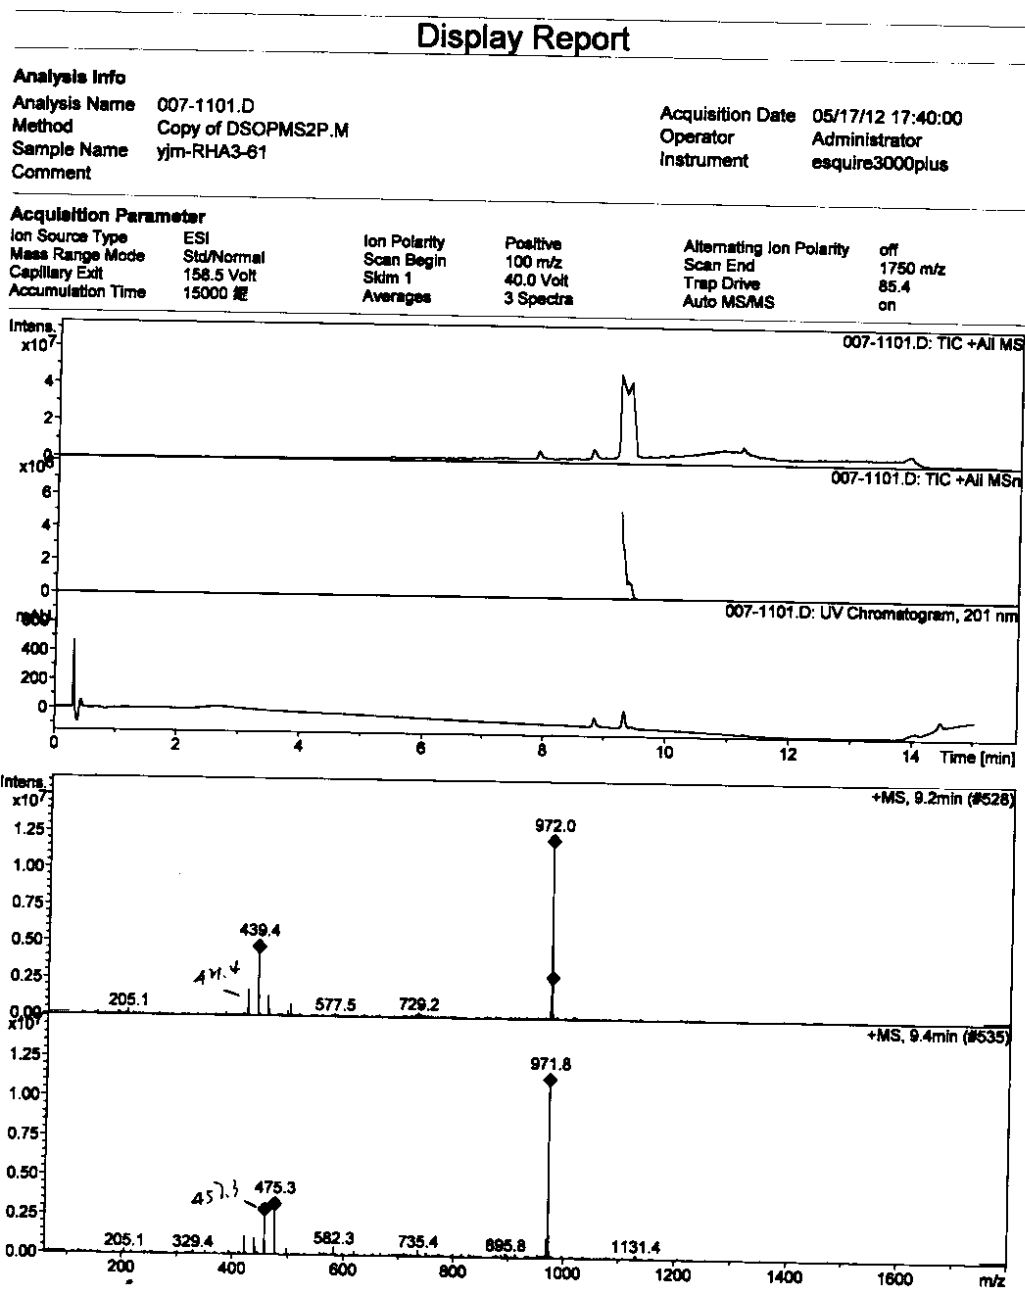

Figure S29. ESI(-)MS spectrum of ricinodol C (3)

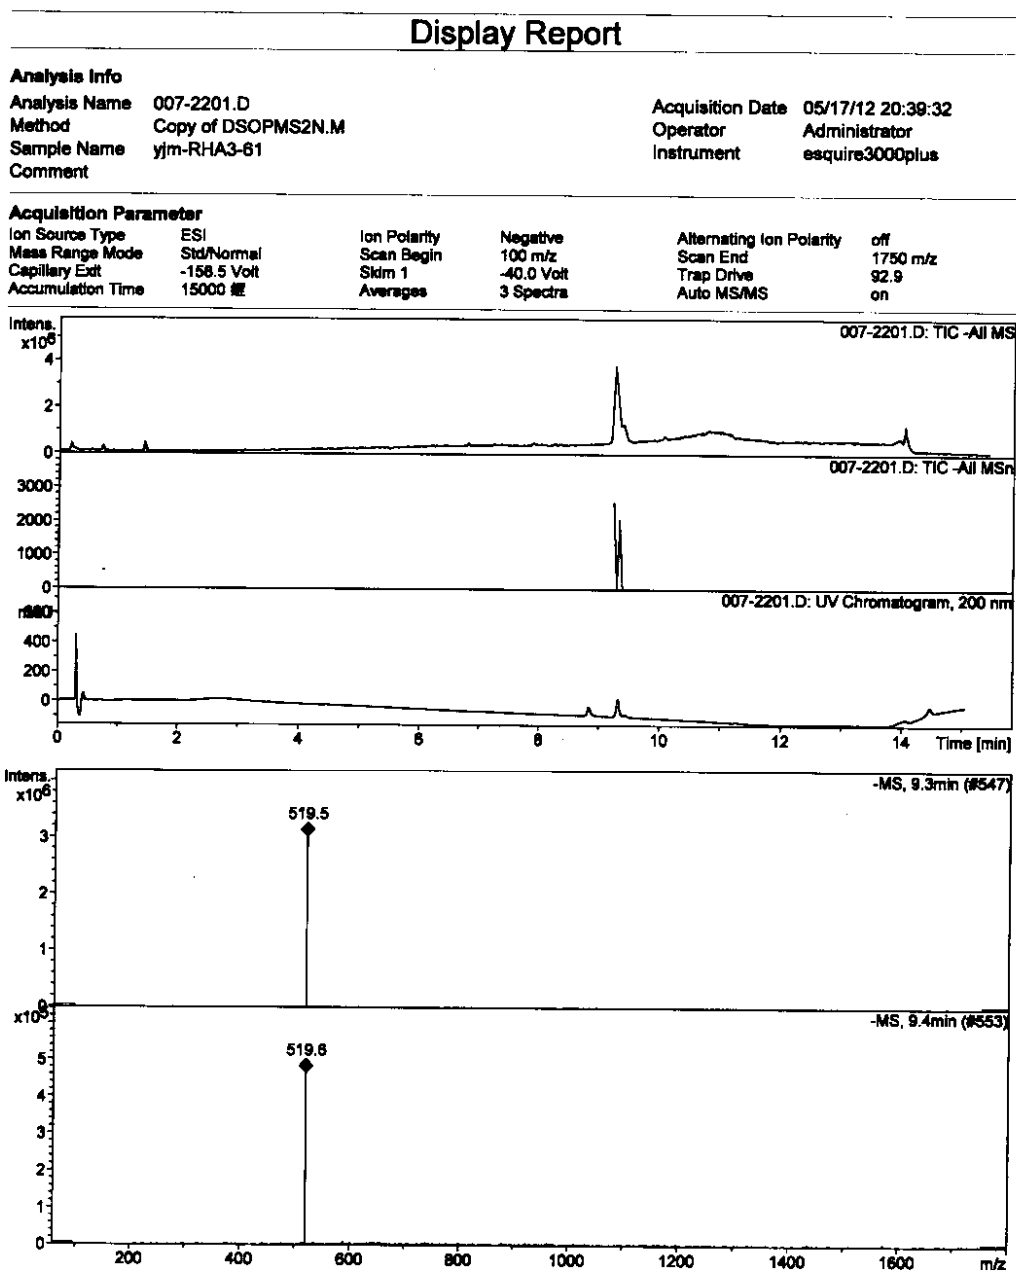

Figure S30. HRESI(-)MS spectrum of ricinodol C (3)

Elemental Composition Report

Single Mass Analysis

Tolerance = 3.0 PPM / DBE: min = -1.5, max = 50.0

Element prediction: Off

Number of isotope peaks used for i-FIT = 3

Monoisotopic Mass, Even Electron Ions

121 formula(e) evaluated with 1 results within limits (up to 50 best isotopic matches for each mass)

Elements Used:

C: 10-60 H: 1-110 O: 0-30

YJH

LCT PXE KE324

18-May-2012

14:18:18

1: TOF MS ES-

8.17e+004

983.7148

RHA3-61 16 (0.351) AM2 (Ar,10000.0,0.00,1.00); ABS; Cm (5:30)

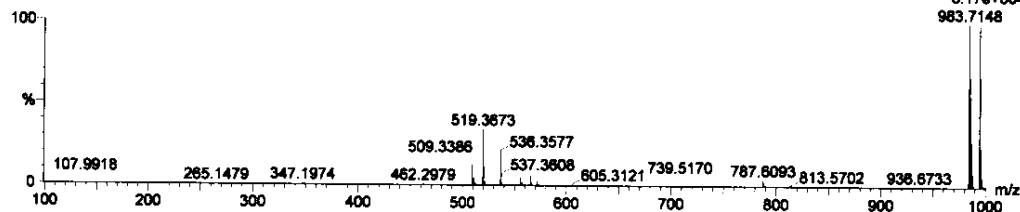

Minimum:

Maximum: 3.0 3.0 -1.5

Maximum: 3.0 3.0 50.0

| Mass     | Calc. Mass | mDa  | PPM  | DBE | i-FIT | i-FIT (Norm) | Formula    |
|----------|------------|------|------|-----|-------|--------------|------------|
| 519.3673 | 519.3686   | -1.3 | -2.5 | 6.5 | 123.9 | 0.0          | C31 H51 O6 |

Figure S31. IR spectrum of ricinodol C (3)

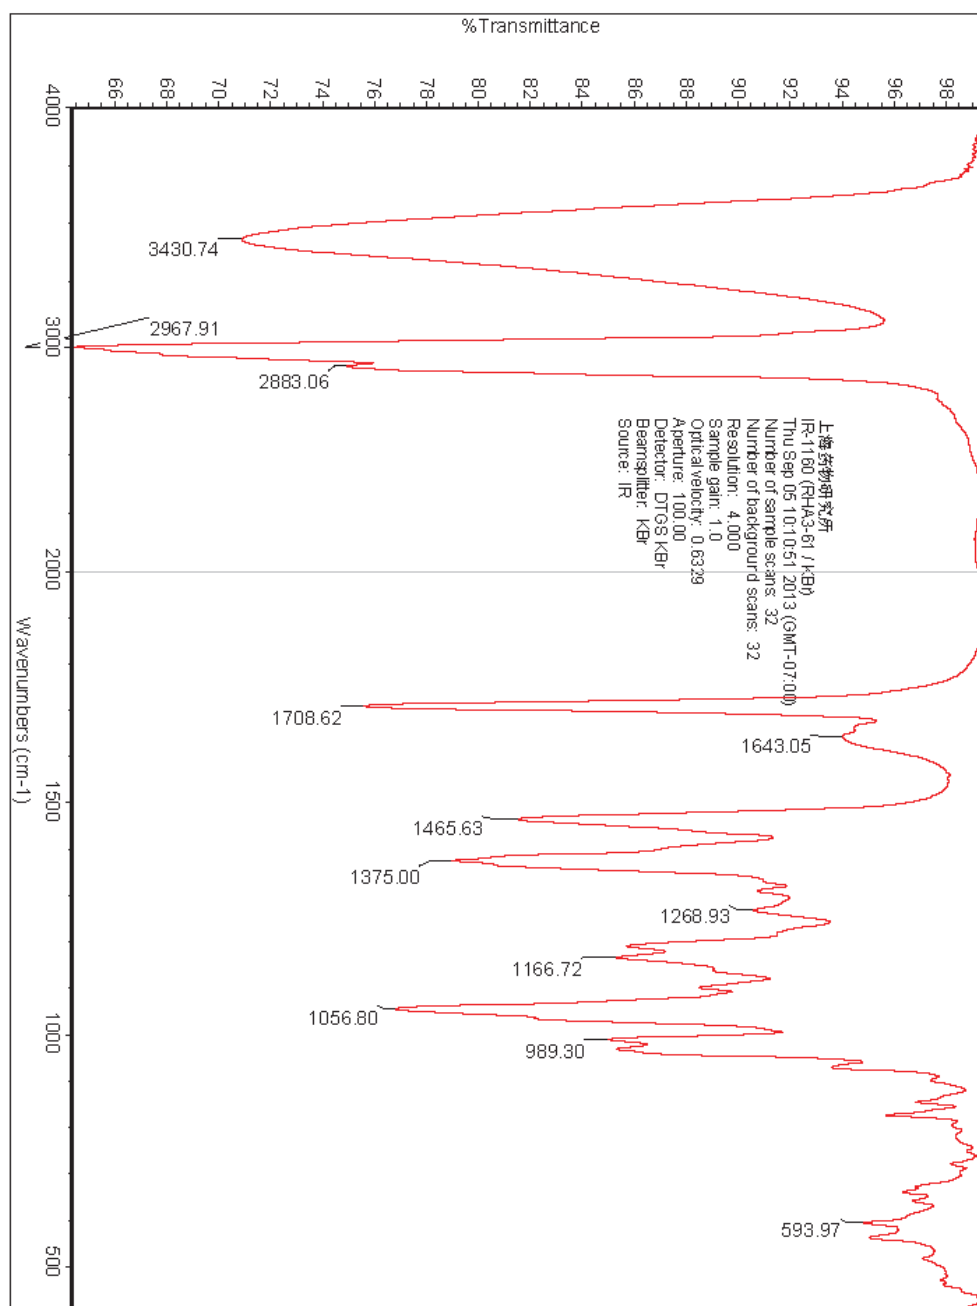

**Figure S32.**  $^1\text{H}$  NMR spectrum of ricinodol D (**4**) in  $\text{CDCl}_3$

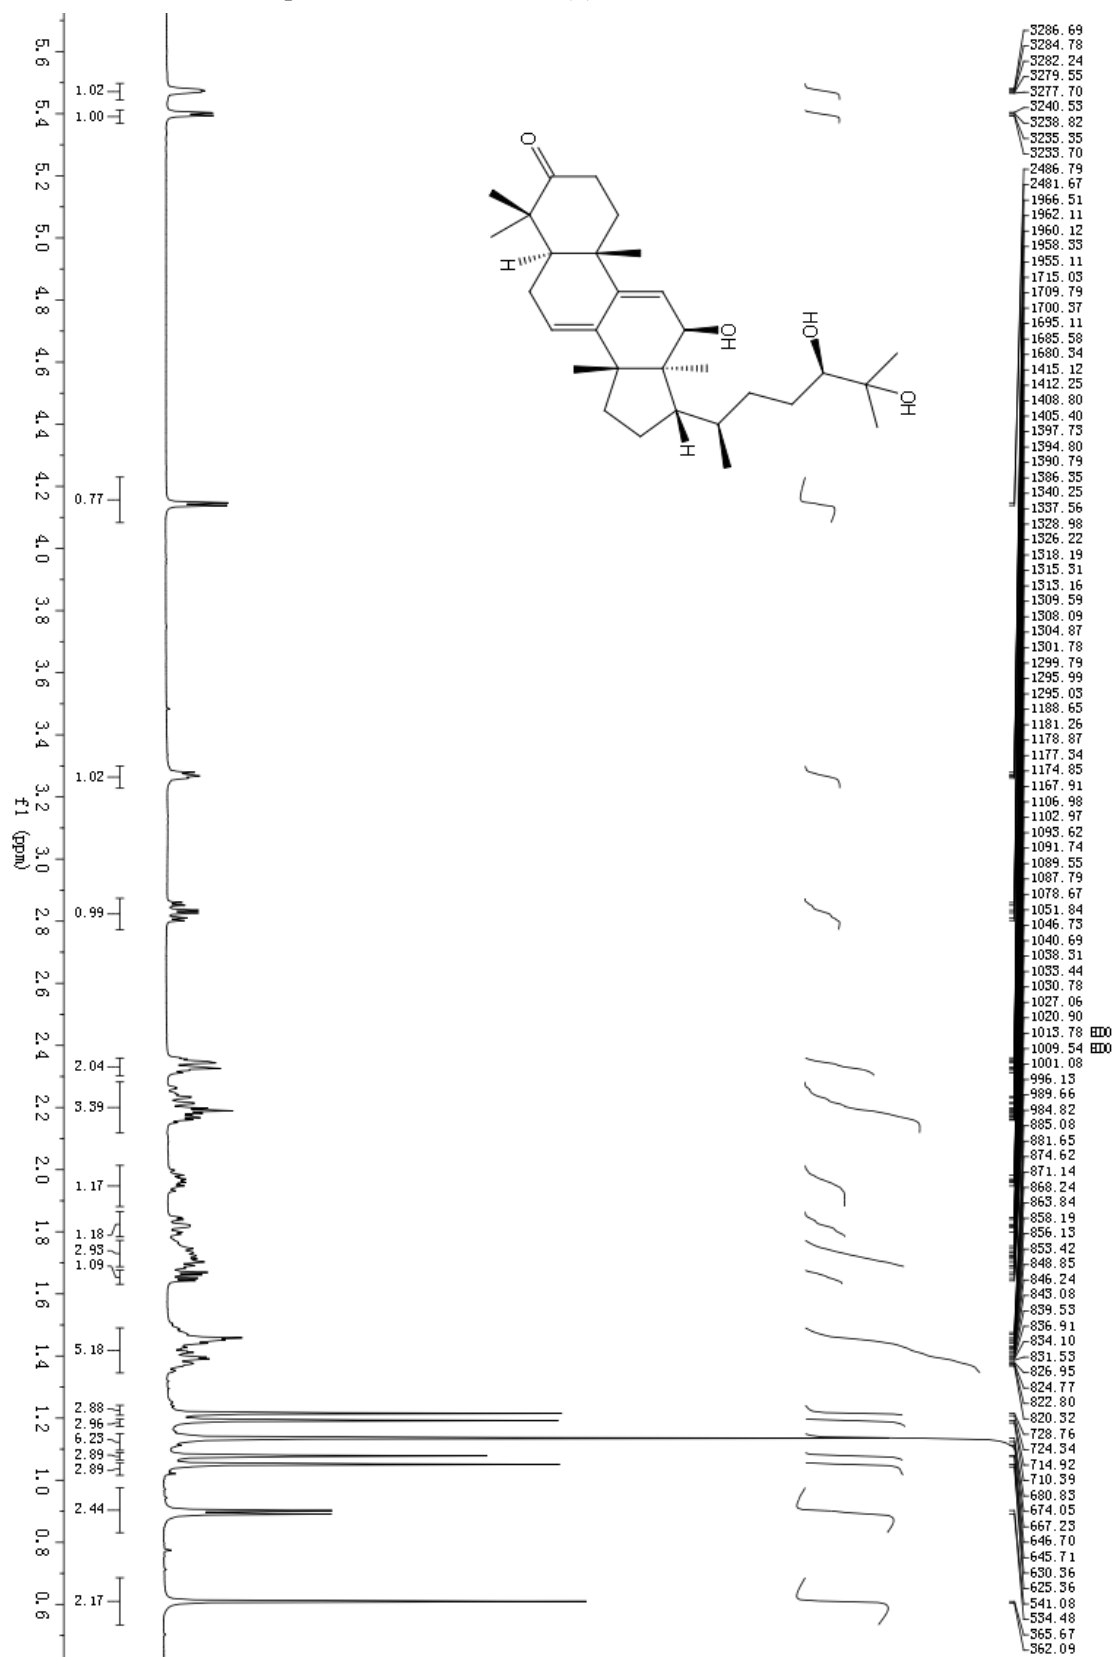

**Figure S33.**  $^{13}\text{C}$  NMR spectrum of ricinodol D (**4**) in  $\text{CDCl}_3$

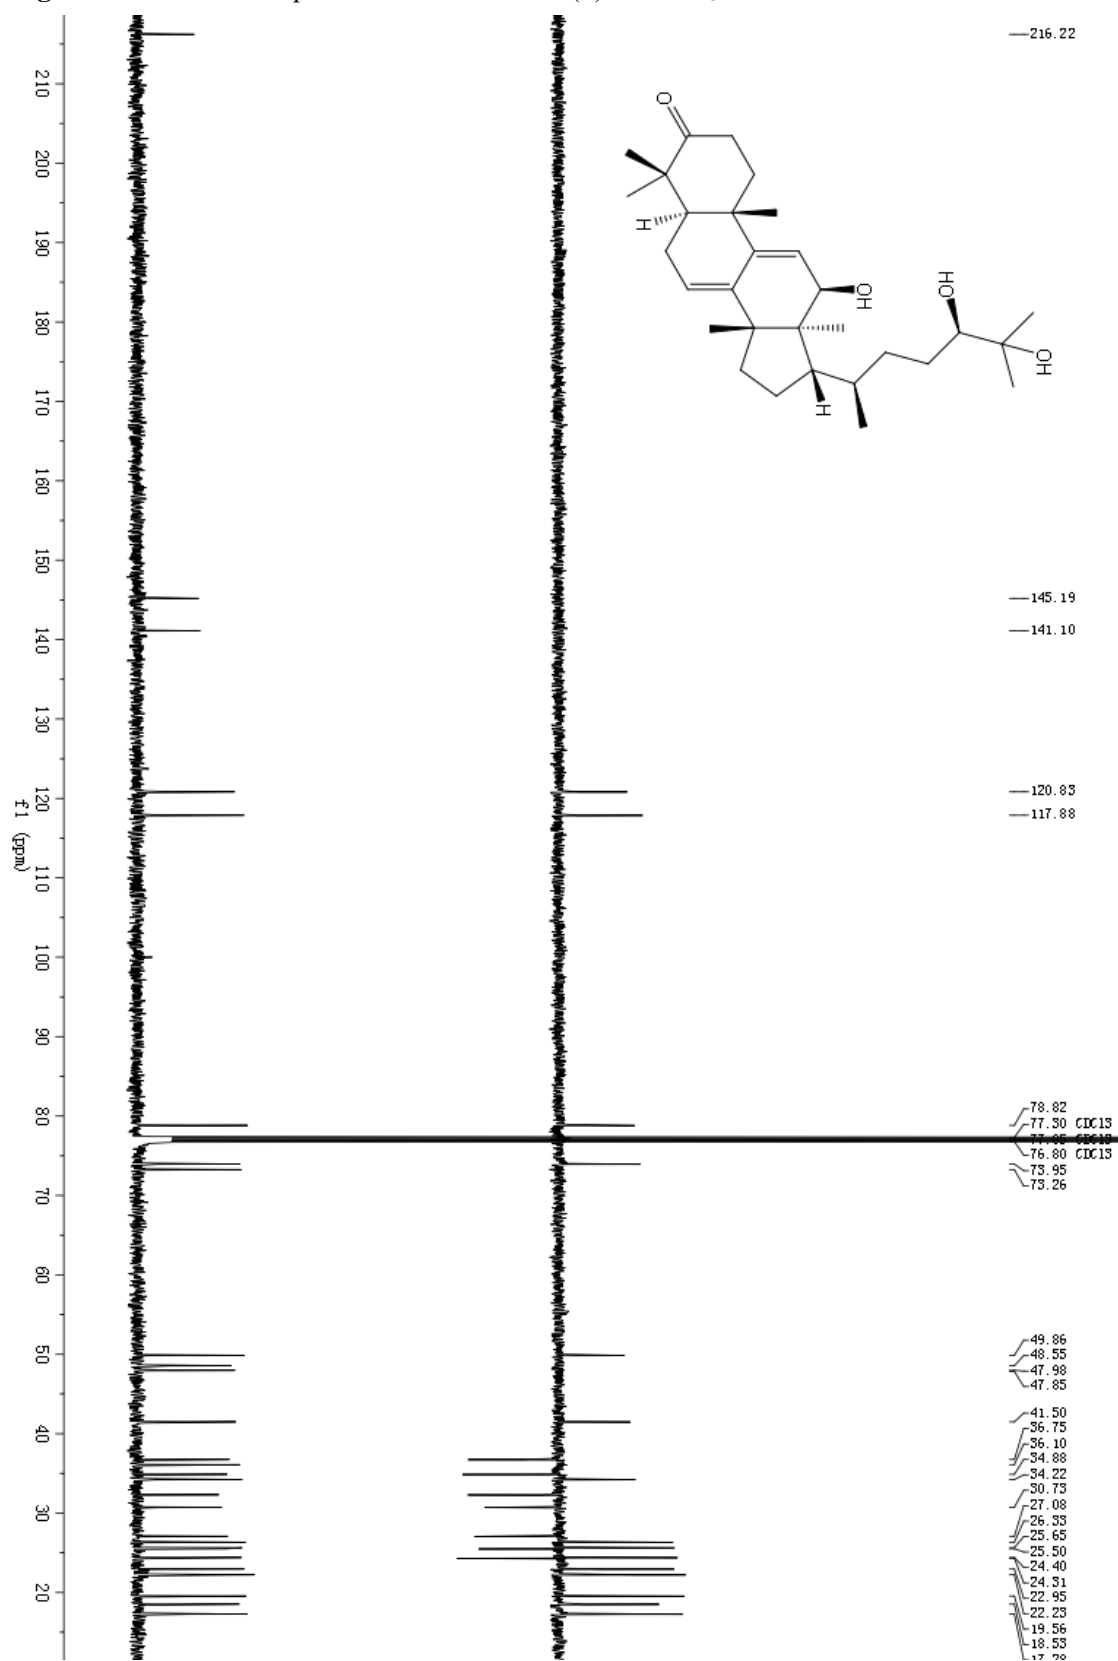

**Figure S34.** HSQC spectrum of ricinodol D (**4**) in CDCl<sub>3</sub>

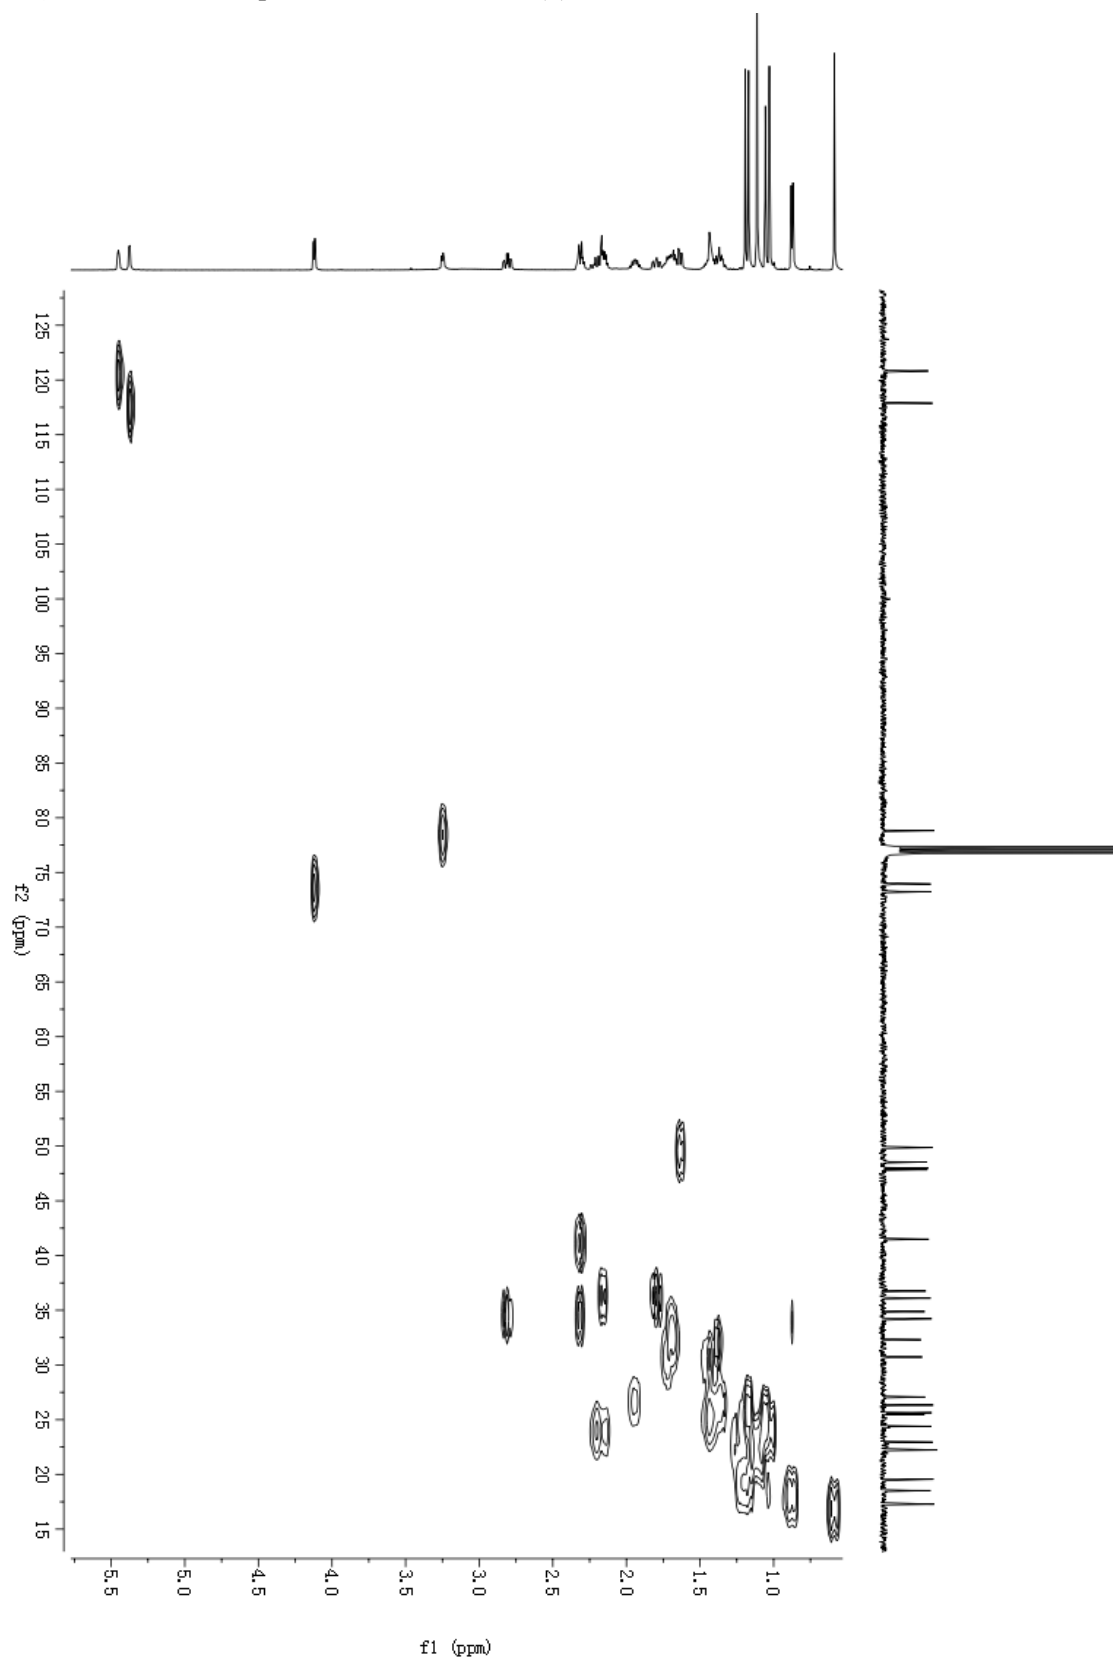

**Figure S35.** HMBC spectrum of ricinodol D (**4**) in CDCl<sub>3</sub>

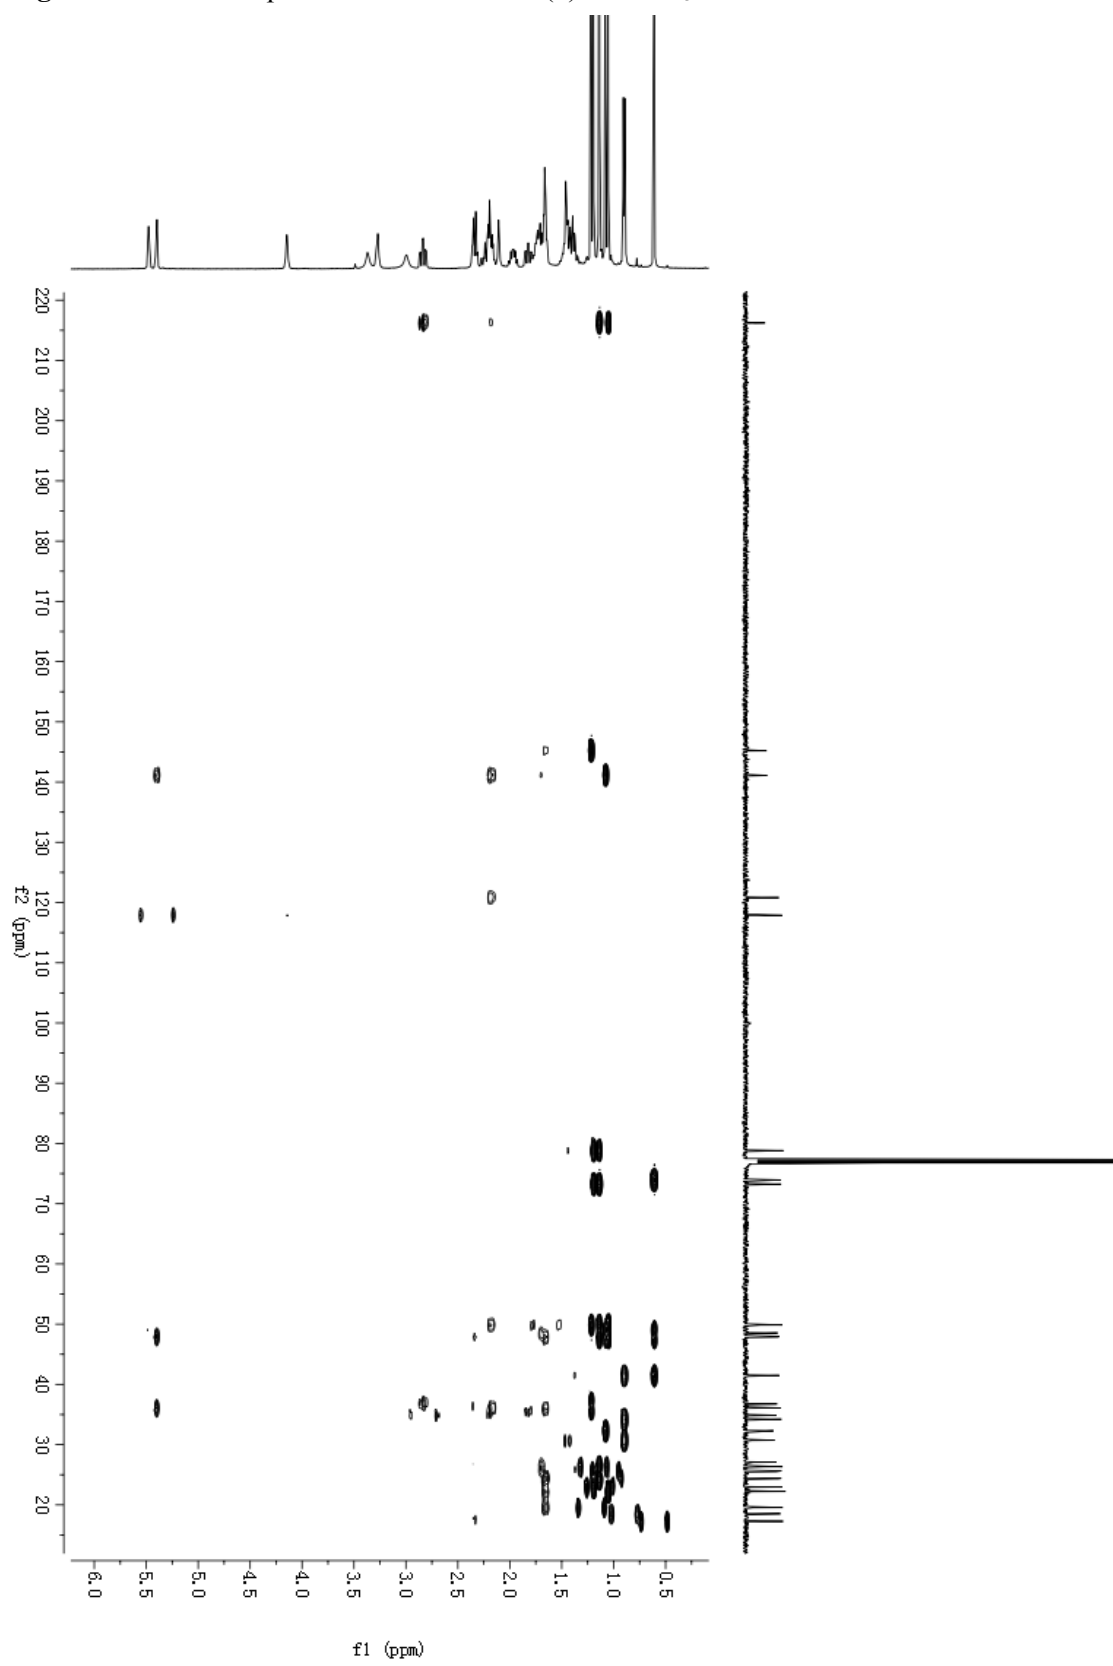



Figure S36. ROESY spectrum of ricinodol C (4) in CDCl<sub>3</sub>

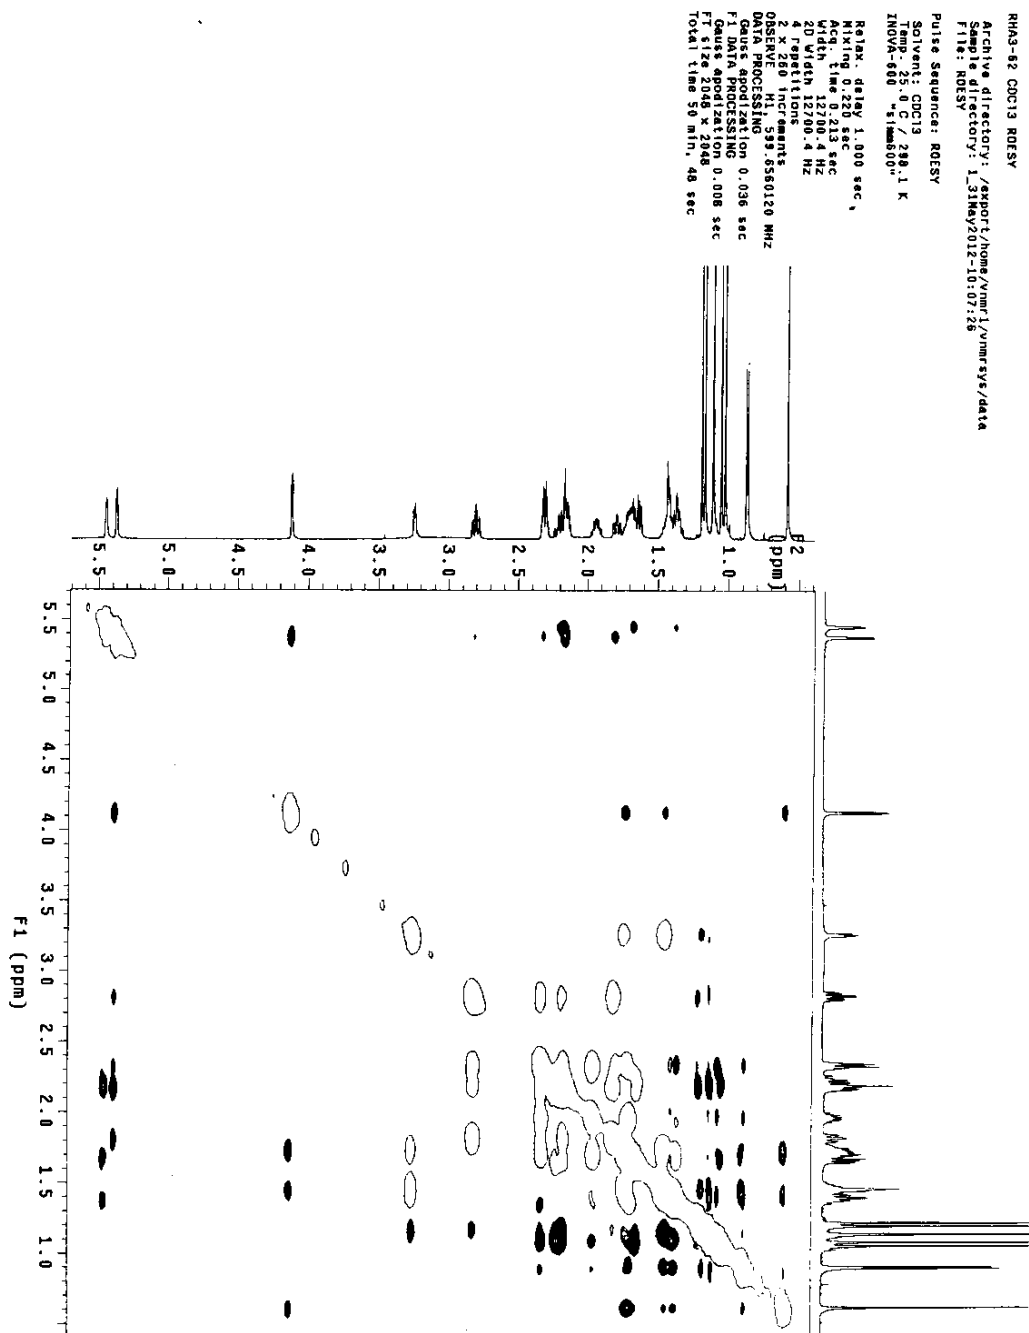

Figure S37. ESI(+)MS spectrum of ricinodol D (4)

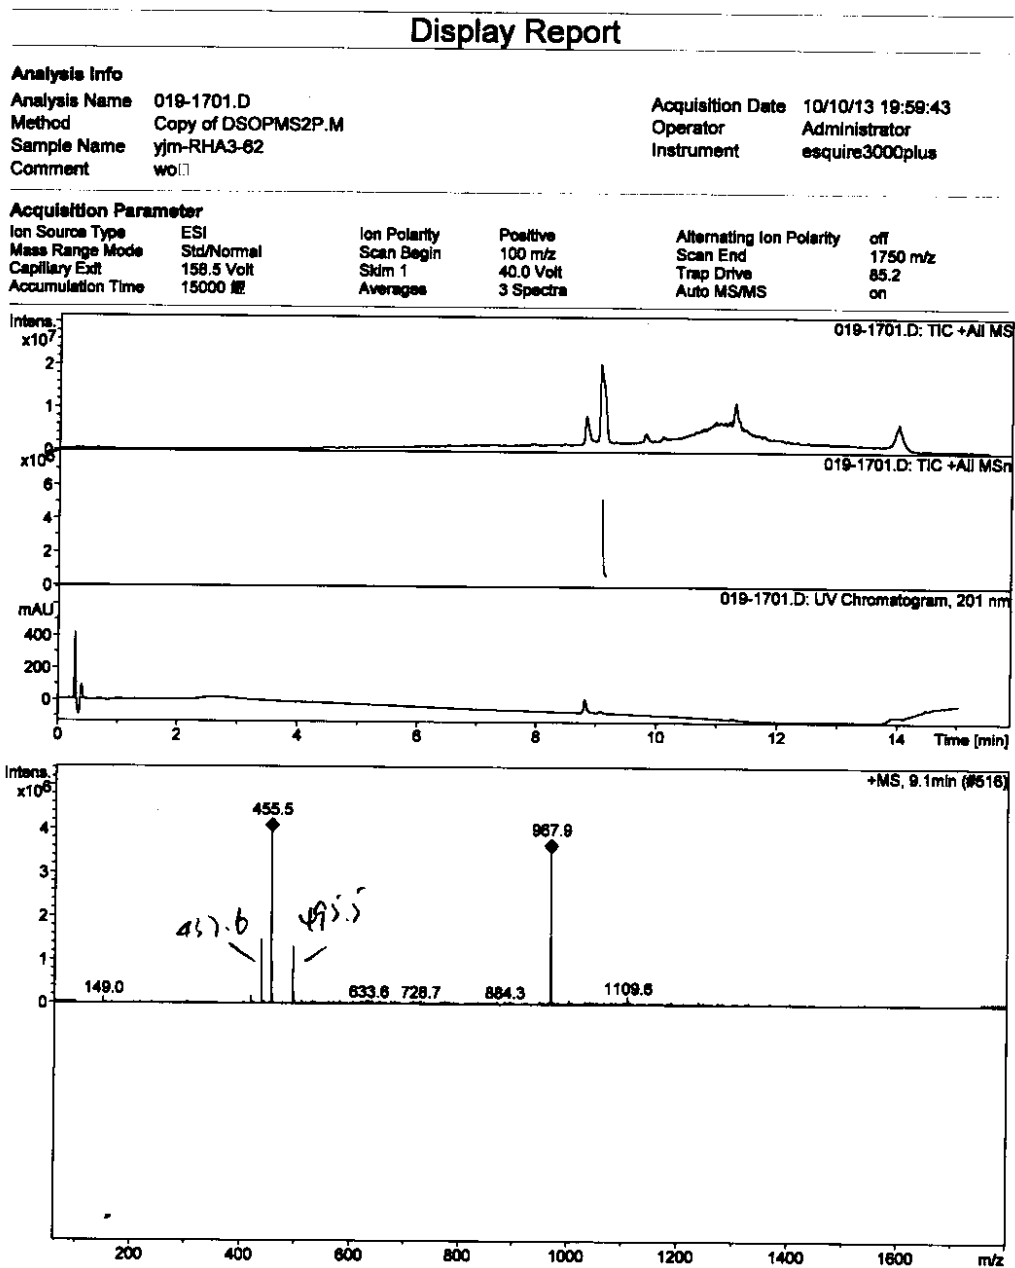

Figure S38. ESI(-)MS spectrum of ricinodol D (4)

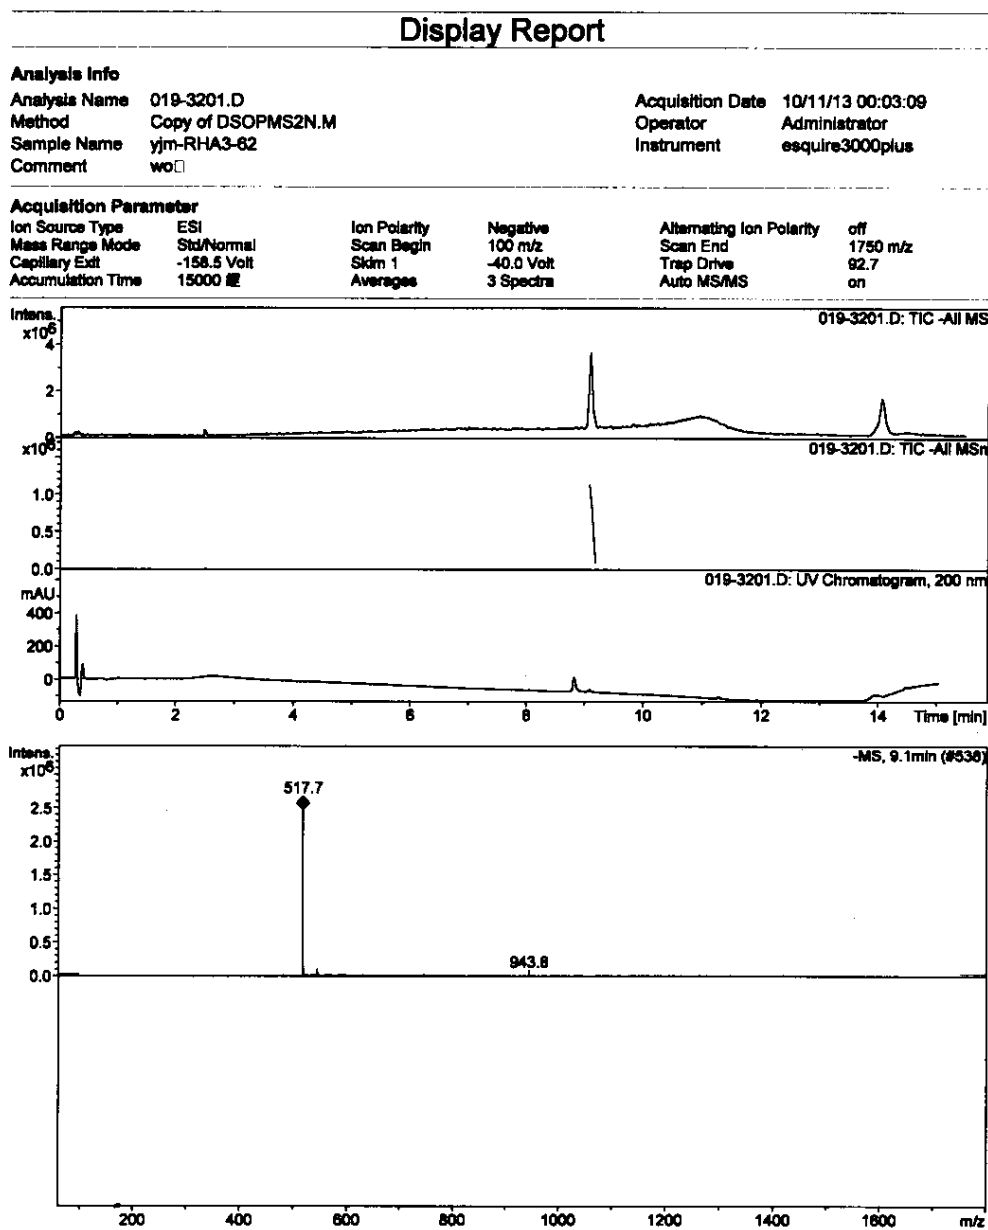

Figure S39. HRESI(+)MS spectrum of ricinodol D (4)

Elemental Composition Report

Single Mass Analysis

Tolerance = 4.0 PPM / DBE: min = -1.5, max = 50.0  
 Element prediction: Off  
 Number of isotope peaks used for i-FIT = 3

Monoisotopic Mass, Even Electron Ions

191 formula(e) evaluated with 1 results within limits (up to 50 closest results for each mass)

Elements Used:

C: 5-80 H: 2-120 O: 0-20 Na: 0-1

RHA3-62

LCT PXE KE324

03-Sep-2013

15:58:34

1: TOF MS ES+

1.97e+004

987.7023

RHA3-62\_0903 27 (0.582) AM2 (Ar,10000.0,0.00,1.00); ABS; Cm (26;38)

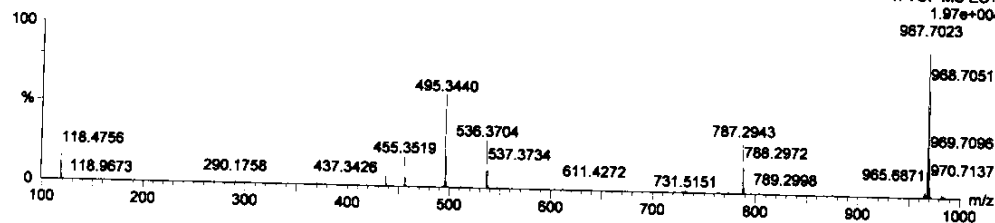

Minimum:

Maximum:

3.0 4.0 -1.5

50.0

| Mass | Calc. Mass | mDa | PPM | DBE | i-FIT | i-FIT (Norm) | Formula |
|------|------------|-----|-----|-----|-------|--------------|---------|
|------|------------|-----|-----|-----|-------|--------------|---------|

|          |          |      |      |     |      |     |               |
|----------|----------|------|------|-----|------|-----|---------------|
| 495.3440 | 495.3450 | -1.0 | -2.0 | 6.5 | 60.8 | 0.0 | C30 H48 O4 Na |
|----------|----------|------|------|-----|------|-----|---------------|

Figure S40. IR spectrum of ricinodol D (4)

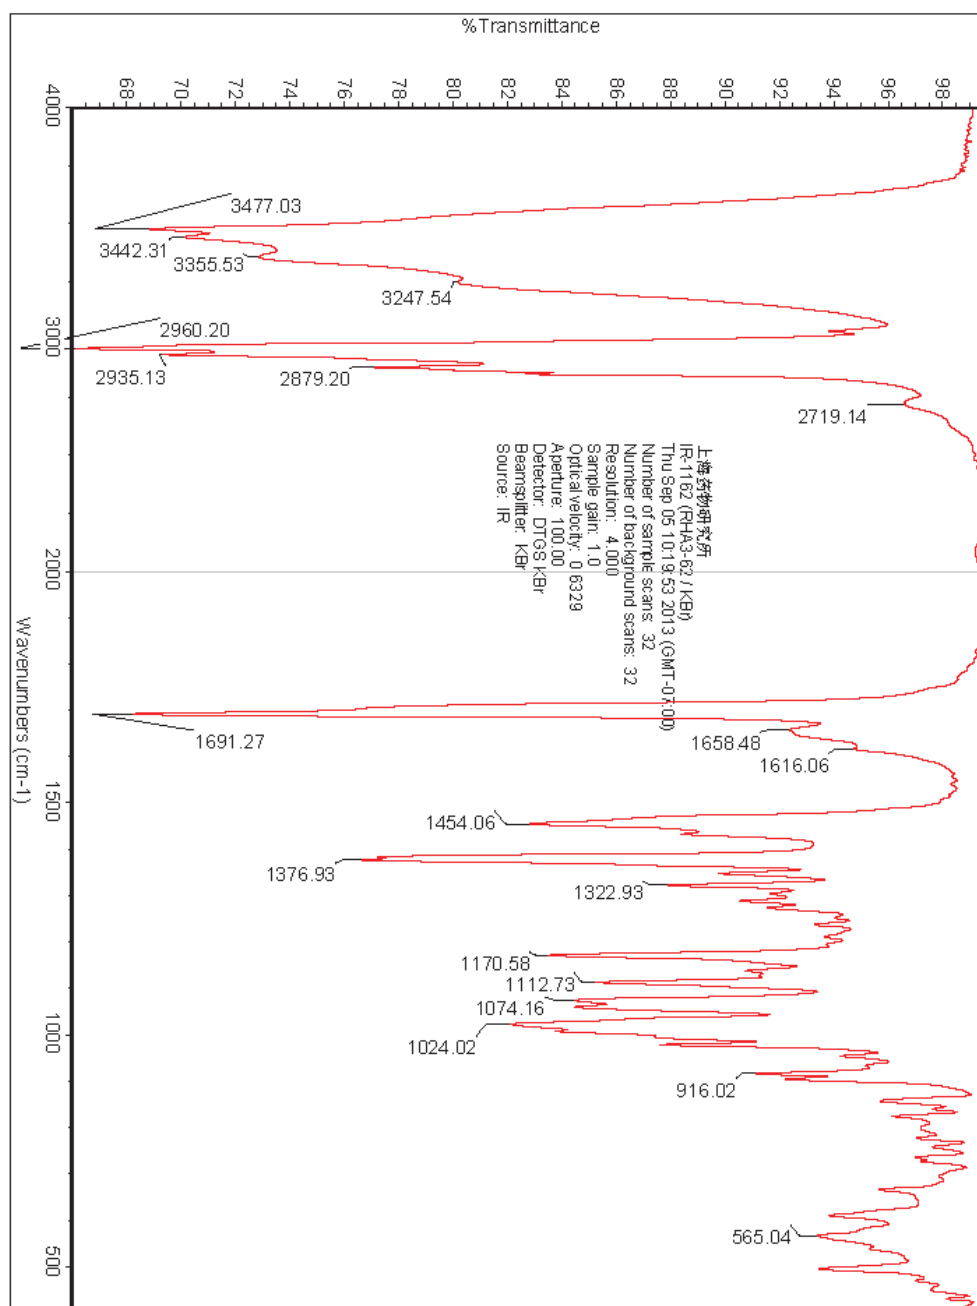

**Figure S41.**  $^1\text{H}$  NMR spectrum of ricinodol E (**5**) in  $\text{CDCl}_3$

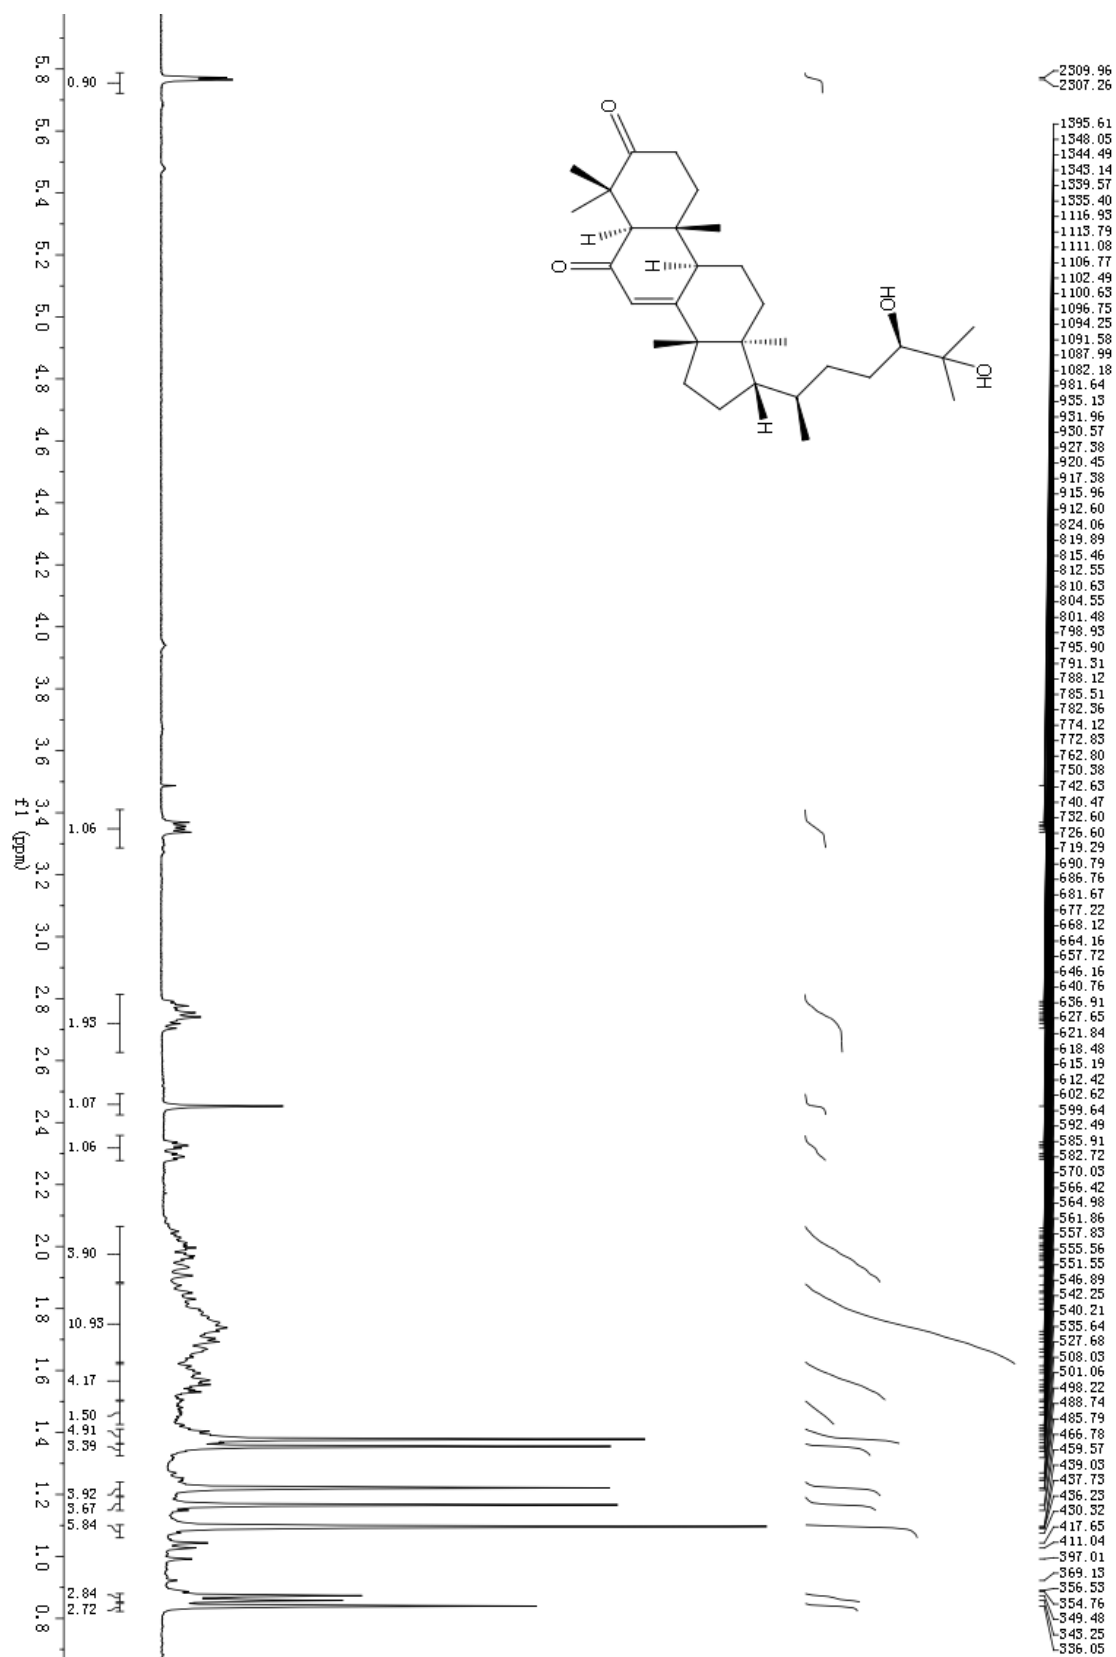

Figure S42.  $^{13}\text{C}$  NMR spectrum of ricinodol E (5) in  $\text{CDCl}_3$

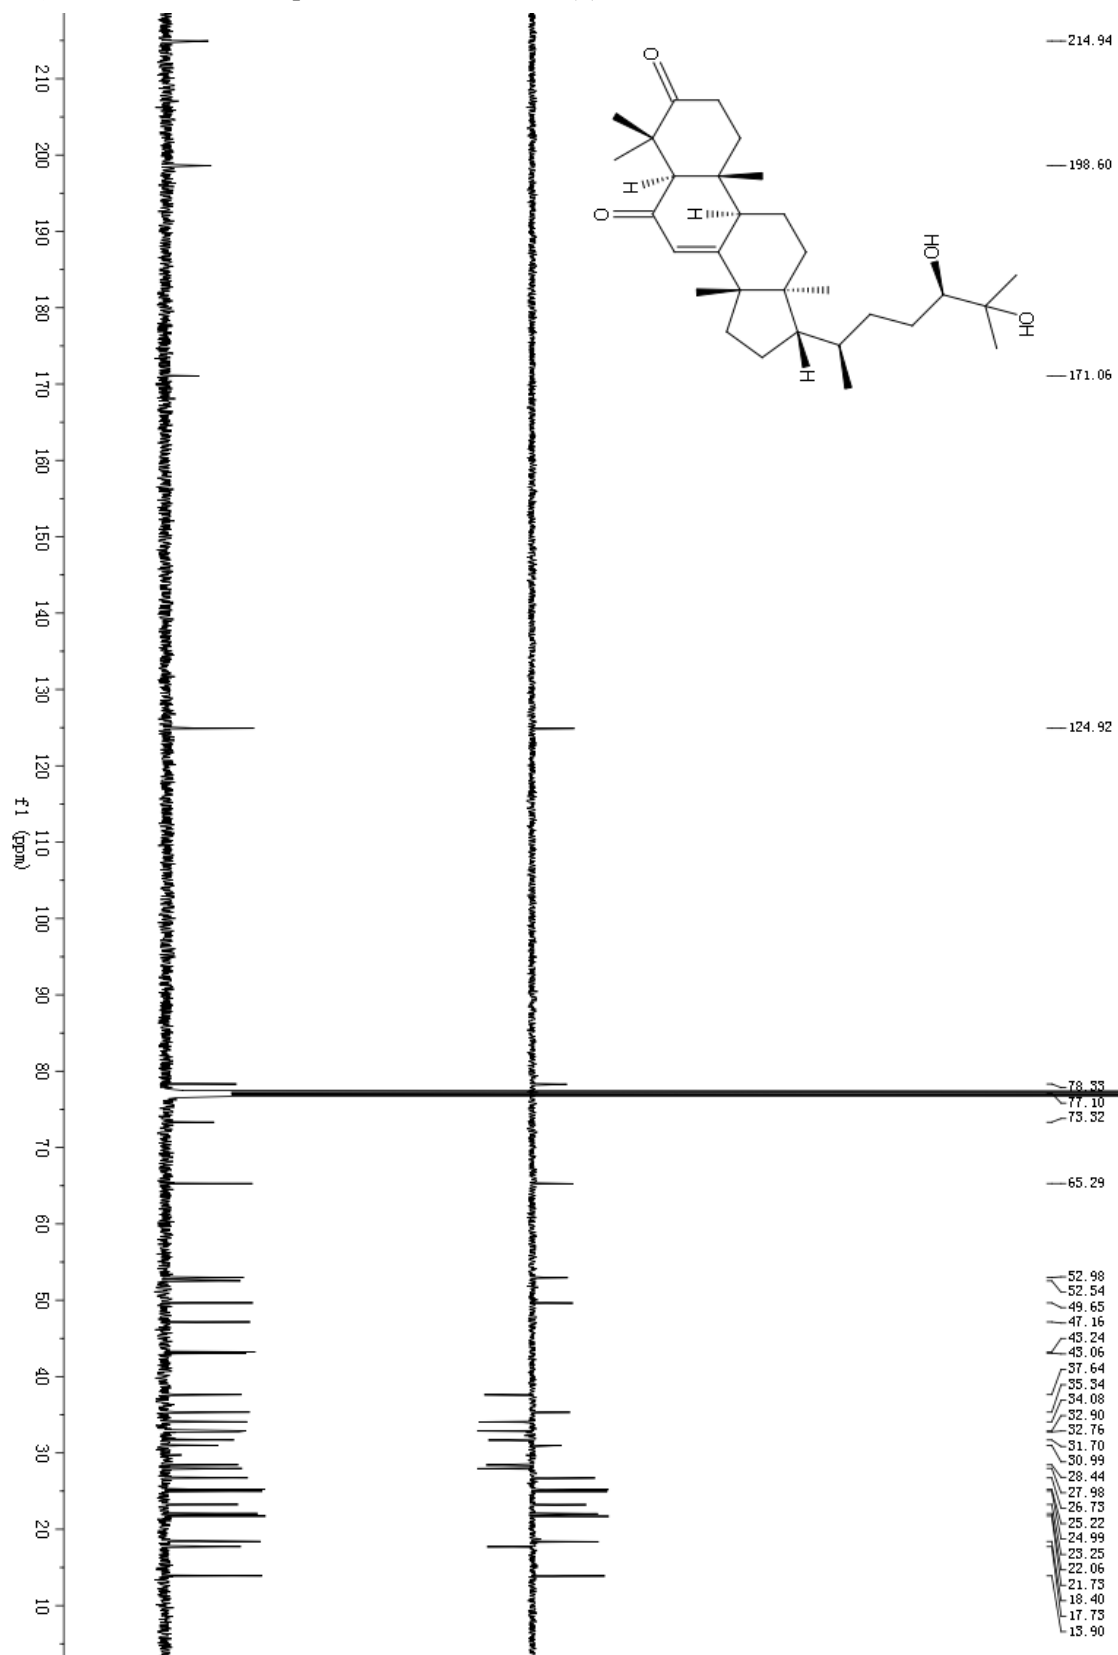

**Figure S43.** HSQC spectrum of ricinodol E (**5**) in CDCl<sub>3</sub>

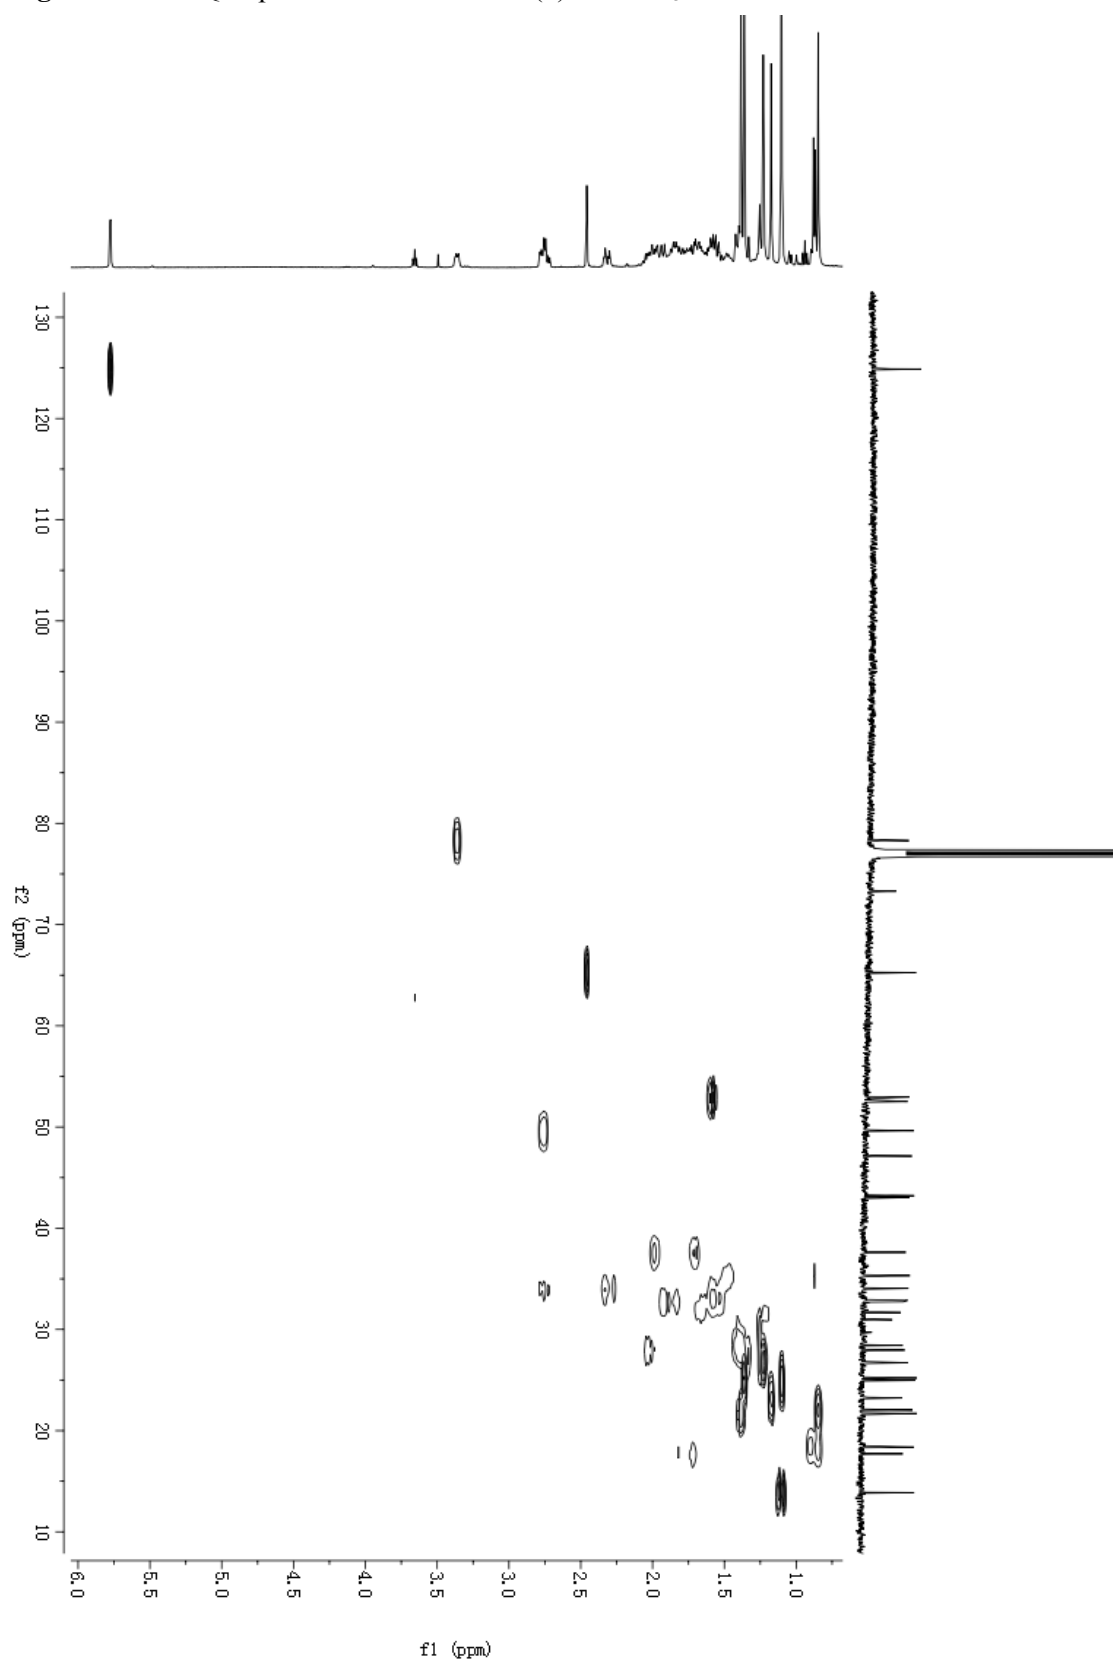



**Figure S44.** HMBC spectrum of ricinodol E (**5**) in CDCl<sub>3</sub>

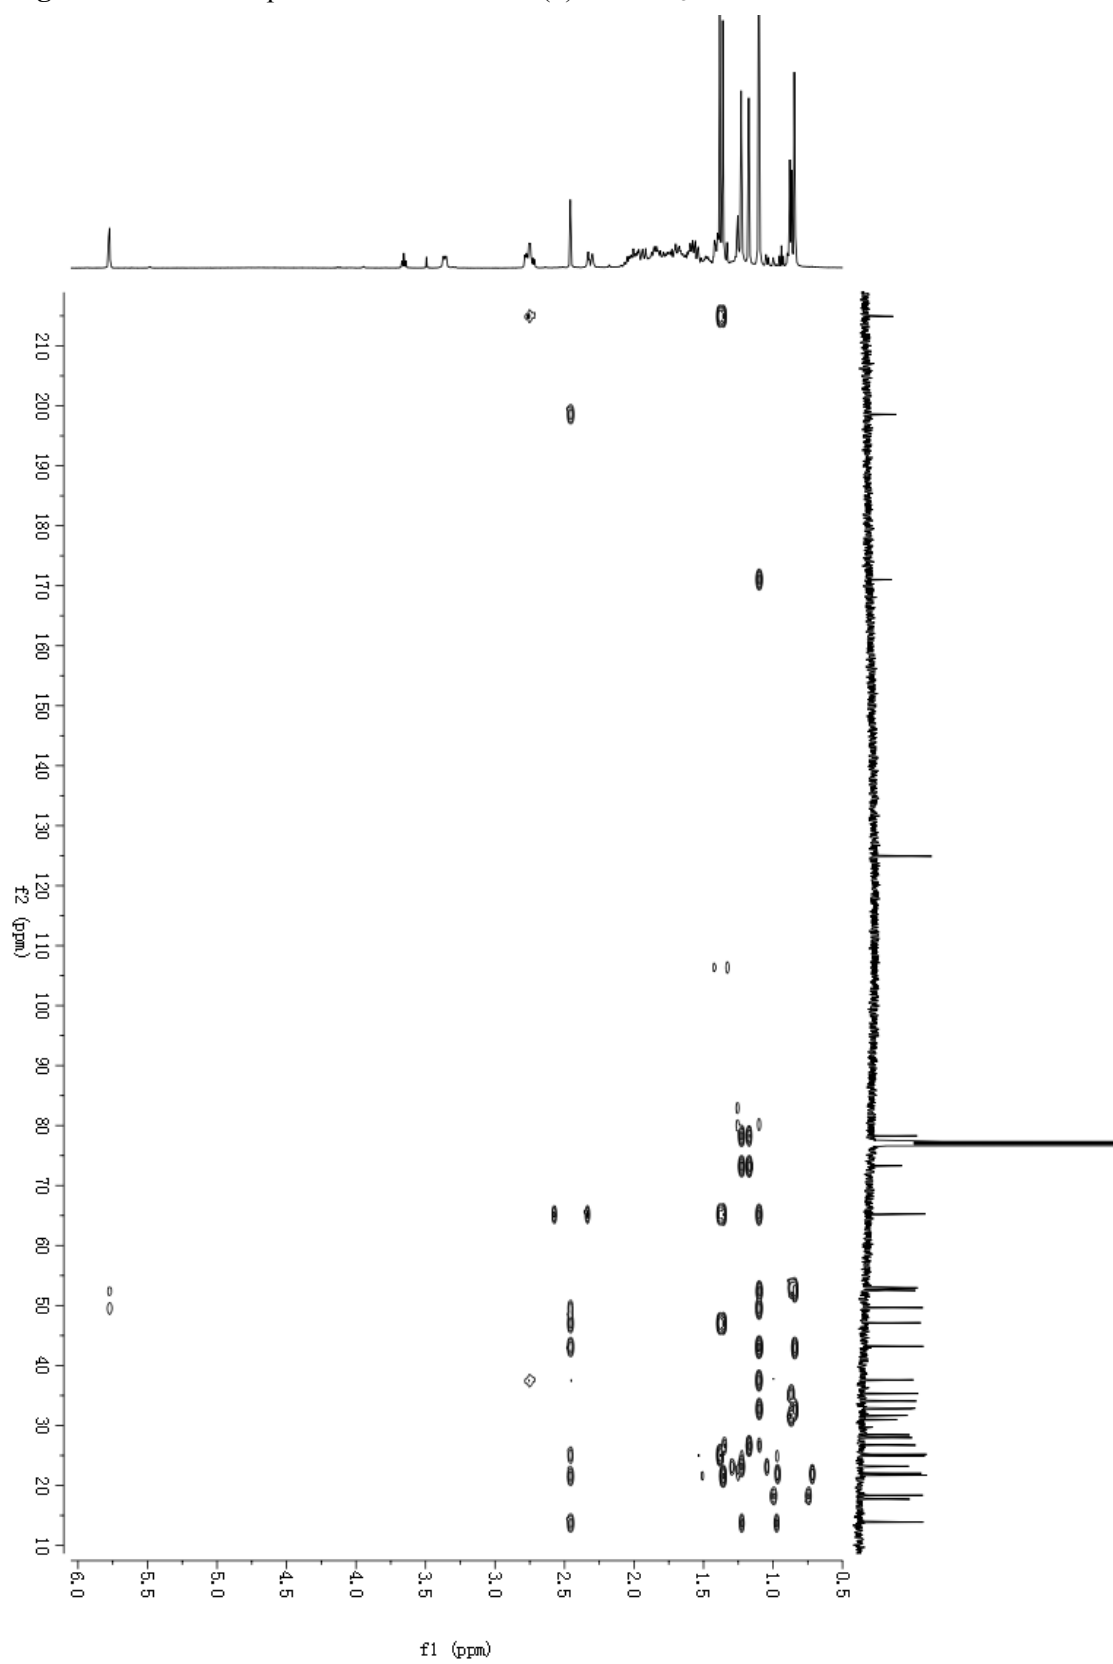

Figure S45. ROESY spectrum of ricinodol E (5) in CDCl<sub>3</sub>

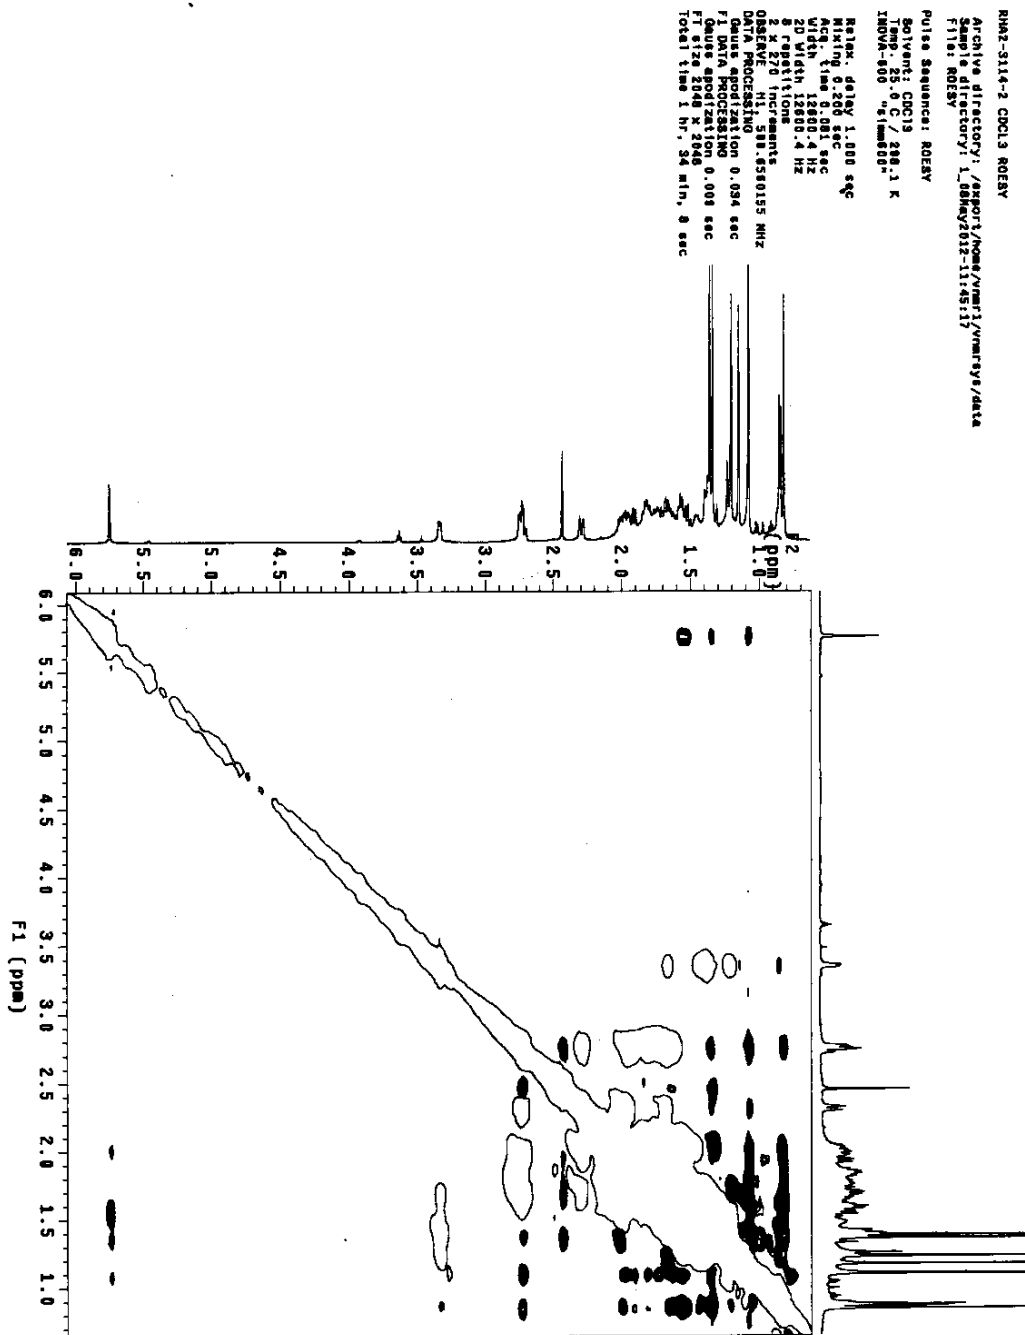

Figure S46. ESI(+)MS spectrum of ricinodol E (5)

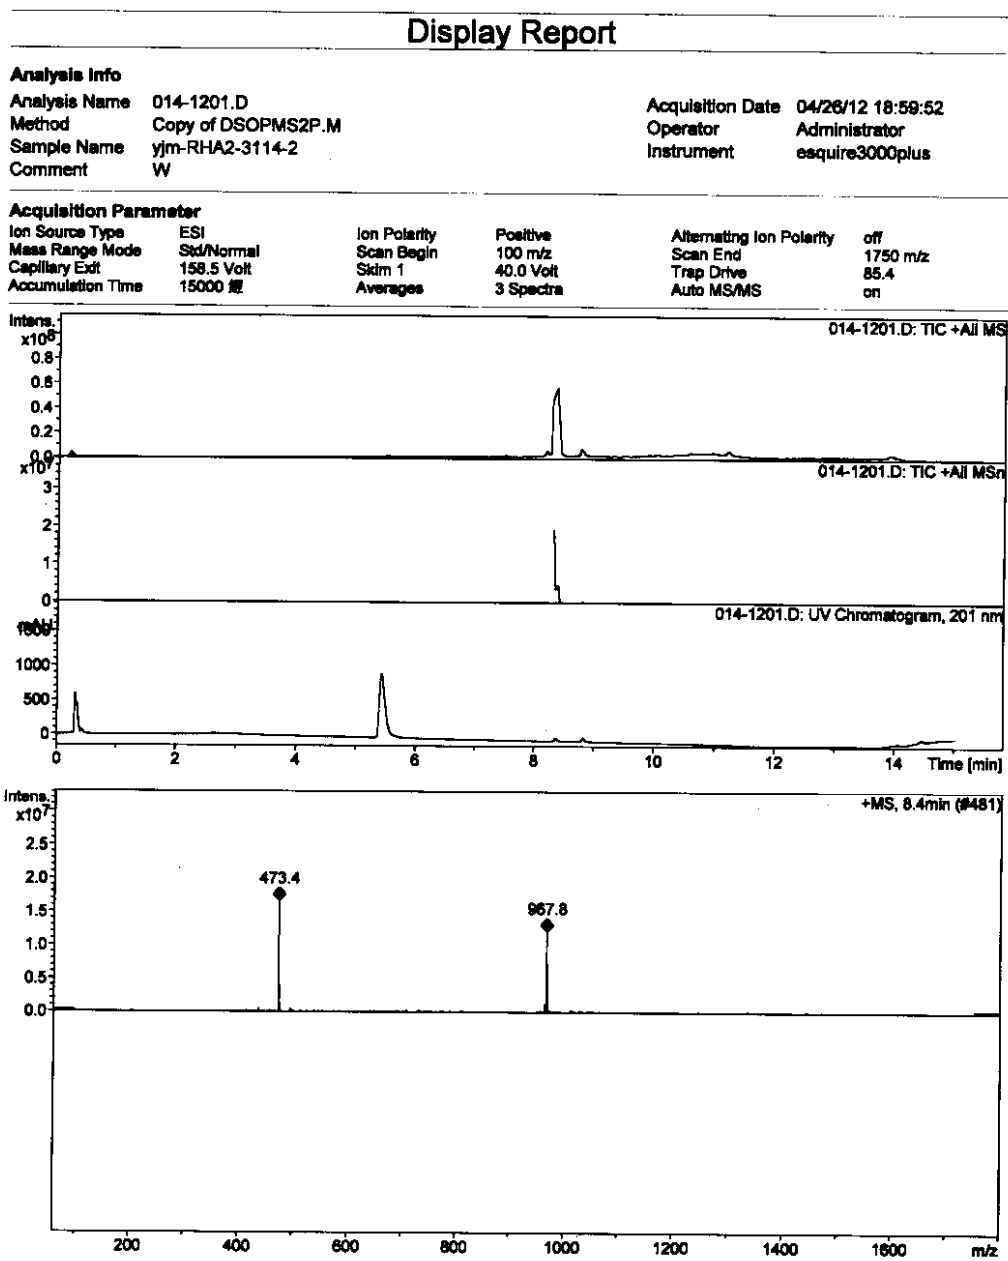

Figure S47. ESI(-)MS spectrum of ricinodol E (5)

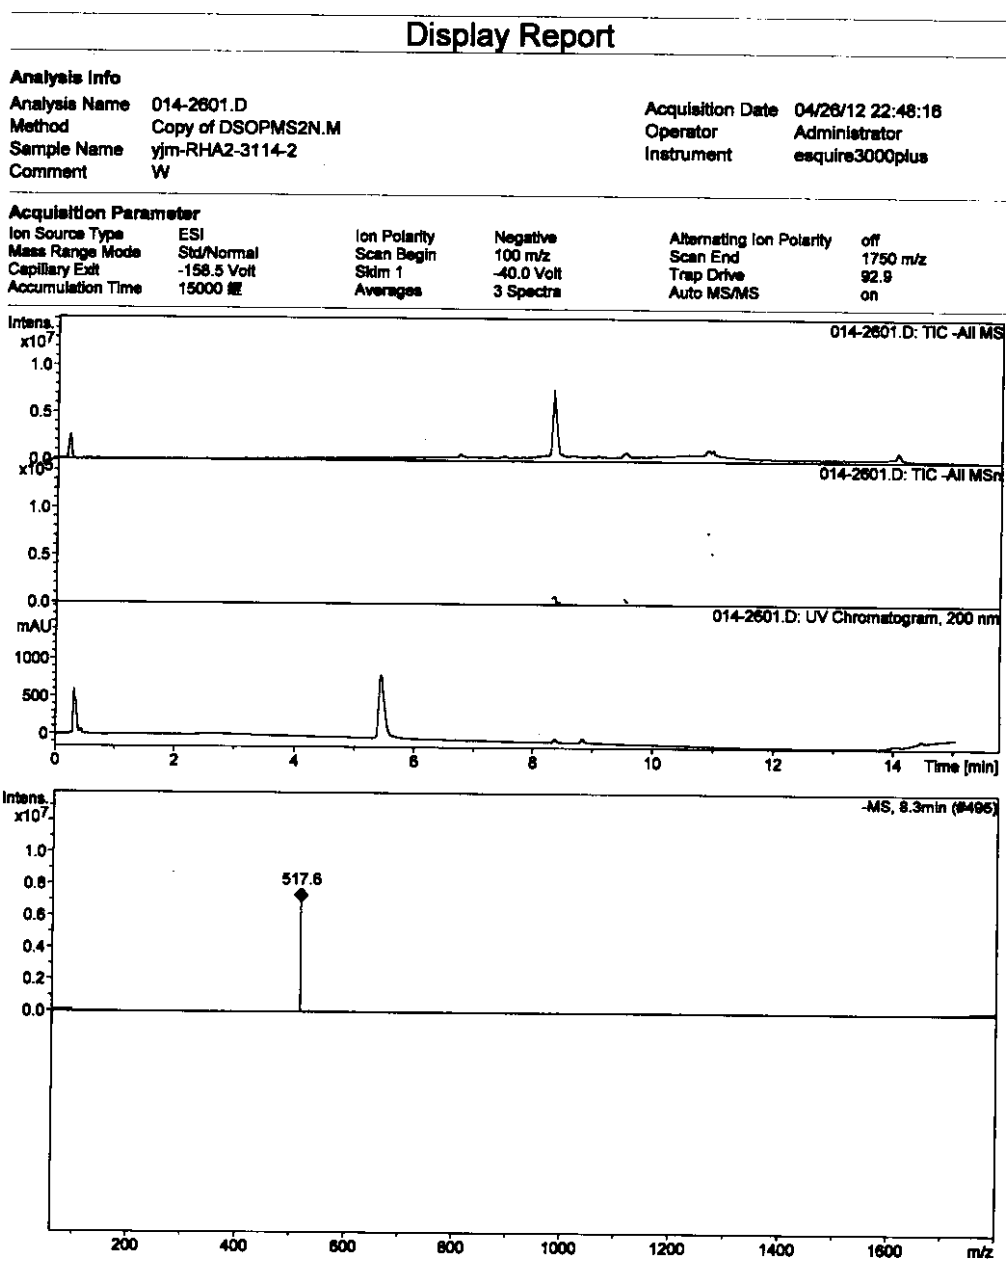

Figure S48. HRESI(-)MS spectrum of ricinodol E (5)

Elemental Composition Report

Page 1

Single Mass Analysis

Tolerance = 3.0 PPM / DBE: min = -1.5, max = 50.0

Element prediction: Off

Number of isotope peaks used for i-FIT = 3

Monoisotopic Mass, Even Electron Ions

179 formula(e) evaluated with 1 results within limits (up to 50 closest results for each mass)

Elements Used:

C: 5-80 H: 2-120 O: 0-20 Na: 0-1

RHA3-3114-2

LCT PXE KE324

27-Aug-2014

09:41:12

1: TOF MS ES-

2.27e+004

RHA3-3114-2\_0827 42 (0.934) AM2 (Ar,10000.0,0.00,1.00); ABS; Cm (42:56)

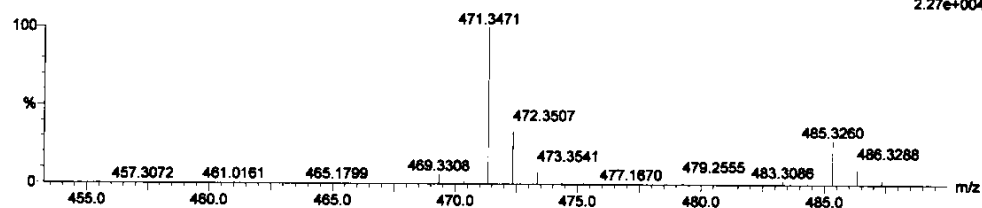

Minimum:

Maximum: 5.0 3.0 -1.5

| Mass     | Calc. Mass | mDa  | PPM  | DBE | i-FIT | i-FIT (Norm) | Formula    |
|----------|------------|------|------|-----|-------|--------------|------------|
| 471.3471 | 471.3474   | -0.3 | -0.6 | 7.5 | 161.7 | 0.0          | C30 H47 O4 |

Figure S49. IR spectrum of ricinodol E (5)

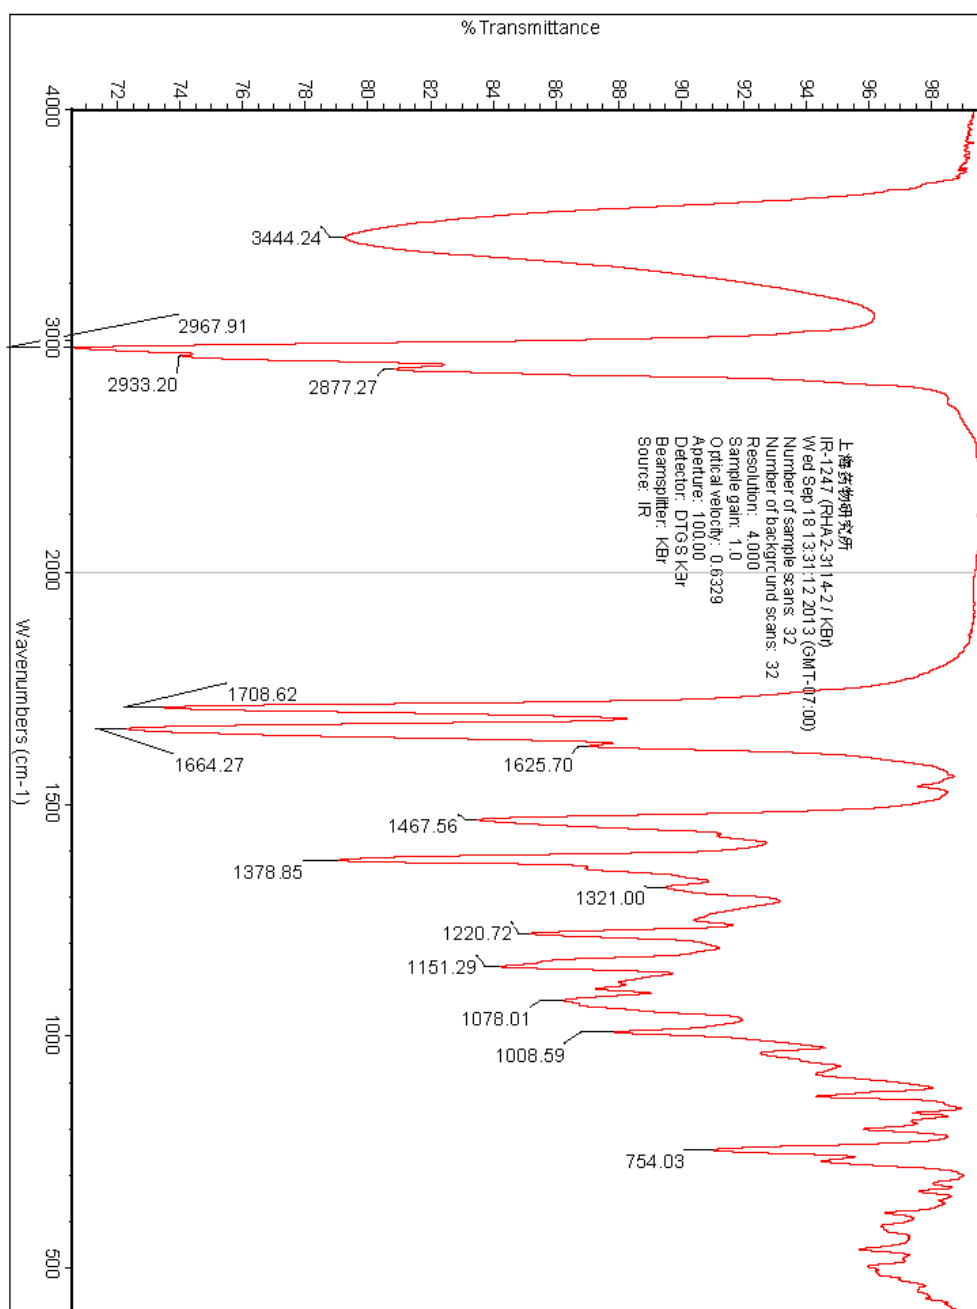

**Figure S50.**  $^1\text{H}$  NMR spectrum of ricinodol F (**6**) in  $\text{CDCl}_3$

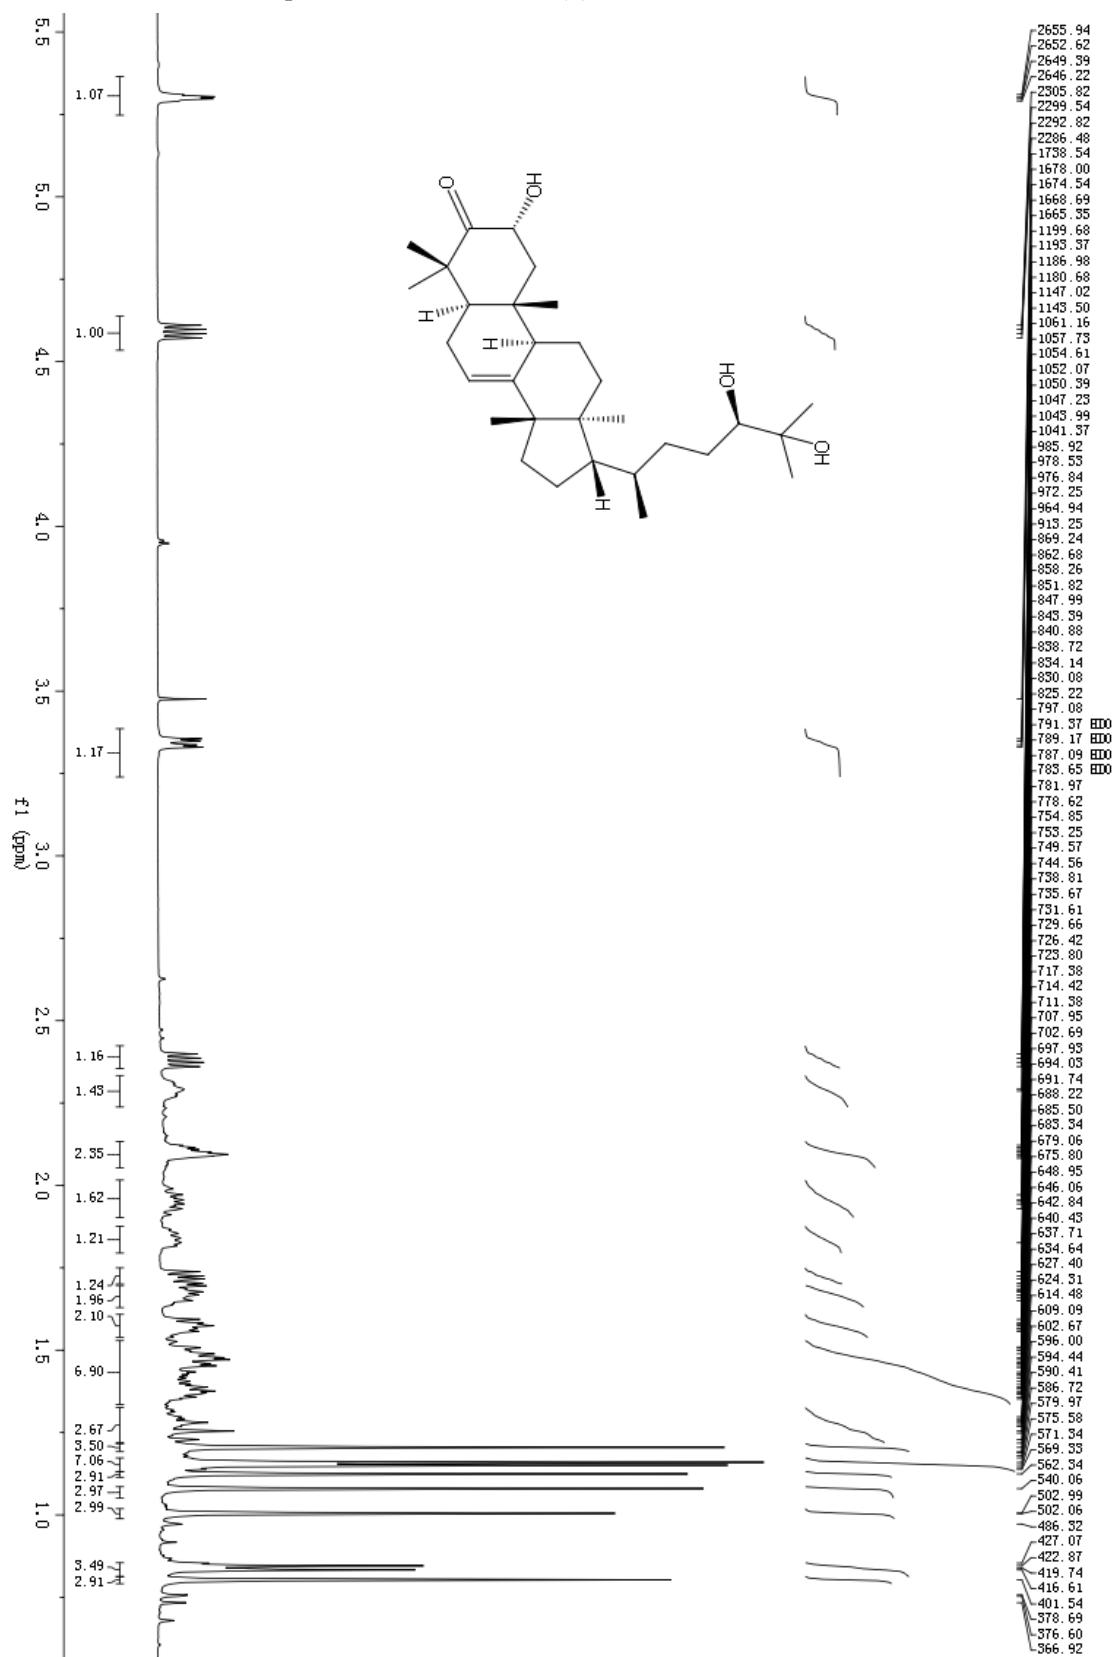

**Figure S51.**  $^{13}\text{C}$  NMR spectrum of ricinodol F (**6**) in  $\text{CDCl}_3$

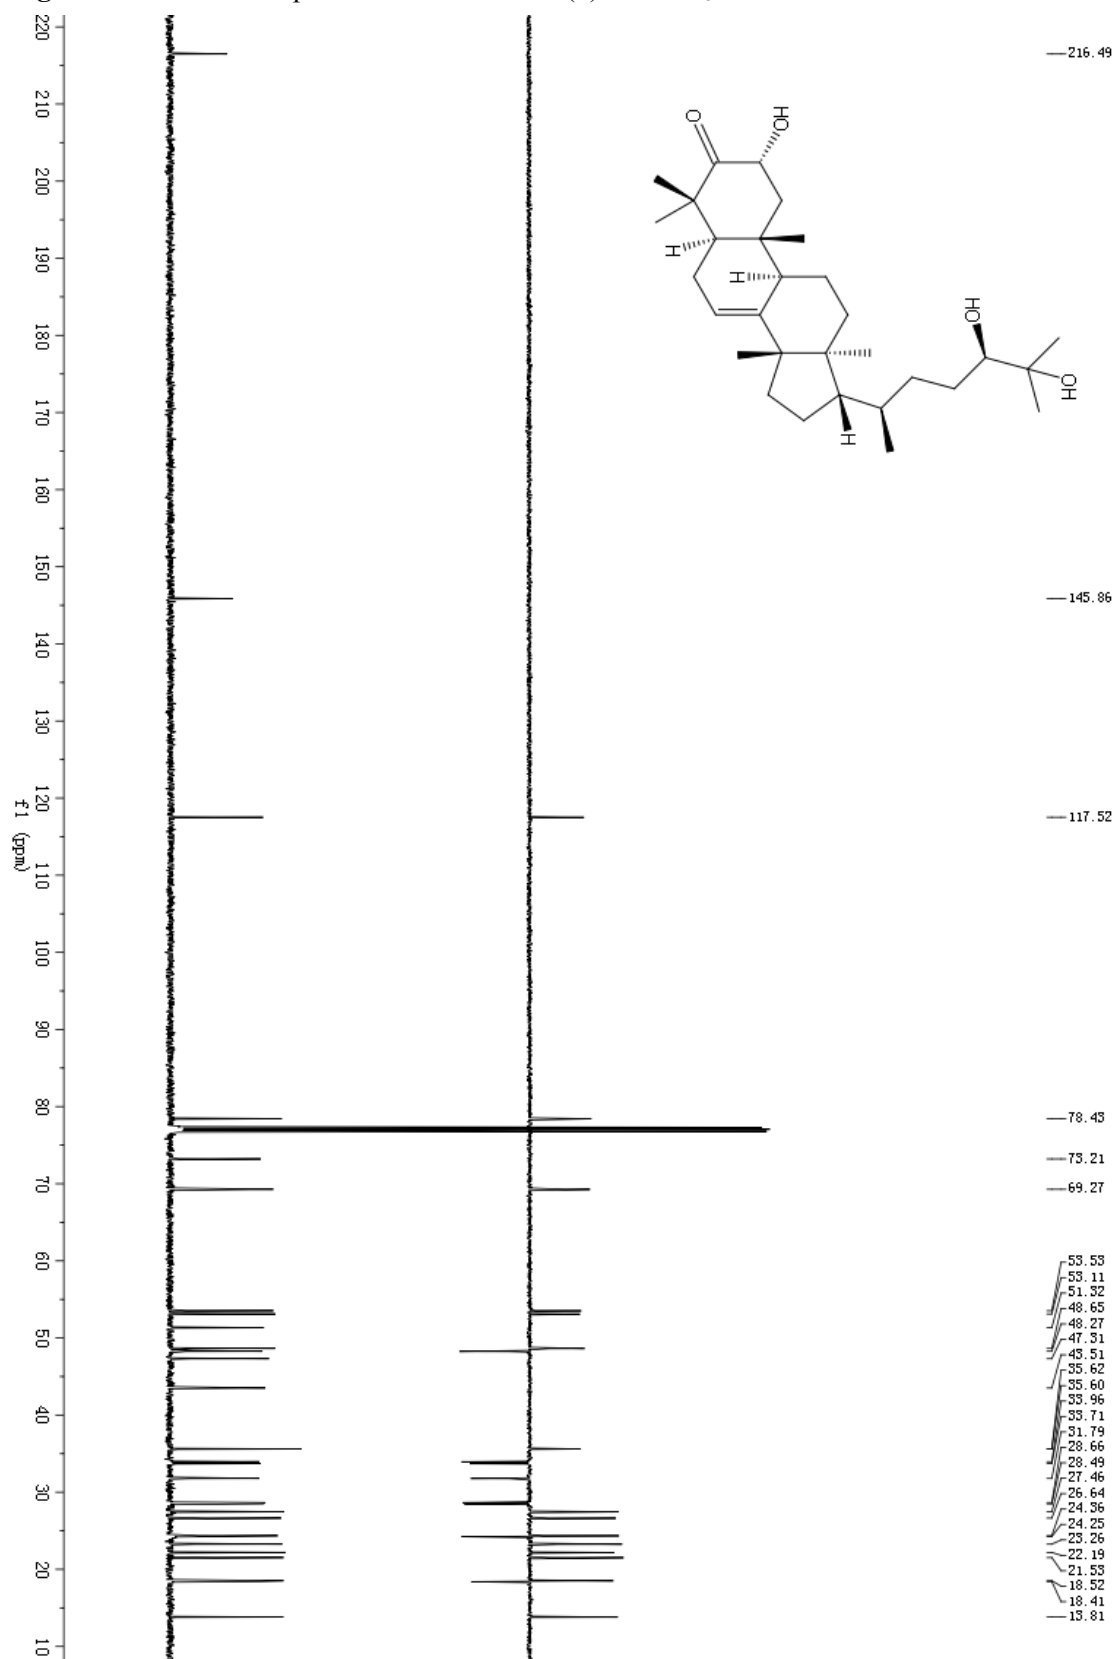



**Figure S52.** HSQC spectrum of ricinodol F (**6**) in CDCl<sub>3</sub>

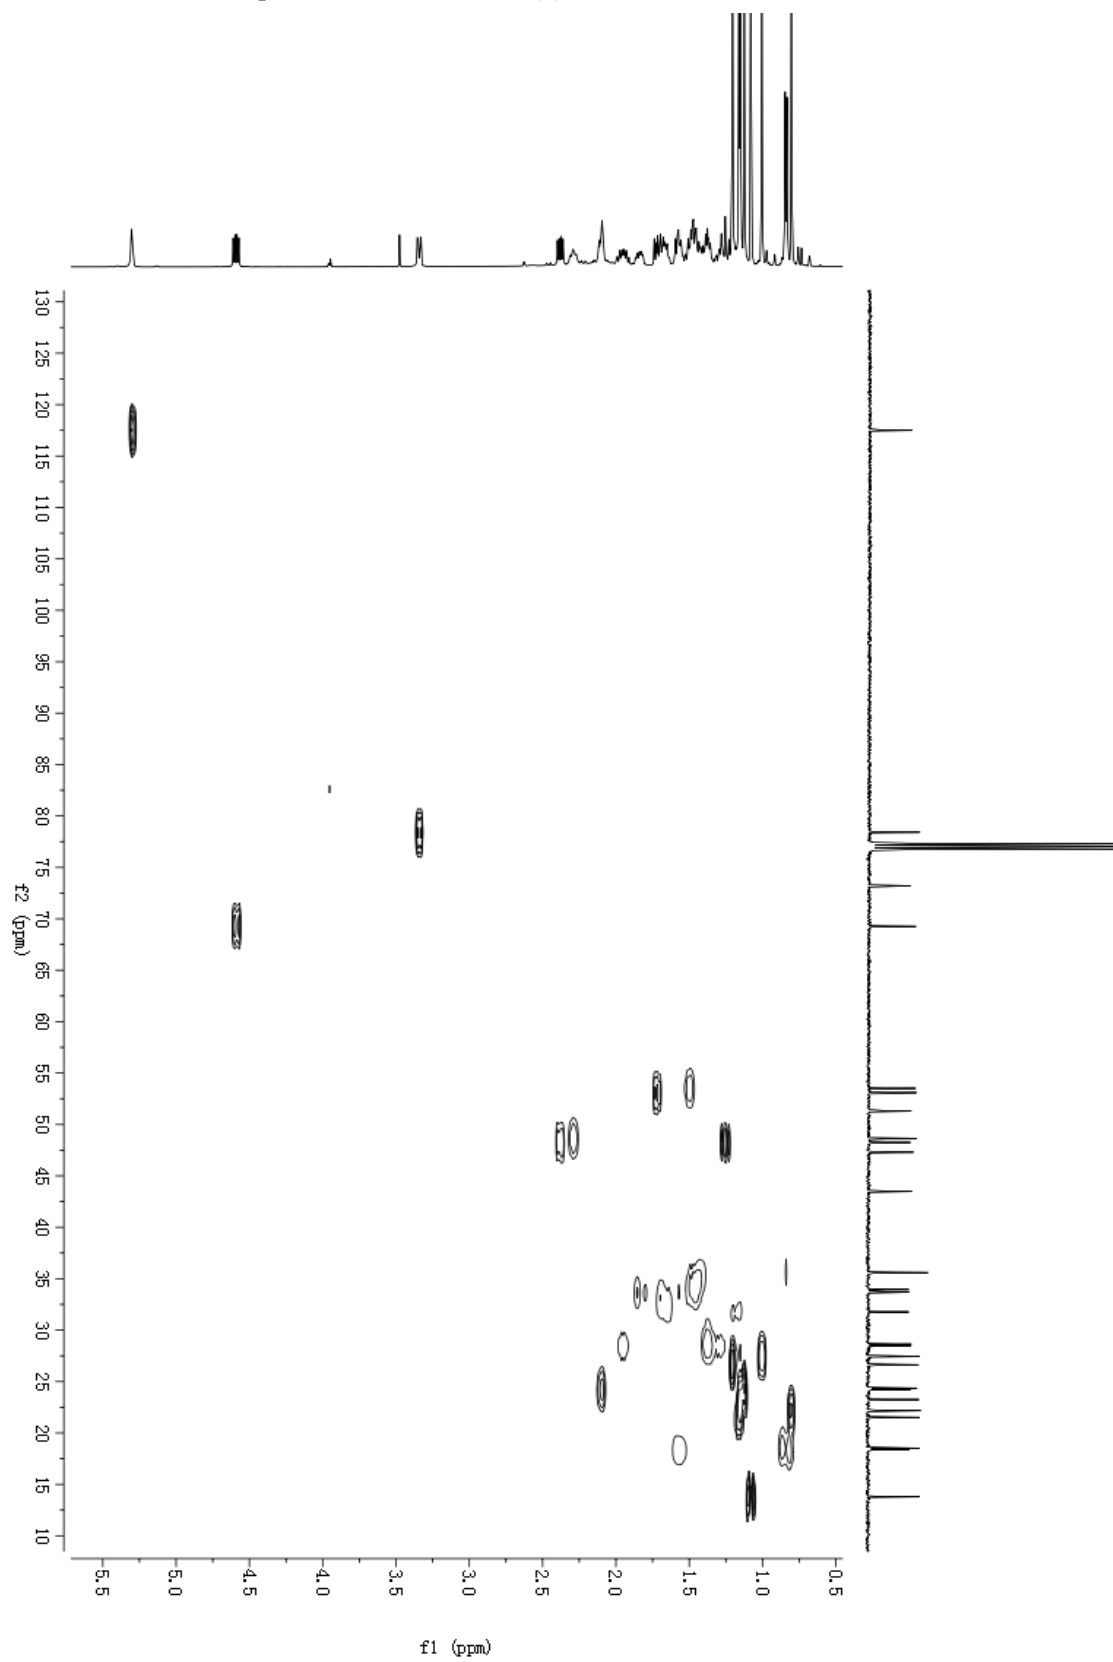

**Figure S53.** HMBC spectrum of ricinodol F (**6**) in CDCl<sub>3</sub>

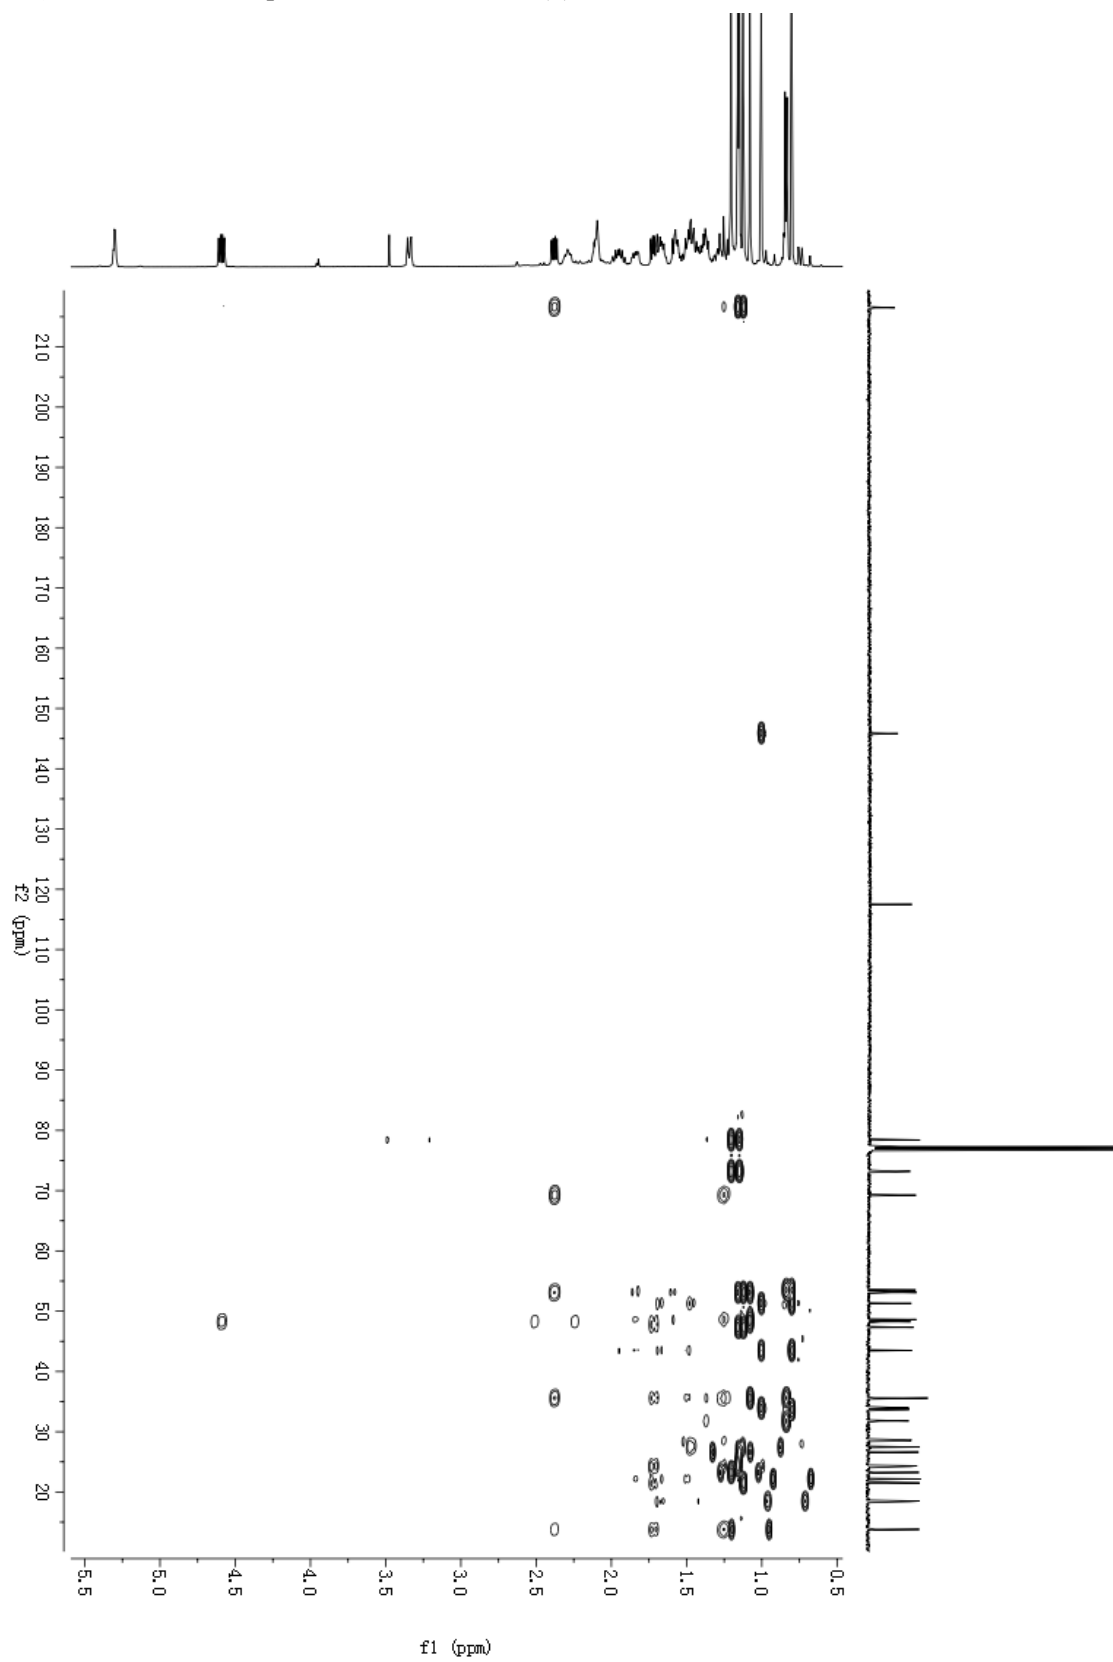

Figure S54. ROESY spectrum of ricinodol F (6) in CDCl<sub>3</sub>

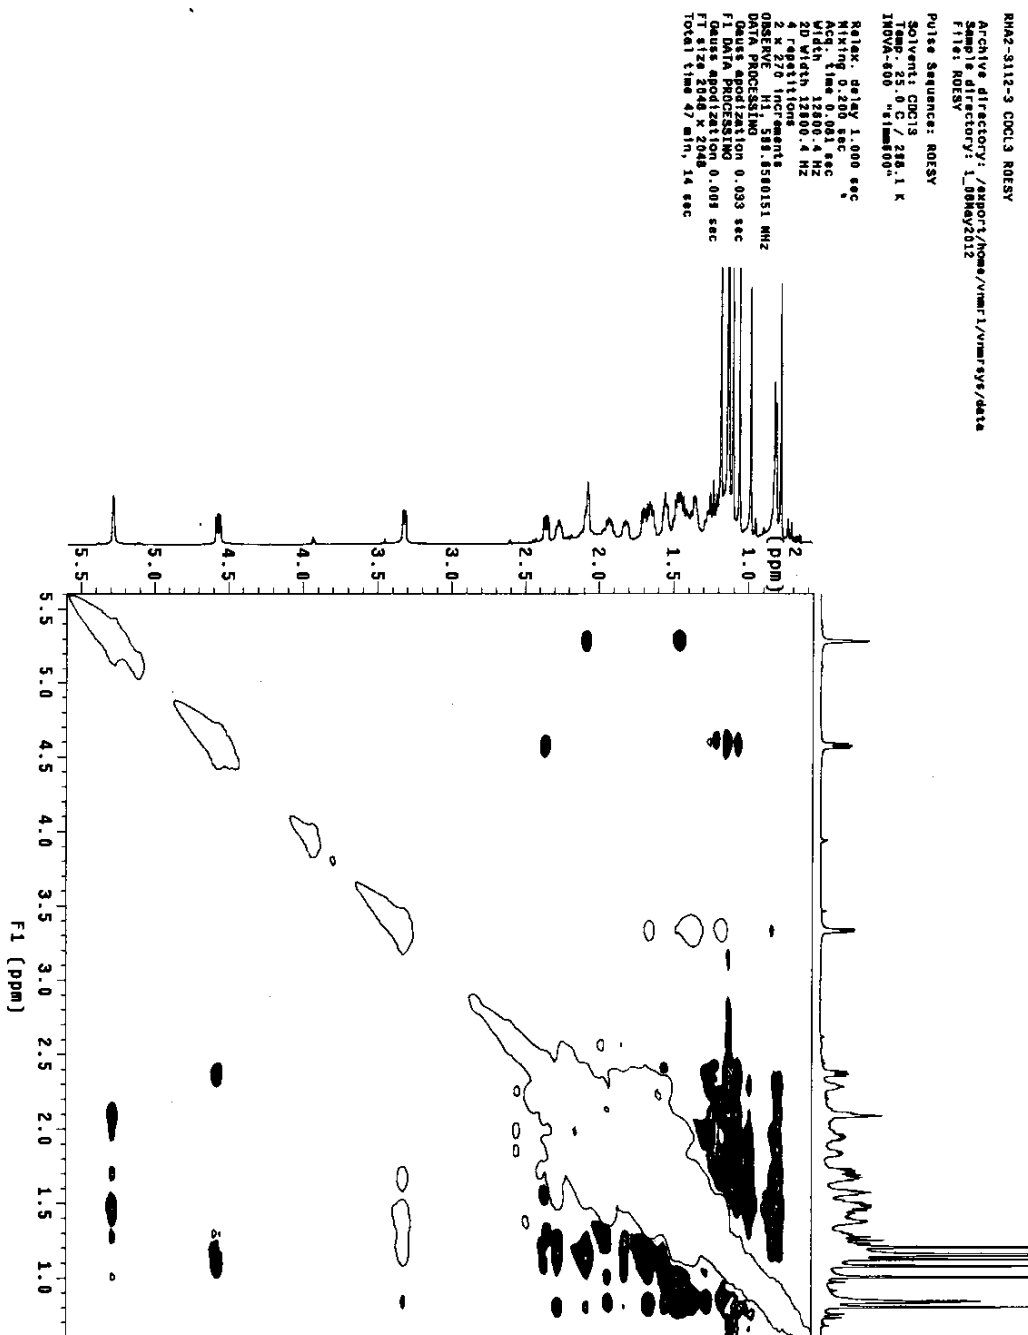

Figure S55. ESI(+)MS spectrum of ricinodol F (6)

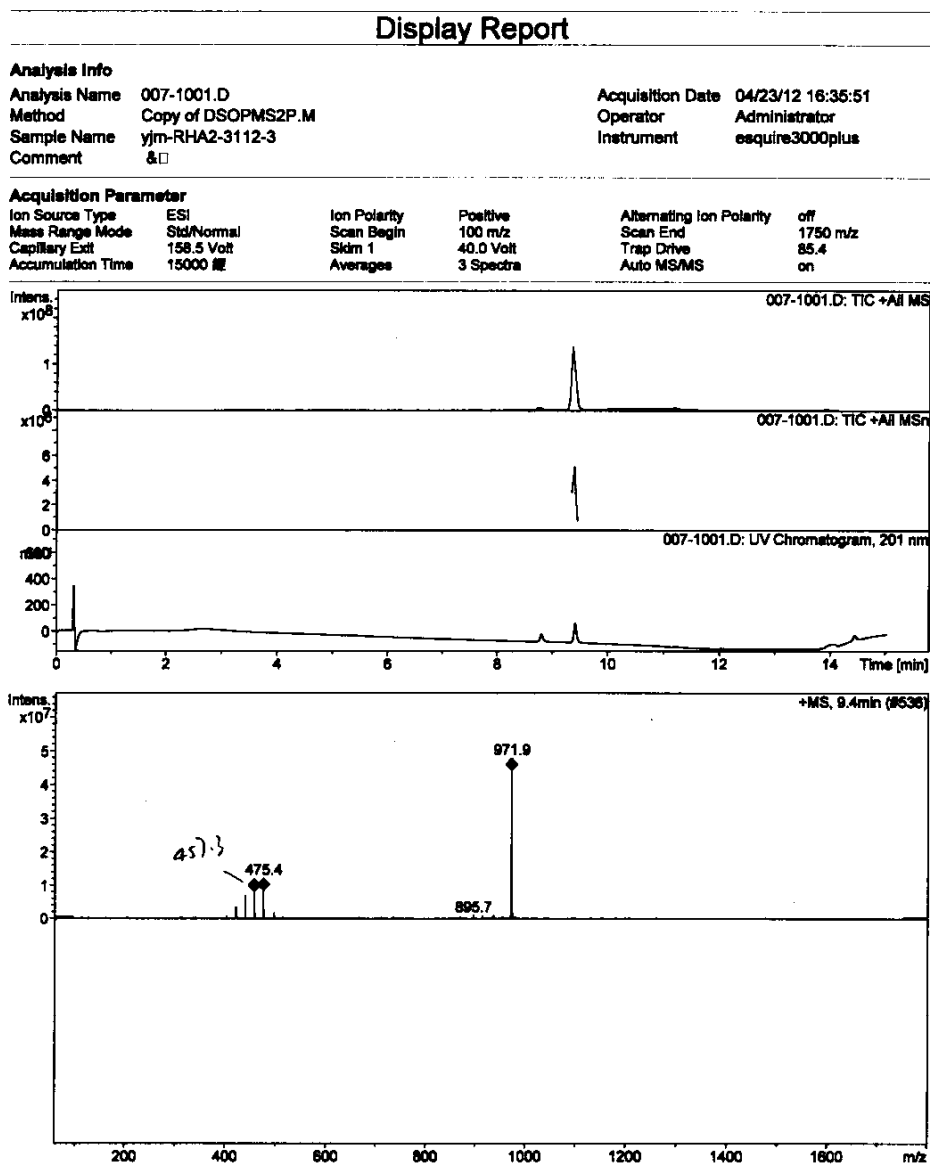

Figure S56. ESI(-)MS spectrum of ricinodol F (6)

### Display Report

#### Analysis Info

Analysis Name 007-2101.D  
Method Copy of DSOPMS2N.M  
Sample Name yjm-RHA2-3112-3  
Comment &□

Acquisition Date 04/23/12 19:35:17  
Operator Administrator  
Instrument esquire3000plus

#### Acquisition Parameter

Ion Source Type ESI  
Mass Range Mode Std/Normal  
Capillary Exit -156.5 Volt  
Accumulation Time 15000 程

Ion Polarity Negative  
Scan Begin 100 m/z  
Skim 1 -40.0 Volt  
Averages 3 Spectra

Alternating Ion Polarity off  
Scan End 1750 m/z  
Trap Drive 92.9  
Auto MS/MS on

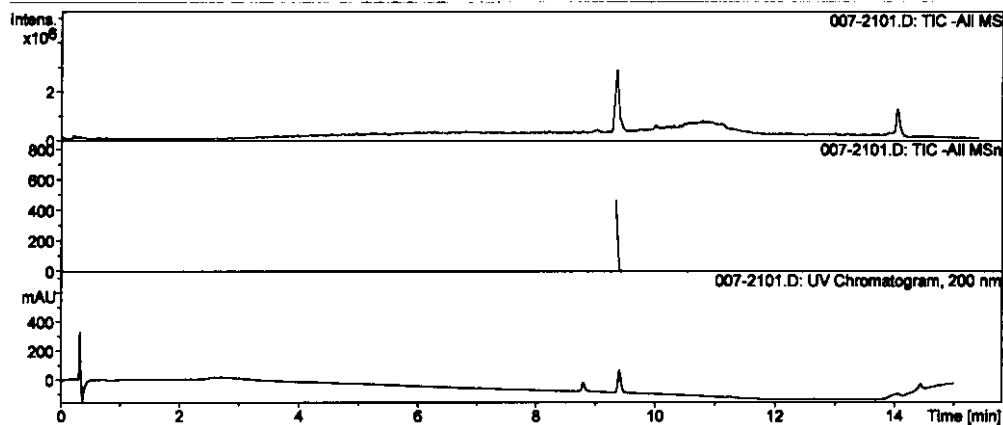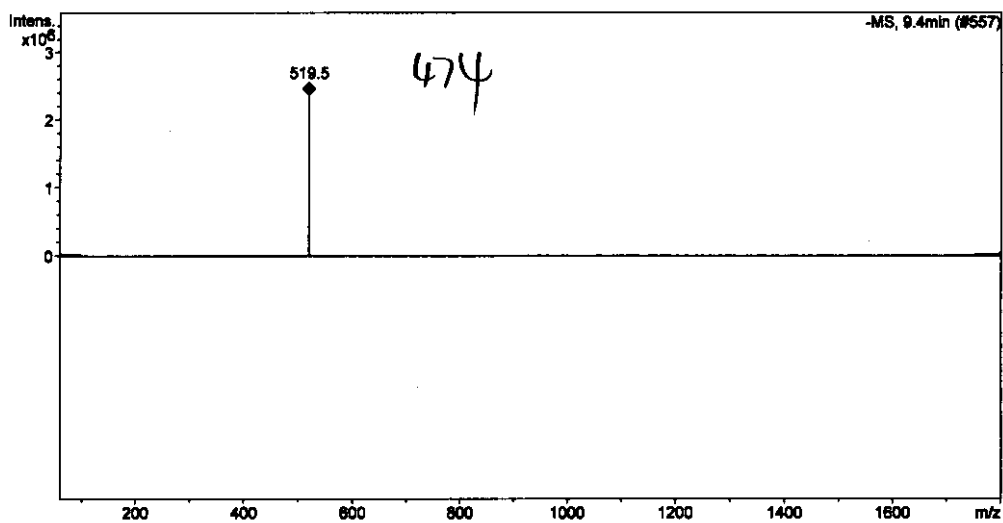

Figure S57. HRESI(-)MS spectrum of ricinodol F (6)

Elemental Composition Report

Single Mass Analysis

Tolerance = 3.0 PPM / DBE: min = -1.5, max = 50.0

Element prediction: Off

Number of isotope peaks used for i-FIT = 3

Monoisotopic Mass, Even Electron Ions

121 formula(e) evaluated with 1 results within limits (up to 50 best isotopic matches for each mass)

Elements Used:

C: 10-80 H: 1-110 O: 0-30

yjh

LCT PXE KE324

04-May-2012

16:19:21

1: TOF MS ES-

3.70e+004

963.7169

RHA2-3112-3 17 (0.335) AM2 (Ar,10000.0,0.00,1.00); ABS; Cm (4:21)

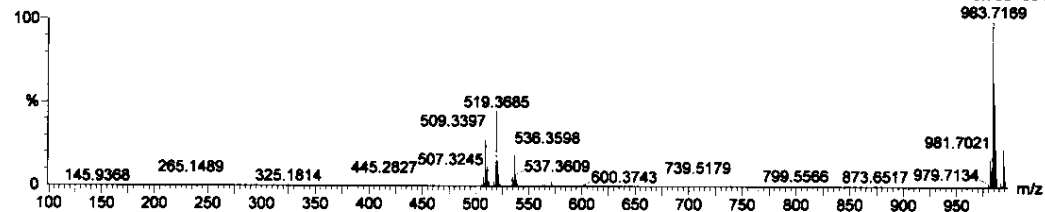

Minimum:

5.0 3.0 -1.5

Maximum:

50.0

| Mass | Calc. Mass | mDa | PPM | DBE | i-FIT | i-FIT (Norm) | Formula |
|------|------------|-----|-----|-----|-------|--------------|---------|
|------|------------|-----|-----|-----|-------|--------------|---------|

|          |          |      |      |     |       |     |            |
|----------|----------|------|------|-----|-------|-----|------------|
| 519.3685 | 519.3686 | -0.1 | -0.2 | 6.5 | 114.6 | 0.0 | C31 H51 O6 |
|----------|----------|------|------|-----|-------|-----|------------|

Figure S58. IR spectrum of ricinodol F (6)

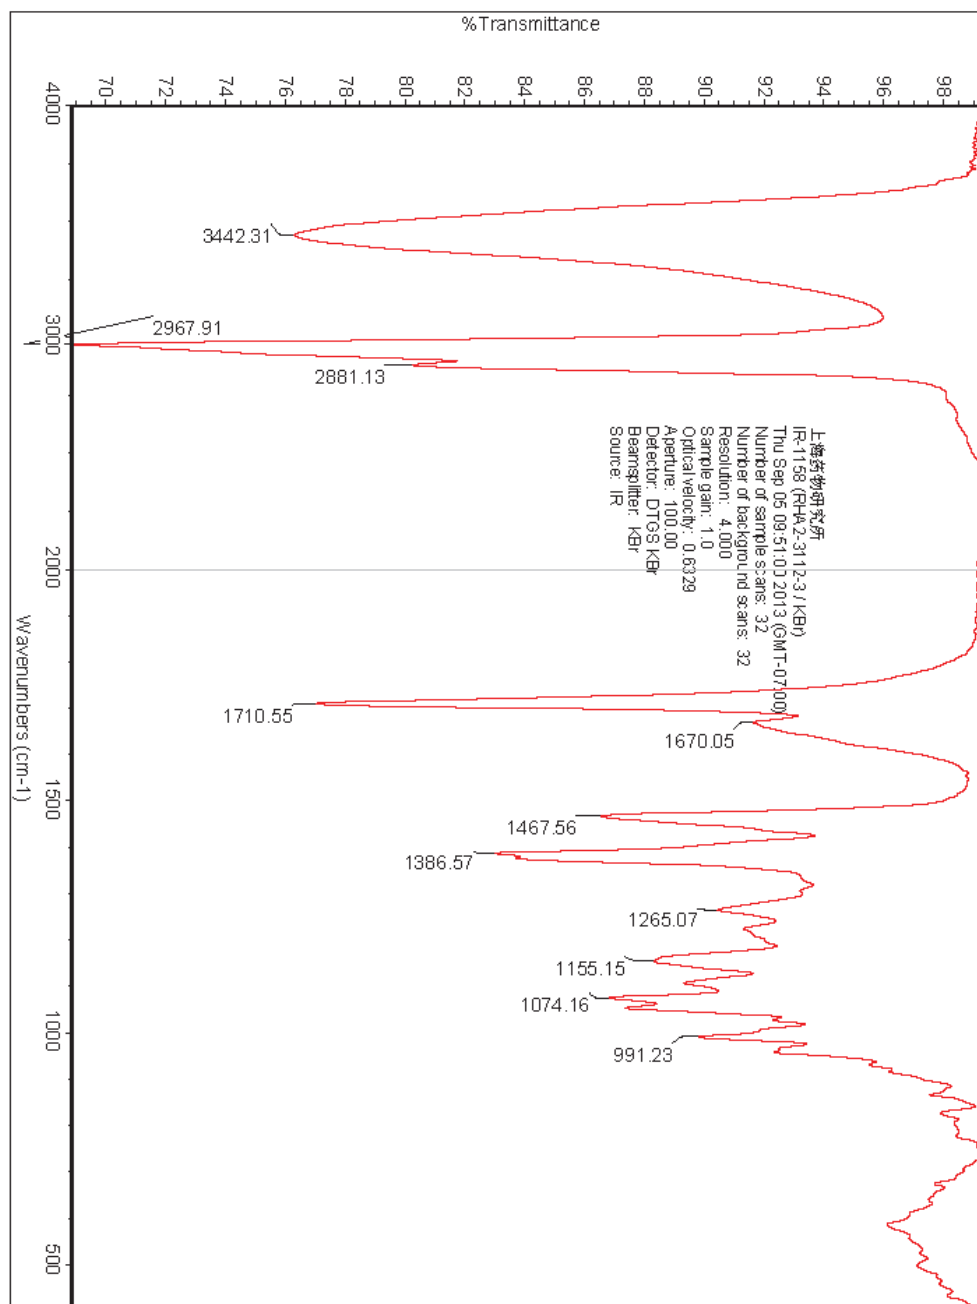

**Figure S59.**  $^1\text{H}$  NMR spectrum of ricinodol G (**7**) in  $\text{CDCl}_3$

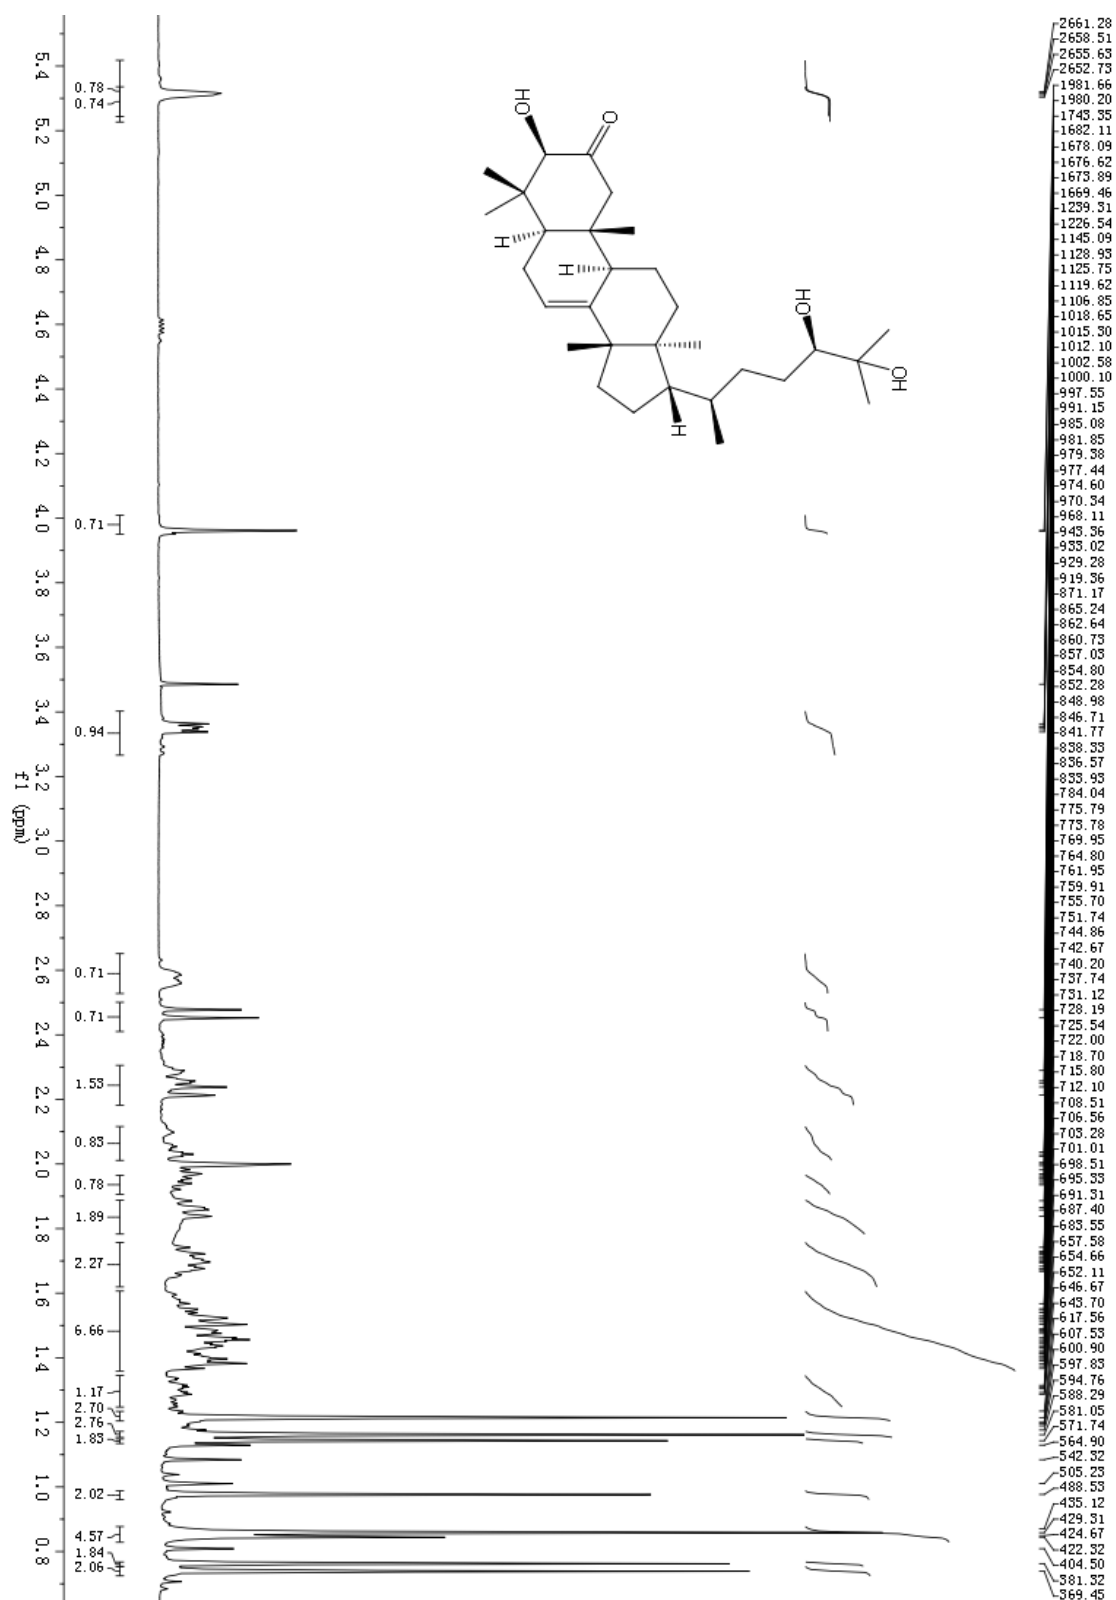



**Figure S60.**  $^{13}\text{C}$  NMR spectrum of ricinodol G (7) in  $\text{CDCl}_3$

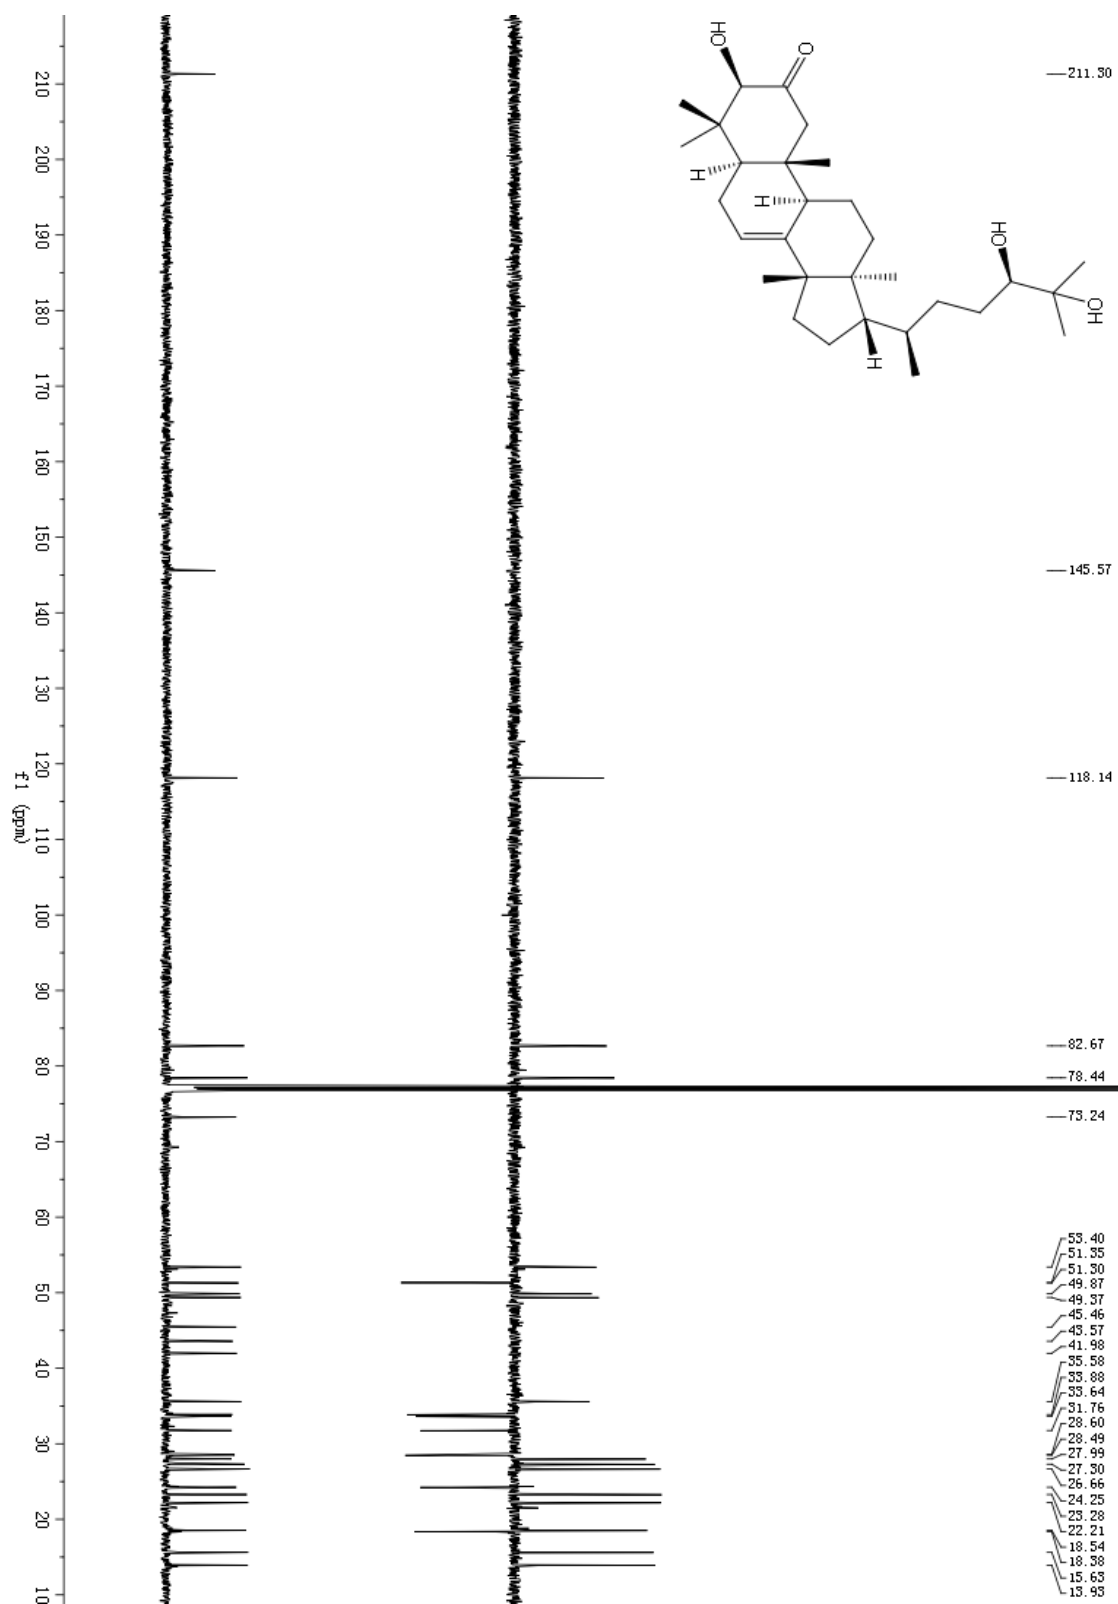

**Figure S61.** HSQC spectrum of ricinodol G (7) in CDCl<sub>3</sub>

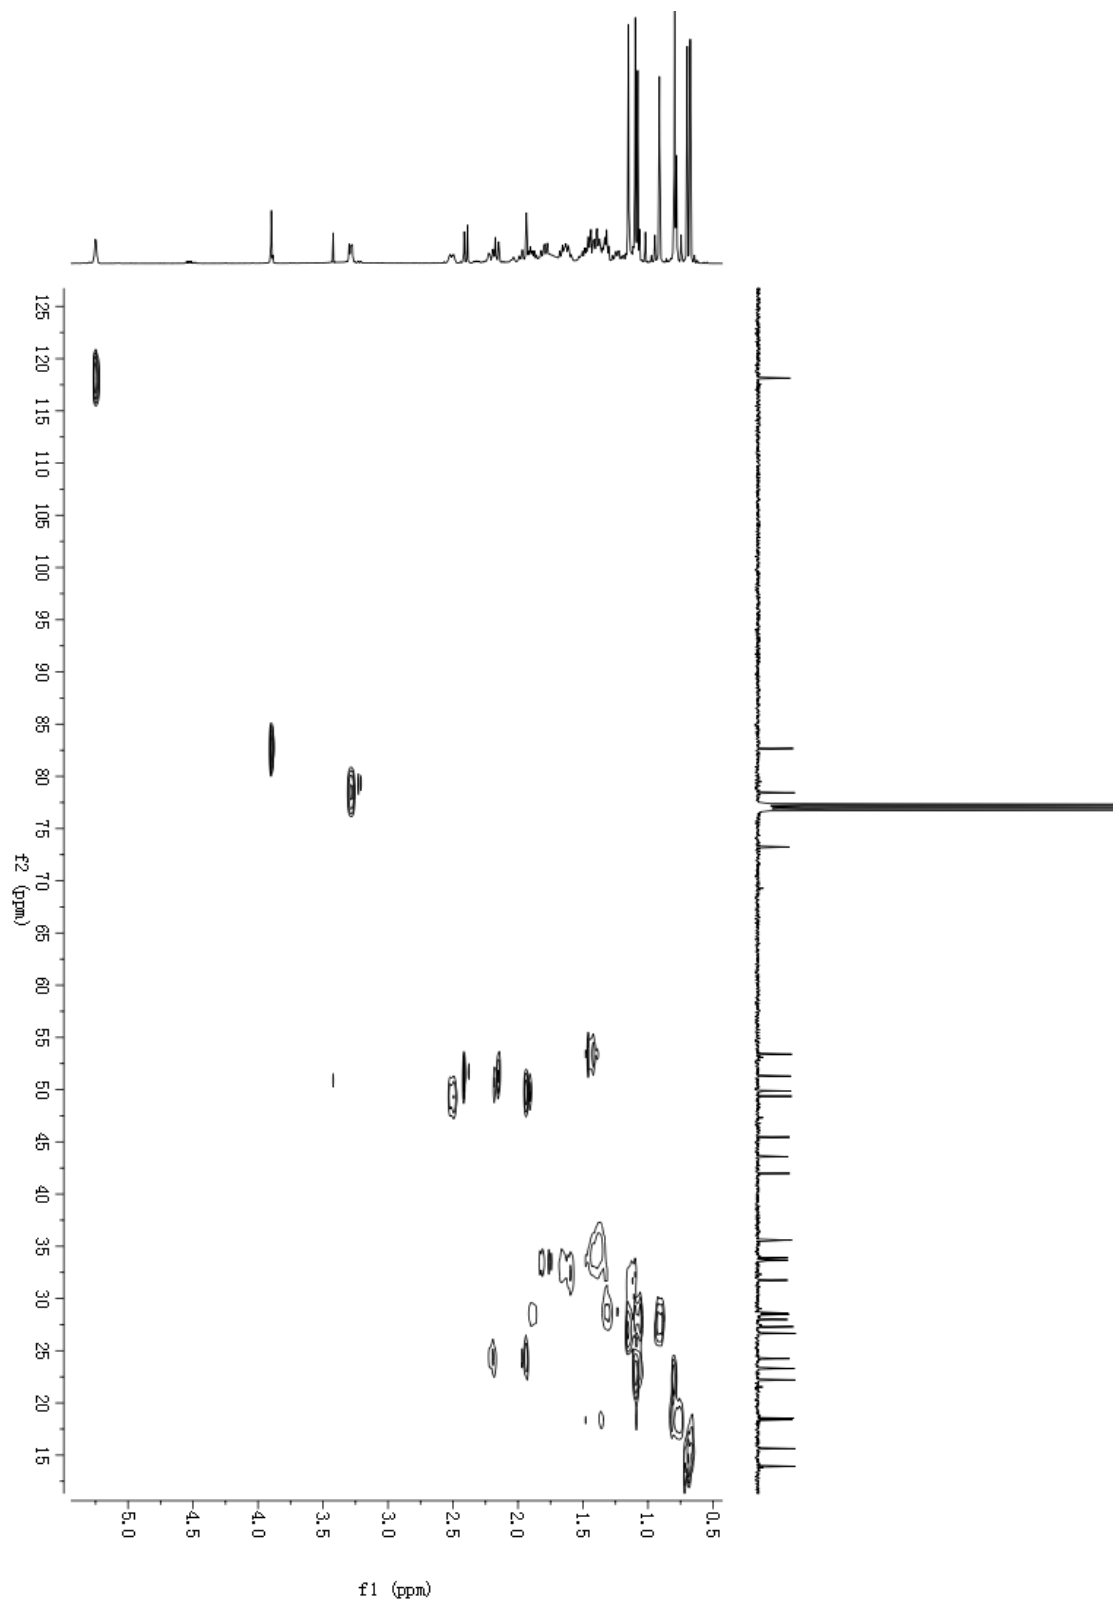

**Figure S62.** HMBC spectrum of ricinodol G (**7**) in CDCl<sub>3</sub>

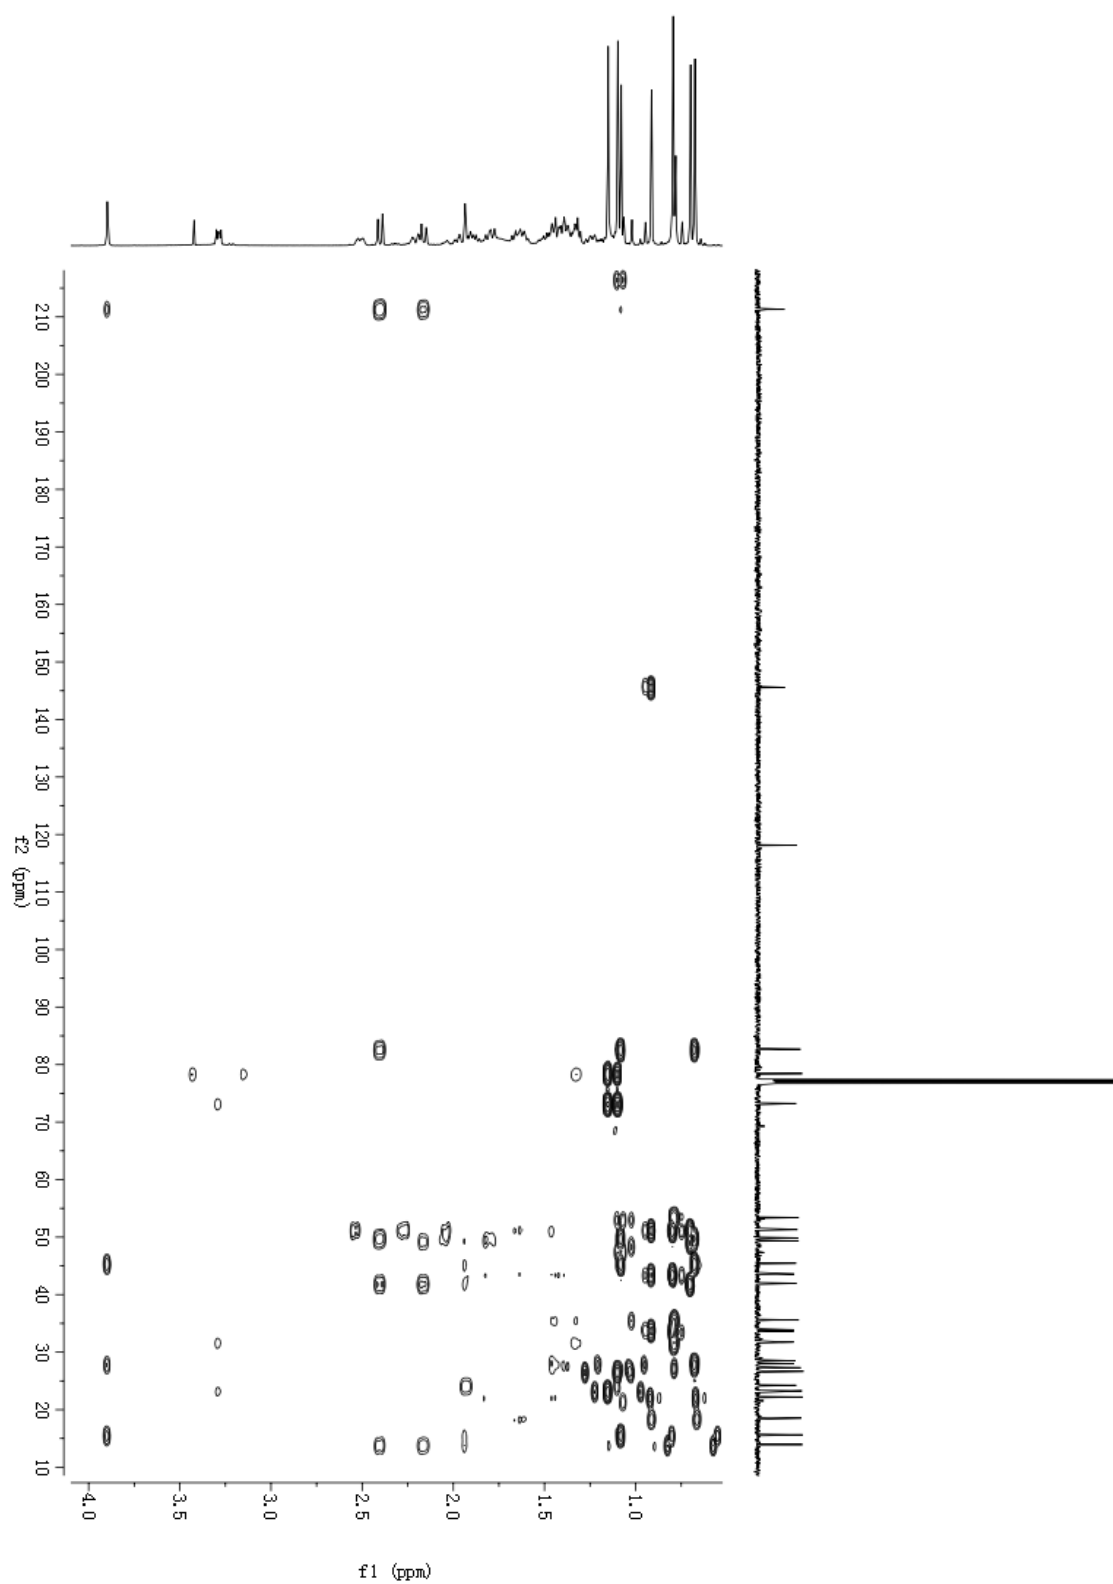

Figure S63. ROESY spectrum of ricinodol G (7) in CDCl<sub>3</sub>

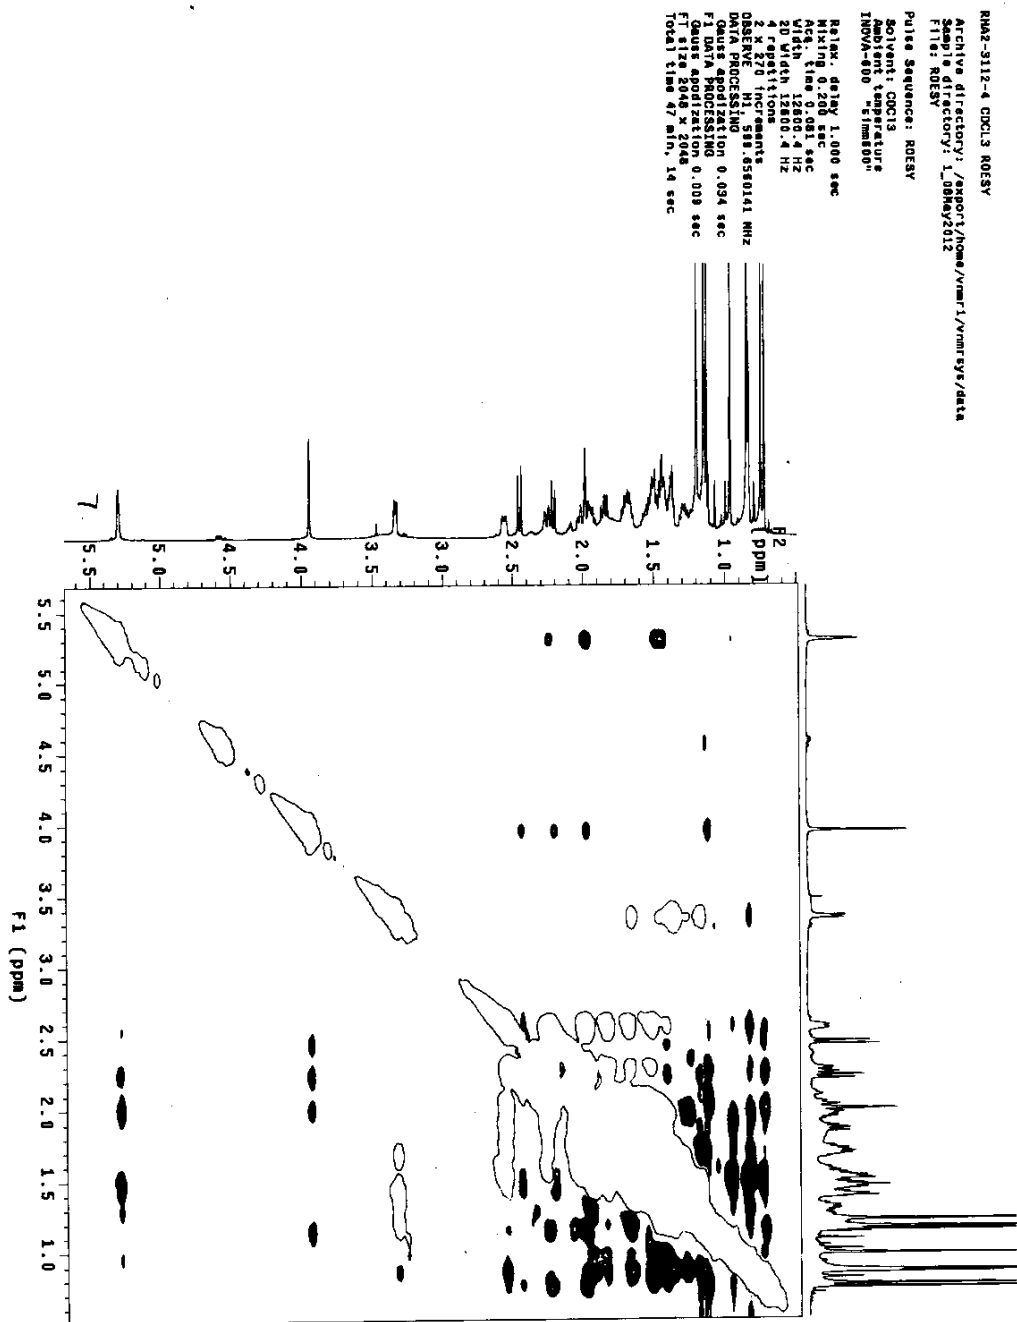

Figure S64. ESI(+)MS spectrum of ricinodol G (7)

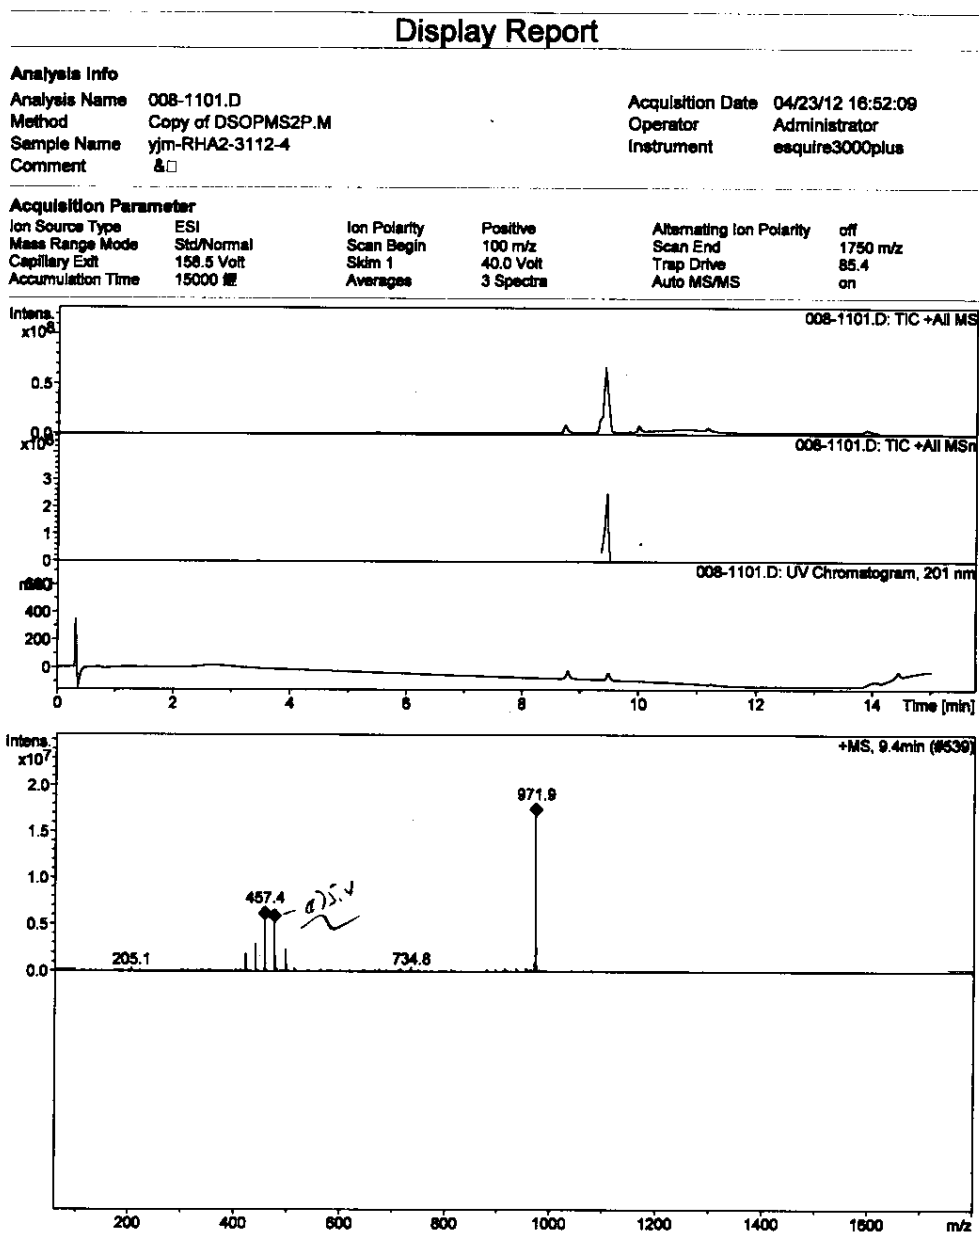

Figure S65. ESI(-)MS spectrum of ricinodol G (7)

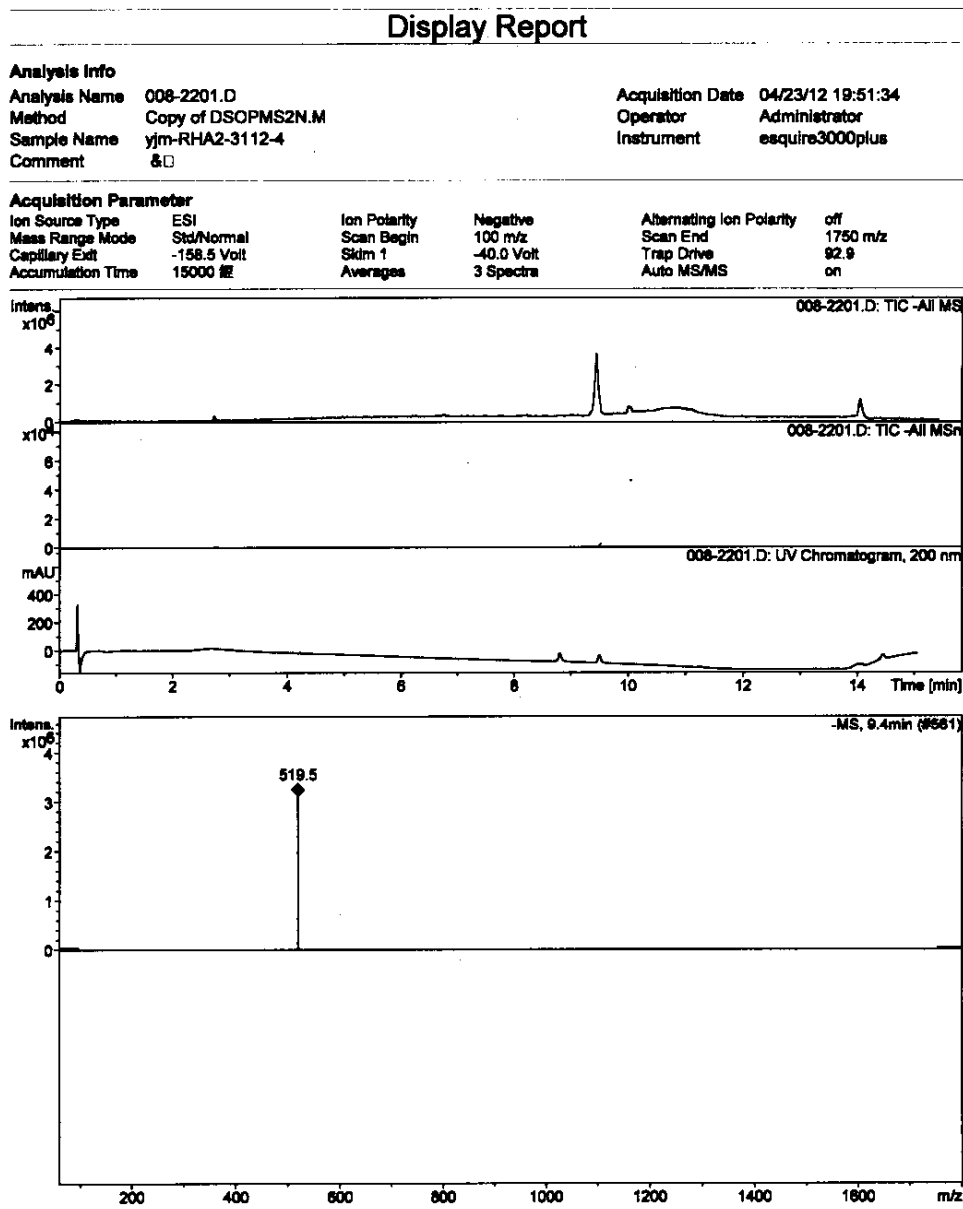

Figure S66. HRESI(-)MS spectrum of ricinodol G (7)

Elemental Composition Report

Single Mass Analysis

Tolerance = 3.0 PPM / DBE: min = -1.5, max = 50.0  
 Element prediction: Off  
 Number of isotope peaks used for i-FIT = 3

Monoisotopic Mass, Even Electron Ions

121 formula(e) evaluated with 1 results within limits (up to 50 best isotopic matches for each mass)

Elements Used:

C: 10-80 H: 1-110 O: 0-30

yjh

LCT PXE KE324

04-May-2012

16:24:53

1: TOF MS ES-

4.20e+004

983.7165

RHA2-3112-4 36 (0.759) AM2 (Ar, 10000.0, 0.00, 1.00); ABS: Cm (23.42)

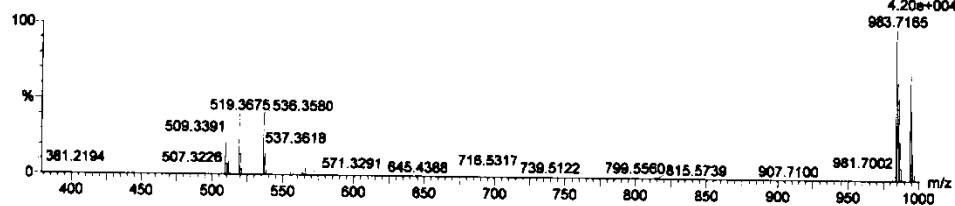

Minimum: 5.0 3.0 -1.5  
 Maximum: 50.0

| Mass     | Calc. Mass | mDa  | PPM  | DBE | i-FIT | i-FIT (Norm) | Formula    |
|----------|------------|------|------|-----|-------|--------------|------------|
| 519.3675 | 519.3686   | -1.1 | -2.1 | 6.5 | 106.5 | 0.0          | C31 H51 O6 |

Figure S67. IR spectrum of ricinodol G (7)

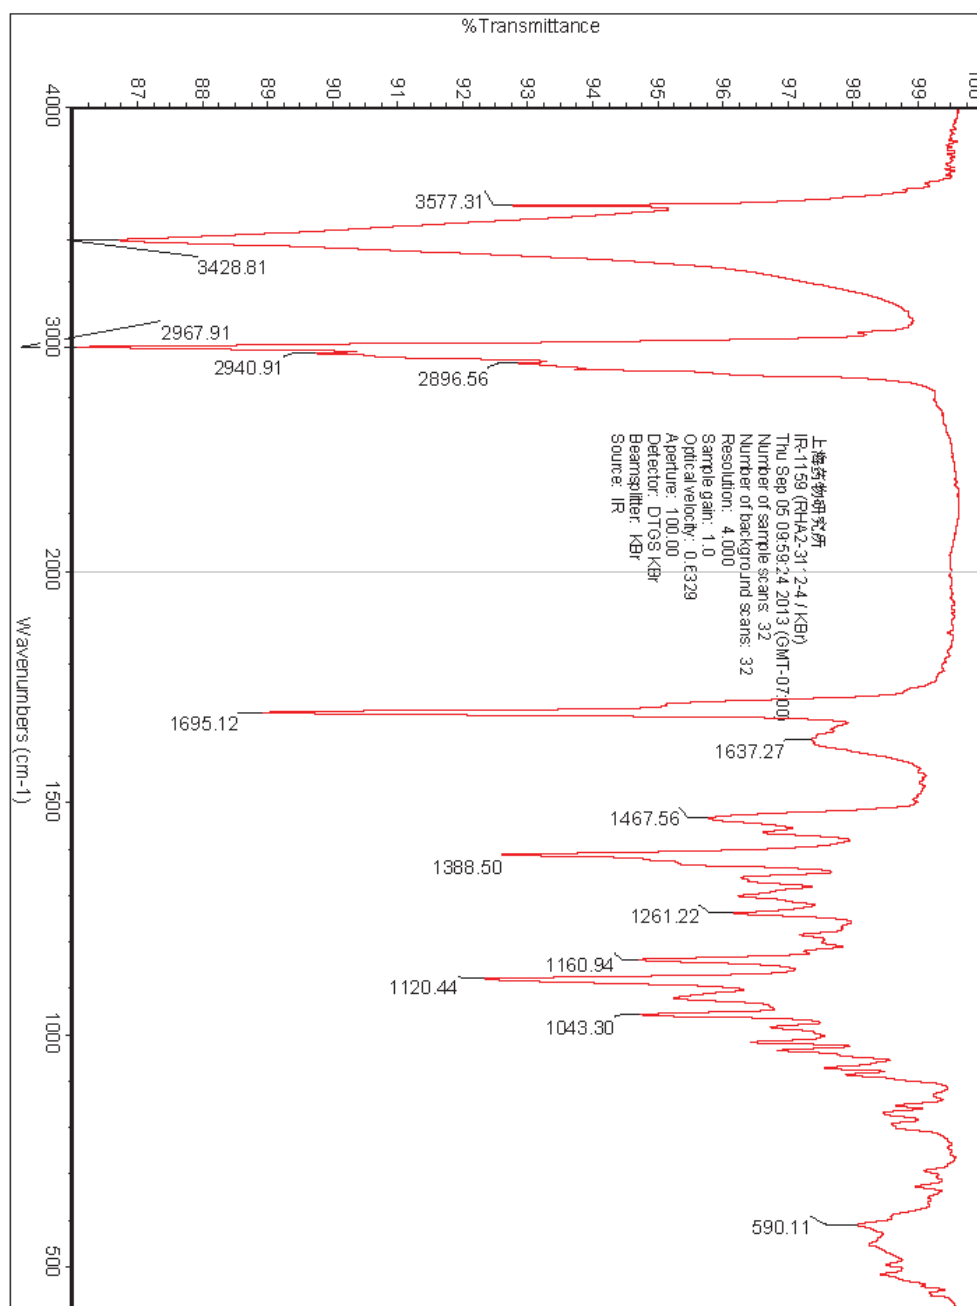

Supplement: c5ra01857a1.pdf [file c5ra01857a1.pdf]
